# Supplementary material
Source: PubMed Central journal article supplement (PMC3640650)
Supplement: NIHMS461584-supplement-supplementary_data.pdf [file NIHMS461584-supplement-supplementary_data.pdf]

Sheet1

| locus | snp        | chr | bp        | allele1 | allele2 | function          | Continuous_beta | Continuous_p | Median_beta | Median_p  | Extreme_beta | Extreme_p  |
|-------|------------|-----|-----------|---------|---------|-------------------|-----------------|--------------|-------------|-----------|--------------|------------|
| EV15  | rs10782922 | 1   | 92974595  | C       | T       | utr-3             | -0.2427432      | 0.040794     | -0.2564514  | 0.0161882 | -0.404559886 | 0.0089249  |
| EV15  | rs1886683  | 1   | 92976023  | A       | C       | utr-3             | -0.2430975      | 0.040587     | -0.2567108  | 0.0161208 | -0.405743062 | 0.00874159 |
| EV15  | rs1886682  | 1   | 92977275  | A       | T       | utr-3             | -0.2433807      | 0.0404384    | -0.2568905  | 0.0160828 | -0.406914879 | 0.00856232 |
| EV15  | rs6603979  | 1   | 92979354  | C       | G       | coding-synonymous | -0.243483       | 0.0403548    | -0.2569484  | 0.0160582 | -0.407369928 | 0.00848618 |
| EV15  | rs17371561 | 1   | 92981239  | A       | C       | intron            | -0.3411335      | 0.0212853    | -0.4146285  | 0.002456  | -0.507036061 | 0.00844624 |
| EV15  | rs11581176 | 1   | 92982418  | C       | G       | intron            | 0.3587213       | 0.0036393    | 0.2904686   | 0.0073556 | 0.422383758  | 0.00427    |
| EV15  | rs6686702  | 1   | 92987430  | C       | T       | intron            | -0.243502       | 0.0402392    | -0.2564569  | 0.0161842 | -0.410113666 | 0.00799115 |
| EV15  | rs4375281  | 1   | 92987575  | A       | G       | intron            | -0.2434761      | 0.0402346    | -0.2563665  | 0.0162044 | -0.410356277 | 0.00794137 |
| EV15  | rs4970709  | 1   | 92988592  | A       | C       | intron            | -0.2434436      | 0.0402325    | -0.256312   | 0.0162093 | -0.410526044 | 0.00790392 |
| EV15  | rs4970710  | 1   | 92988717  | A       | C       | intron            | -0.2433956      | 0.0402318    | -0.2561937  | 0.0162328 | -0.410794887 | 0.00784531 |
| EV15  | rs1408916  | 1   | 92992627  | C       | T       | intron            | -0.2429452      | 0.0403942    | -0.2558308  | 0.016279  | -0.410659743 | 0.00781475 |
| EV15  | rs4568842  | 1   | 92993156  | C       | T       | intron            | -0.2429023      | 0.0403826    | -0.2557625  | 0.0162807 | -0.410756468 | 0.00778379 |
| EV15  | rs4970712  | 1   | 92993547  | A       | C       | intron            | -0.2421577      | 0.0407493    | -0.2543546  | 0.0166989 | -0.411834108 | 0.00749455 |
| EV15  | rs6603981  | 1   | 92993807  | C       | T       | intron            | -0.2421669      | 0.0407415    | -0.2543633  | 0.0166952 | -0.411853913 | 0.00749179 |
| EV15  | rs6603982  | 1   | 92994033  | A       | G       | intron            | -0.2421263      | 0.0407452    | -0.2543553  | 0.0166984 | -0.411853913 | 0.00749179 |
| EV15  | rs6696173  | 1   | 92995727  | A       | C       | intron            | -0.2421808      | 0.0407289    | -0.2543693  | 0.0166921 | -0.411883442 | 0.00748718 |
| EV15  | rs989653   | 1   | 93003570  | A       | G       | intron            | -0.2360176      | 0.0497442    | -0.2630548  | 0.0150745 | -0.405547891 | 0.00994426 |
| EV15  | rs2151577  | 1   | 93004219  | A       | C       | intron            | -0.2422034      | 0.0407089    | -0.2543954  | 0.0166806 | -0.411938473 | 0.0074793  |
| EV15  | rs1570837  | 1   | 93006816  | C       | T       | intron            | -0.2422125      | 0.0407011    | -0.2544041  | 0.0166769 | -0.411958264 | 0.00747655 |
| EV15  | rs10735779 | 1   | 93008720  | G       | T       | intron            | -0.2422266      | 0.0406899    | -0.2544198  | 0.0166702 | -0.411978054 | 0.0074736  |
| EV15  | rs11804321 | 1   | 93009313  | C       | T       | intron            | 0.3675181       | 0.002901     | 0.2967644   | 0.0061972 | 0.427362726  | 0.0038798  |
| EV15  | rs7515577  | 1   | 93009438  | A       | C       | intron            | -0.2360482      | 0.0481046    | -0.2610643  | 0.0151239 | -0.408974563 | 0.00889929 |
| EV15  | rs6661134  | 1   | 93010908  | C       | T       | intron            | -0.2422449      | 0.0406735    | -0.2544371  | 0.0166629 | -0.412017624 | 0.0074683  |
| EV15  | rs6603984  | 1   | 93011572  | A       | G       | intron            | -0.2422449      | 0.0406735    | -0.2544371  | 0.0166629 | -0.412017624 | 0.0074683  |
| EV15  | rs6603985  | 1   | 93017159  | A       | T       | intron            | -0.2422457      | 0.0406724    | -0.2544442  | 0.0166606 | -0.412031207 | 0.00746628 |
| EV15  | rs6603987  | 1   | 93019313  | C       | T       | intron            | -0.2422505      | 0.0406676    | -0.2544393  | 0.0166612 | -0.412040927 | 0.00746444 |
| EV15  | rs6603988  | 1   | 93022283  | A       | G       | intron            | -0.2422505      | 0.0406676    | -0.2544393  | 0.0166612 | -0.412040927 | 0.00746444 |
| EV15  | rs1034219  | 1   | 93022678  | C       | G       | intron            | -0.2422505      | 0.0406676    | -0.2544393  | 0.0166612 | -0.412040927 | 0.00746444 |
| EV15  | rs4847377  | 1   | 93023150  | A       | C       | intron            | -0.2417852      | 0.0411933    | -0.2548135  | 0.016593  | -0.411710194 | 0.00757829 |
| EV15  | rs6422512  | 1   | 93024844  | C       | T       | intron            | -0.2422422      | 0.0406743    | -0.2544354  | 0.0166626 | -0.412034725 | 0.00746517 |
| EV15  | rs4847181  | 1   | 93028792  | C       | G       | intron            | -0.2422422      | 0.0406743    | -0.2544354  | 0.0166626 | -0.412034725 | 0.00746517 |
| EV15  | rs6603990  | 1   | 93030735  | C       | T       | intron            | -0.2422422      | 0.0406743    | -0.2544354  | 0.0166626 | -0.412034725 | 0.00746517 |
| EV15  | rs1556562  | 1   | 93034023  | G       | T       | intron            | -0.2357554      | 0.0475264    | -0.2533246  | 0.0177279 | -0.409258351 | 0.00905893 |
| EV15  | rs6692187  | 1   | 93035020  | C       | T       | intron            | -0.2422481      | 0.0406695    | -0.254438   | 0.0166616 | -0.412038663 | 0.00746467 |
| EV15  | rs17380378 | 1   | 93045977  | C       | T       | intron            | -0.3304459      | 0.0257362    | -0.40101    | 0.0033339 | -0.500794295 | 0.00921338 |
| CBLB  | rs1545304  | 3   | 105421823 | C       | T       | intron            | 0.2480966       | 0.0303447    | 0.194499    | 0.0589062 | 0.323474862  | 0.02640289 |
| CBLB  | rs9288815  | 3   | 105425910 | G       | T       | intron            | 0.2529693       | 0.0257017    | 0.1992775   | 0.05066   | 0.32479478   | 0.02532182 |
| CBLB  | rs2301043  | 3   | 105429152 | G       | T       | intron            | 0.2530404       | 0.0256226    | 0.1993504   | 0.0505209 | 0.324873657  | 0.02527558 |
| CBLB  | rs2301040  | 3   | 105430090 | G       | T       | intron            | 0.2527672       | 0.0257984    | 0.1991454   | 0.0507784 | 0.32445346   | 0.02547502 |
| CBLB  | rs7615317  | 3   | 105430251 | C       | T       | intron            | 0.2525095       | 0.0259587    | 0.1989285   | 0.0510381 | 0.324030082  | 0.02566816 |
| CBLB  | rs2301037  | 3   | 105430849 | A       | G       | intron            | 0.2523732       | 0.0260449    | 0.1988203   | 0.0511701 | 0.323808239  | 0.02577128 |
| CBLB  | rs7646159  | 3   | 105431215 | A       | G       | intron            | 0.1983366       | 0.0411659    | 0.1884865   | 0.0301277 | 0.226402142  | 0.06080019 |
| CBLB  | rs13073784 | 3   | 105432459 | C       | T       | intron            | 0.4152611       | 0.0029325    | 0.2380733   | 0.0587827 | 0.554875886  | 0.00212634 |
| CBLB  | rs7652702  | 3   | 105433359 | A       | G       | intron            | 0.2517028       | 0.0264875    | 0.1983377   | 0.0517927 | 0.322719954  | 0.02629482 |
| CBLB  | rs726443   | 3   | 105438320 | C       | T       | intron            | 0.1976365       | 0.041858     | 0.1879611   | 0.0305487 | 0.225288164  | 0.06198704 |
| CBLB  | rs726444   | 3   | 105438538 | C       | T       | intron            | 0.2414643       | 0.0337807    | 0.1880305   | 0.0656962 | 0.31572218   | 0.0300241  |
| CBLB  | rs2305035  | 3   | 105439026 | C       | T       | coding-synonymous | 0.2411299       | 0.0340323    | 0.1877483   | 0.0660988 | 0.315227905  | 0.03027219 |
| CBLB  | rs12493560 | 3   | 105444077 | C       | T       | intron            | 0.2395741       | 0.0352057    | 0.1863491   | 0.0681058 | 0.312842114  | 0.03148661 |
| CBLB  | rs9859953  | 3   | 105455366 | C       | T       | intron            | 0.1985186       | 0.0644411    | 0.1779063   | 0.0642864 | 0.281332339  | 0.03810016 |
| CBLB  | rs2289746  | 3   | 105455955 | A       | G       | intron            | 0.2023032       | 0.041476     | 0.1710573   | 0.0540756 | 0.213415845  | 0.08583896 |
| CBLB  | rs2399054  | 3   | 105461250 | C       | G       | intron            | 0.2366          | 0.0376237    | 0.1838237   | 0.071994  | 0.308249327  | 0.03399665 |
| CBLB  | rs9821956  | 3   | 105462289 | A       | G       | intron            | 0.1947409       | 0.0696578    | 0.1748502   | 0.0688813 | 0.274451609  | 0.04274541 |
| CBLB  | rs2301029  | 3   | 105469130 | A       | G       | intron            | 0.2376941       | 0.0374547    | 0.1838604   | 0.072804  | 0.310977832  | 0.03293912 |
| CBLB  | rs9872897  | 3   | 105473827 | A       | T       | intron            | 0.2398906       | 0.0365808    | 0.1845313   | 0.0728177 | 0.315899432  | 0.03088709 |
| CBLB  | rs1867190  | 3   | 105474535 | C       | T       | intron            | 0.2402762       | 0.0364345    | 0.1846689   | 0.0727982 | 0.316754386  | 0.03055149 |
| CBLB  | rs6780015  | 3   | 105502097 | A       | G       | intron            | 0.4003566       | 0.0048464    | 0.207602    | 0.1033952 | 0.587305135  | 0.00148572 |
| CBLB  | rs13084271 | 3   | 105544994 | A       | G       | intron            | 0.1549607       | 0.1081684    | 0.0530948   | 0.5366884 | 0.253266586  | 0.03546332 |
| IL7R  | rs11567699 | 5   | 35859011  | C       | G       | intron            | 0.1815023       | 0.0859985    | 0.1858533   | 0.0465162 | 0.192489969  | 0.14524035 |
| IL7R  | rs11567701 | 5   | 35859863  | G       | T       | intron            | 0.1815196       | 0.0859407    | 0.1858664   | 0.0464783 | 0.19262046   | 0.14493778 |
| IL7R  | rs11567751 | 5   | 35871684  | C       | T       | intron            | 0.1846587       | 0.0801551    | 0.1854033   | 0.0466136 | 0.19410441   | 0.1411589  |
| IL7R  | rs1494554  | 5   | 35873872  | A       | C       | intron            | 0.1846462       | 0.0800834    | 0.1851602   | 0.0468302 | 0.194004767  | 0.14122464 |
| IL7R  | rs3822733  | 5   | 35875134  | A       | G       | intron            | 0.1871822       | 0.0759294    | 0.189497    | 0.041827  | 0.198558209  | 0.13201092 |
| IL7R  | rs987107   | 5   | 35875227  | C       | T       | intron            | 0.1883047       | 0.0740182    | 0.1915468   | 0.039527  | 0.200715691  | 0.12765897 |
| IL7R  | rs3194051  | 5   | 35876274  | A       | G       | missense          | 0.1899537       | 0.0714456    | 0.1925965   | 0.0384074 | 0.200728307  | 0.12763342 |
| PARK2 | rs12198438 | 6   | 161796800 | C       | T       | intron            | -0.3741122      | 0.0273551    | -0.3028341  | 0.0515333 | -0.541110492 | 0.01253833 |
| PARK2 | rs12215774 | 6   | 161799508 | G       | T       | intron            | -0.30593        | 0.0677068    | -0.2443687  | 0.1083307 | -0.453540182 | 0.03148726 |
| PARK2 | rs17641094 | 6   | 161806657 | C       | T       | intron            | -0.3033285      | 0.0643429    | -0.2424668  | 0.1041499 | -0.425517377 | 0.03796125 |
| PARK2 | rs9295148  | 6   | 161870030 | A       | T       | intron            | -0.1273941      | 0.1890042    | -0.1699577  | 0.0486137 | -0.100155064 | 0.40346511 |
| PARK2 | rs9295149  | 6   | 161870174 | A       | T       | intron            | -0.127855       | 0.191684     | -0.1739005  | 0.0457691 | -0.097583755 | 0.41993555 |
| PARK2 | rs7774498  | 6   | 161887383 | G       | T       | intron            | 0.2018465       | 0.3809179    | 0.1132486   | 0.5785809 | 0.604826456  | 0.02762744 |
| PARK2 | rs718319   | 6   | 161887625 | A       | G       | intron            | -0.3467568      | 0.040743     | -0.2196656  | 0.1484495 | -0.455102769 | 0.03015181 |
| PARK2 | rs6906519  | 6   | 161891388 | C       | T       | intron            | -0.316504       | 0.0501274    | -0.3125952  | 0.0284747 | -0.4016349   | 0.04747006 |
| PARK2 | rs4709531  | 6   | 161900199 | C       | T       | intron            | -0.2491275      | 0.0286252    | -0.2307013  | 0.0221838 | -0.257972863 | 0.06599325 |
| PARK2 | rs9364598  | 6   | 161900496 | G       | T       | intron            | -0.2279947      | 0.0698708    | -0.2212762  | 0.0465162 | -0.281058364 | 0.0691577  |
| PARK2 | rs2315314  | 6   | 161902154 | C       | T       | intron            | -0.2106117      | 0.03056      |             |           |              |            |

## Sheet1

|       |            |   |           |   |     |        |            |            |            |            |              |            |
|-------|------------|---|-----------|---|-----|--------|------------|------------|------------|------------|--------------|------------|
| PARK2 | rs10455887 | 6 | 161910859 | C | T   | intron | -0.2002763 | 0.0348025  | -0.1610588 | 0.0560343  | -0.312959456 | 0.00885224 |
| PARK2 | rs4709532  | 6 | 161911816 | C | T   | intron | -0.2189811 | 0.0651521  | -0.2124064 | 0.0425249  | -0.280780491 | 0.05376251 |
| PARK2 | rs9346861  | 6 | 161912050 | C | T   | intron | -0.1863951 | 0.0522179  | -0.1487538 | 0.0807049  | -0.291494756 | 0.01562344 |
| PARK2 | rs10455786 | 6 | 161913322 | A | T   | intron | -0.1954247 | 0.0367846  | -0.1559642 | 0.0601788  | -0.300288038 | 0.01056294 |
| PARK2 | rs10455889 | 6 | 161913437 | G | T   | intron | -0.1951022 | 0.0369962  | -0.155749  | 0.0603759  | -0.299796476 | 0.0106446  |
| PARK2 | rs9365294  | 6 | 161913663 | C | G   | intron | -0.1947767 | 0.0373082  | -0.1553201 | 0.06107    | -0.299024499 | 0.01083648 |
| PARK2 | rs6928820  | 6 | 161920144 | C | G   | intron | -0.1735365 | 0.1333043  | -0.1330462 | 0.1899374  | -0.316406108 | 0.02700817 |
| PARK2 | rs693282   | 6 | 161923538 | A | G   | intron | -0.1765074 | 0.1265434  | -0.1373466 | 0.1755959  | -0.319593448 | 0.02547991 |
| PARK2 | rs9456679  | 6 | 161927524 | A | C   | intron | 0.2600615  | 0.0174626  | 0.2204516  | 0.0219779  | 0.284151463  | 0.03468989 |
| PARK2 | rs482845   | 6 | 161927886 | A | T   | intron | 0.2284458  | 0.0704848  | 0.2120931  | 0.0553294  | 0.307592164  | 0.04391567 |
| PARK2 | rs568893   | 6 | 161928772 | A | C   | intron | -0.2411025 | 0.0218012  | -0.1831527 | 0.0482807  | -0.333494122 | 0.01150836 |
| PARK2 | rs4708914  | 6 | 161930420 | A | G   | intron | -0.2552786 | 0.0143415  | -0.2013683 | 0.0286471  | -0.359337256 | 0.00575847 |
| PARK2 | rs548060   | 6 | 161936234 | A | G   | intron | 0.2993301  | 0.005773   | 0.2560857  | 0.0071651  | 0.303762184  | 0.02210198 |
| PARK2 | rs475158   | 6 | 161936277 | C | G   | intron | 0.2303602  | 0.0216405  | 0.1796705  | 0.0421921  | 0.241701833  | 0.05117545 |
| PARK2 | rs476105   | 6 | 161936397 | A | C   | intron | 0.2993262  | 0.0056779  | 0.2561578  | 0.0071415  | 0.30371952   | 0.02209982 |
| PARK2 | rs551962   | 6 | 161936686 | A | G   | intron | 0.2301532  | 0.0217516  | 0.1794524  | 0.0424306  | 0.241642807  | 0.05122958 |
| PARK2 | rs576613   | 6 | 161937048 | A | G   | intron | -0.2189139 | 0.0270754  | -0.1541131 | 0.0783829  | -0.291286968 | 0.01931652 |
| PARK2 | rs569463   | 6 | 161938219 | C | T   | intron | 0.2352557  | 0.018388   | 0.1870847  | 0.0336348  | 0.267301131  | 0.03009441 |
| PARK2 | rs11965294 | 6 | 161939595 | C | G   | intron | 0.3503692  | 0.0442798  | 0.2621212  | 0.0833176  | 0.268339289  | 0.21191547 |
| PARK2 | rs11965303 | 6 | 161939647 | C | T   | intron | 0.3506149  | 0.0441437  | 0.2623473  | 0.0830694  | 0.26885226   | 0.21109419 |
| PARK2 | rs523179   | 6 | 161940608 | C | T   | intron | 0.3010015  | 0.0060766  | 0.2546155  | 0.0083227  | 0.313509431  | 0.02042328 |
| PARK2 | rs526020   | 6 | 161940929 | A | T   | intron | 0.2939124  | 0.0073358  | 0.2501516  | 0.0094847  | 0.307265718  | 0.02301709 |
| PARK2 | rs1535055  | 6 | 161941681 | A | G   | intron | 0.2956976  | 0.00678    | 0.2520282  | 0.0086869  | 0.308838945  | 0.02169547 |
| PARK2 | rs510849   | 6 | 161942405 | C | T   | intron | 0.2447019  | 0.0161082  | 0.1956966  | 0.0292046  | 0.259352384  | 0.03879494 |
| PARK2 | rs16892698 | 6 | 161943365 | A | G   | intron | 0.3565462  | 0.0407857  | 0.2678514  | 0.0769008  | 0.28140815   | 0.19074523 |
| PARK2 | rs16892700 | 6 | 161944579 | A | G   | intron | 0.3574528  | 0.041262   | 0.2680506  | 0.0781692  | 0.283274539  | 0.19072095 |
| PARK2 | rs518666   | 6 | 161944771 | A | G   | intron | 0.2972055  | 0.0405521  | 0.2599687  | 0.0406272  | 0.305941068  | 0.0189821  |
| PARK2 | rs6455732  | 6 | 161945046 | O | A/T | intron | 0.2729167  | 0.0494304  | 0.250787   | 0.0397112  | 0.316243103  | 0.06013508 |
| PARK2 | rs543888   | 6 | 161949054 | A | G   | intron | 0.2403605  | 0.0611189  | 0.2069493  | 0.0654434  | 0.323173466  | 0.0376522  |
| PARK2 | rs496759   | 6 | 161949490 | C | T   | intron | 0.2911452  | 0.0421143  | 0.2334749  | 0.0625238  | 0.334055344  | 0.05463674 |
| PARK2 | rs482420   | 6 | 161953076 | C | T   | intron | 0.2547063  | 0.045656   | 0.2263331  | 0.0427019  | 0.332406885  | 0.03225628 |
| PARK2 | rs6900584  | 6 | 161954446 | A | G   | intron | 0.3042015  | 0.0282437  | 0.2526227  | 0.0371396  | 0.334905082  | 0.04694571 |
| PARK2 | rs495991   | 6 | 161955437 | A | G   | intron | -0.2280254 | 0.0634416  | -0.1662869 | 0.1242003  | -0.333798959 | 0.02660088 |
| PARK2 | rs475221   | 6 | 161958898 | A | G   | intron | 0.2176631  | 0.049013   | 0.1853775  | 0.0605793  | 0.183961931  | 0.18028727 |
| PARK2 | rs12527638 | 6 | 161958980 | A | G   | intron | -0.2046201 | 0.0644138  | -0.1480809 | 0.134877   | -0.285238467 | 0.03810193 |
| PARK2 | rs12527640 | 6 | 161959032 | A | G   | intron | -0.2048033 | 0.0640287  | -0.1477341 | 0.1355526  | -0.286486796 | 0.03717226 |
| PARK2 | rs17651062 | 6 | 161960834 | A | T   | intron | -0.2059063 | 0.0624658  | -0.1481442 | 0.1342663  | -0.289278279 | 0.03535132 |
| PARK2 | rs568670   | 6 | 161962121 | C | T   | intron | -0.3607144 | 0.0025169  | -0.2726881 | 0.0098339  | -0.366456472 | 0.01416258 |
| PARK2 | rs12198150 | 6 | 161962311 | A | C   | intron | -0.2612683 | 0.0193161  | -0.2089991 | 0.0376777  | -0.352340925 | 0.011837   |
| PARK2 | rs9458298  | 6 | 161964938 | C | T   | intron | -0.267885  | 0.016824   | -0.2153748 | 0.0330378  | -0.36035843  | 0.01044669 |
| PARK2 | rs509495   | 6 | 161970231 | A | T   | intron | 0.3167603  | 0.0216104  | 0.2394295  | 0.048226   | 0.319153783  | 0.05861107 |
| PARK2 | rs6455745  | 6 | 162061459 | A | G   | intron | 0.1216994  | 0.2497101  | 0.0437901  | 0.6397745  | 0.2836541    | 0.03282778 |
| PARK2 | rs10945763 | 6 | 162068264 | A | T   | intron | 0.1201081  | 0.2083003  | 0.0624232  | 0.4588751  | 0.297627899  | 0.01173891 |
| PARK2 | rs10945765 | 6 | 162068565 | G | T   | intron | 0.1209976  | 0.204835   | 0.063276   | 0.4526234  | 0.298414088  | 0.01150868 |
| PARK2 | rs6455751  | 6 | 162069098 | C | G   | intron | 0.0917098  | 0.3383102  | 0.0551439  | 0.5138814  | 0.271896437  | 0.02086406 |
| PARK2 | rs6455752  | 6 | 162069415 | C | T   | intron | 0.1252163  | 0.1893659  | 0.0661376  | 0.4322916  | 0.303576881  | 0.01016952 |
| PARK2 | rs2064523  | 6 | 162070717 | C | T   | intron | 0.1265551  | 0.1844692  | 0.0672658  | 0.4242438  | 0.304806327  | 0.00984211 |
| PARK2 | rs2064522  | 6 | 162070815 | C | T   | intron | 0.1270255  | 0.182756   | 0.0676448  | 0.4215382  | 0.305211051  | 0.00973235 |
| PARK2 | rs2076701  | 6 | 162071415 | C | T   | intron | 0.1275026  | 0.1810233  | 0.0680525  | 0.4186352  | 0.305584485  | 0.00963118 |
| PARK2 | rs2076700  | 6 | 162071438 | A | T   | intron | 0.1278788  | 0.1796761  | 0.0683581  | 0.4164772  | 0.305913425  | 0.00954463 |
| PARK2 | rs2281403  | 6 | 162071635 | A | G   | intron | 0.1283277  | 0.1780695  | 0.068757   | 0.4136668  | 0.306289991  | 0.00944582 |
| PARK2 | rs11756322 | 6 | 162072946 | A | G   | intron | 0.1348066  | 0.1569735  | 0.0723737  | 0.3893726  | 0.313198945  | 0.00794581 |
| PARK2 | rs7744246  | 6 | 162073062 | A | G   | intron | 0.1373348  | 0.1491849  | 0.0737921  | 0.3799986  | 0.315794513  | 0.00742366 |
| PARK2 | rs7763093  | 6 | 162073330 | C | G   | intron | 0.1404466  | 0.1399294  | 0.0755428  | 0.3685423  | 0.318900357  | 0.00682545 |
| PARK2 | rs7763253  | 6 | 162073422 | C | T   | intron | 0.1422116  | 0.1356903  | 0.0758035  | 0.3678412  | 0.322567843  | 0.00629776 |
| PARK2 | rs7763400  | 6 | 162073523 | C | T   | intron | 0.1406602  | 0.1394972  | 0.0756083  | 0.3681331  | 0.318984025  | 0.00681127 |
| PARK2 | rs6931101  | 6 | 162073739 | A | G   | intron | 0.1405976  | 0.1395097  | 0.0756059  | 0.3681483  | 0.318980237  | 0.00681196 |
| PARK2 | rs6931289  | 6 | 162073831 | A | G   | intron | 0.1412203  | 0.1378837  | 0.0761233  | 0.3650317  | 0.319849556  | 0.00667843 |
| PARK2 | rs17576062 | 6 | 162075716 | C | T   | intron | 0.1460994  | 0.125347   | 0.0802132  | 0.3405554  | 0.326372852  | 0.00568496 |
| PARK2 | rs11969183 | 6 | 162075919 | A | T   | intron | 0.1020544  | 0.3140248  | 0.0903423  | 0.3111773  | 0.248202966  | 0.04352182 |
| PARK2 | rs11966168 | 6 | 162076034 | C | G   | intron | 0.1024954  | 0.3120256  | 0.0906256  | 0.3097435  | 0.248936729  | 0.04293605 |
| PARK2 | rs11756024 | 6 | 162076539 | C | T   | intron | 0.1033033  | 0.3083389  | 0.0914252  | 0.3056009  | 0.250011576  | 0.04207683 |
| PARK2 | rs17576146 | 6 | 162076656 | G | T   | intron | 0.1199652  | 0.2104237  | 0.0714906  | 0.3973769  | 0.310354261  | 0.00840884 |
| PARK2 | rs17654202 | 6 | 162076794 | A | G   | intron | 0.1180445  | 0.2184144  | 0.0706636  | 0.4035501  | 0.309307544  | 0.00873825 |
| PARK2 | rs4134103  | 6 | 162076885 | A | G   | intron | 0.1491099  | 0.1191852  | 0.0823417  | 0.3298014  | 0.332677217  | 0.00501617 |
| PARK2 | rs6935513  | 6 | 162077347 | C | T   | intron | 0.089919   | 0.3728213  | 0.0607823  | 0.4942931  | 0.282788853  | 0.0224926  |
| PARK2 | rs9456701  | 6 | 162119957 | C | T   | intron | 0.1356519  | 0.2349603  | 0.0901578  | 0.3761715  | 0.32949578   | 0.02409309 |
| PARK2 | rs3016538  | 6 | 162236682 | C | T   | intron | 0.2634997  | 0.0281125  | 0.2032275  | 0.0574437  | 0.383668962  | 0.00897657 |
| PARK2 | rs4621613  | 6 | 162236779 | A | G   | intron | 0.294067   | 0.0157433  | 0.2363781  | 0.0295986  | 0.419241327  | 0.00510495 |
| PARK2 | rs1001092  | 6 | 162236866 | A | G   | intron | 0.2928054  | 0.0125298  | 0.200944   | 0.0618816  | 0.296786308  | 0.04651104 |
| PARK2 | rs3016537  | 6 | 162237644 | C | T   | intron | 0.3234974  | 0.00581169 | 0.1854755  | 0.0831169  | 0.300574347  | 0.0447878  |
| PARK2 | rs7755434  | 6 | 162237657 | A | G   | intron | 0.3231094  | 0.0058473  | 0.1853786  | 0.0831056  | 0.300069098  | 0.04502122 |
| PARK2 | rs7766680  | 6 | 162239191 | C | G   | intron | 0.2623134  | 0.0219305  | 0.2127824  | 0.0367409  | 0.377181979  | 0.00735807 |
| PARK2 | rs6931587  | 6 | 162247199 | A | T   | intron | 0.2261608  | 0.0208692  | 0.1749623  | 0.0428838  | 0.295769625  | 0.01425149 |
| PARK2 | rs10945780 | 6 | 162253698 | A | G   | intron | 0.4264367  | 0.0004408  | 0.3398405  | 0.0021622  | 0.36751024   | 0.01675913 |
| PARK2 | rs10155686 | 6 | 162254146 | A | G   | intron | 0.4140868  | 0.000519   | 0.3350163  | 0.0021532  | 0.350991215  | 0.02044122 |
| PARK2 | rs6913813  | 6 | 162254160 | A | G   | intron | 0.4081676  | 0.000692   | 0.3385237  | 0.0020959  | 0.334542057  | 0.02962077 |
| PARK2 | rs6915318  | 6 | 162254299 | C | T   | intron | 0.4162178  | 0.0005862  | 0.3497524  | 0.0016239  | 0.334230256  | 0.03143691 |
| PARK2 | rs9365344  | 6 | 162319145 | A | G   | intron | 0.2009728  | 0.0608506  | 0.1593477  | 0.08983694 | 0.278100878  | 0.03543774 |
| PARK2 | rs11759694 | 6 | 162405705 | C | G   | intron | 0.1583132  | 0.2295148  | 0.255267   | 0.0265341  | 0.126280177  | 0.43886395 |
| PARK2 | rs7753907  | 6 | 162449693 | G | T   | intron | -0.1559004 | 0.3883724  | -0.3352327 | 0.0427584  | -0.164156915 | 0.49490406 |
| PARK2 | rs1893545  | 6 | 162451368 | A | C   | intron | 0.1846634  | 0.1225205  | 0.1983255  | 0.0604653  | 0.295931444  | 0.04532823 |
| PARK2 | rs1893544  | 6 | 162451920 | C | G   | intron | 0.3204802  | 0.0971184  | 0.3128953  | 0.0651459  | 0.49064179   |            |

|       |            |   |           |   |   |        |            |           |            |           |              |            |
|-------|------------|---|-----------|---|---|--------|------------|-----------|------------|-----------|--------------|------------|
| PARK2 | rs884193   | 6 | 162452035 | C | T | intron | 0.320468   | 0.0971329 | 0.3128821  | 0.0651591 | 0.490627122  | 0.03864424 |
| PARK2 | rs10214526 | 6 | 162452605 | C | T | intron | 0.3396842  | 0.0818358 | 0.3286648  | 0.0550958 | 0.515223259  | 0.03197573 |
| PARK2 | rs11752640 | 6 | 162466869 | C | G | intron | 0.4482281  | 0.0172384 | 0.3992436  | 0.0150835 | 0.599266945  | 0.00818595 |
| PARK2 | rs11755261 | 6 | 162470970 | A | C | intron | 0.5010321  | 0.0126576 | 0.4570755  | 0.0094137 | 0.689790914  | 0.00491327 |
| PARK2 | rs11755283 | 6 | 162471096 | C | T | intron | 0.501977   | 0.0123655 | 0.4575056  | 0.0092991 | 0.690118134  | 0.00487263 |
| PARK2 | rs6940203  | 6 | 162543349 | A | G | intron | -0.2236349 | 0.1770296 | -0.3028323 | 0.0467302 | -0.171626972 | 0.41485476 |
| PARK2 | rs6455798  | 6 | 162551917 | A | G | intron | -0.2392491 | 0.1419097 | -0.3074511 | 0.0399424 | -0.193914172 | 0.35269591 |
| PARK2 | rs6455799  | 6 | 162552314 | C | G | intron | -0.2394383 | 0.1414945 | -0.3074827 | 0.0398648 | -0.19416529  | 0.35200088 |
| PARK2 | rs6455800  | 6 | 162552371 | A | G | intron | -0.2394692 | 0.1414432 | -0.3074964 | 0.0398564 | 0.292024972  | 0.03418038 |
| PARK2 | rs7751044  | 6 | 162552531 | G | T | intron | -0.2404073 | 0.1400588 | -0.3081032 | 0.0395639 | -0.19475666  | 0.3507348  |
| PARK2 | rs10945798 | 6 | 162564668 | A | T | intron | 0.6421662  | 0.0065869 | 0.5681145  | 0.0055582 | 0.727285458  | 0.00897071 |
| PARK2 | rs1954918  | 6 | 162571447 | A | T | intron | -0.6228794 | 0.0695211 | -0.5402597 | 0.1100095 | -1.20097435  | 0.01656038 |
| PARK2 | rs2000752  | 6 | 162573421 | A | G | intron | -0.6103047 | 0.0733702 | -0.5305701 | 0.1140743 | -1.195303848 | 0.01671354 |
| PARK2 | rs2849578  | 6 | 162579837 | C | T | intron | -0.7492927 | 0.0423021 | -0.5962486 | 0.0963973 | -1.439690715 | 0.00634569 |
| PARK2 | rs1893549  | 6 | 162579859 | A | C | intron | -0.7522964 | 0.0396849 | -0.5987097 | 0.0910188 | -1.40740761  | 0.0064678  |
| PARK2 | rs2849597  | 6 | 162580090 | A | G | intron | -0.7518713 | 0.0395589 | -0.5992002 | 0.0903014 | -1.402631656 | 0.00655654 |
| PARK2 | rs1893556  | 6 | 162584753 | C | T | intron | -0.72215   | 0.0189568 | -0.602905  | 0.0395411 | -1.141816354 | 0.00840291 |
| PARK2 | rs2849589  | 6 | 162585754 | A | G | intron | -0.735468  | 0.0281611 | -0.54691   | 0.0847894 | -1.174244958 | 0.0121842  |
| PARK2 | rs9355985  | 6 | 162589633 | A | G | intron | -0.814063  | 0.016871  | -0.6751128 | 0.0382098 | -1.120043047 | 0.01539311 |
| PARK2 | rs9365378  | 6 | 162589665 | A | G | intron | -0.8141698 | 0.016784  | -0.6748942 | 0.0381282 | -1.119591561 | 0.01534474 |
| PARK2 | rs2023080  | 6 | 162592030 | A | G | intron | -0.8142859 | 0.0165335 | -0.6745244 | 0.0376827 | -1.11514496  | 0.01534302 |
| PARK2 | rs4709577  | 6 | 162592548 | A | G | intron | -0.8139257 | 0.015327  | -0.6704404 | 0.0357461 | -1.093899941 | 0.01506656 |
| PARK2 | rs1574210  | 6 | 162594511 | A | G | intron | -0.7491787 | 0.0136163 | -0.6164451 | 0.0298676 | -0.9822603   | 0.012544   |
| PARK2 | rs871387   | 6 | 162594941 | A | C | intron | -0.7485058 | 0.0136101 | -0.6162459 | 0.0297662 | -0.980658892 | 0.01260949 |
| PARK2 | rs9347595  | 6 | 162595632 | A | G | intron | -0.746726  | 0.0167246 | -0.620296  | 0.0349706 | -1.023610516 | 0.0143927  |
| PARK2 | rs7453183  | 6 | 162595657 | C | T | intron | -0.7399298 | 0.0201207 | -0.6144904 | 0.0414338 | -1.007732257 | 0.01646416 |
| PARK2 | rs2023077  | 6 | 162601447 | A | T | intron | -0.9271721 | 0.0103739 | -0.7339523 | 0.033398  | -1.089400691 | 0.01828338 |
| PARK2 | rs9365381  | 6 | 162602088 | C | T | intron | -0.9339094 | 0.0101901 | -0.7400317 | 0.0329269 | -1.098654683 | 0.01774706 |
| PARK2 | rs4708942  | 6 | 162602454 | C | T | intron | -0.9364667 | 0.0101023 | -0.7416507 | 0.0328358 | -1.104340598 | 0.01731111 |
| PARK2 | rs1954945  | 6 | 162604909 | A | C | intron | -0.9480819 | 0.0104702 | -0.7553137 | 0.0333828 | -1.118520113 | 0.01755037 |
| PARK2 | rs11961127 | 6 | 162610330 | G | T | intron | -0.8859058 | 0.0214166 | -0.6921403 | 0.0651193 | -0.706304383 | 0.12007001 |
| PARK2 | rs9347599  | 6 | 162611892 | C | T | intron | -0.8829553 | 0.0216875 | -0.6887162 | 0.0662335 | -0.703692735 | 0.12131724 |
| PARK2 | rs9365384  | 6 | 162614264 | A | T | intron | 0.4959974  | 0.007707  | 0.3685764  | 0.0215779 | 0.566381425  | 0.01385582 |
| PARK2 | rs9355387  | 6 | 162621262 | C | T | intron | 0.4830509  | 0.0091986 | 0.3663143  | 0.0220611 | 0.564092169  | 0.01380603 |
| PARK2 | rs1801474  | 6 | 162622197 | A | G | intron | -0.8975185 | 0.0222251 | -0.7007026 | 0.0670586 | -0.72159557  | 0.1206273  |
| PARK2 | rs2023073  | 6 | 162632171 | A | G | intron | 0.3489572  | 0.0102618 | 0.2713433  | 0.0325438 | 0.399798593  | 0.01958343 |
| PARK2 | rs9458493  | 6 | 162693397 | A | T | intron | -0.3441551 | 0.0089437 | -0.3566221 | 0.0024231 | -0.57973765  | 0.00082681 |
| PARK2 | rs4708948  | 6 | 162698927 | C | T | intron | -0.2485643 | 0.1248128 | -0.2879334 | 0.049449  | -0.372550109 | 0.06680058 |
| PARK2 | rs9458499  | 6 | 162713427 | C | T | intron | -0.3295019 | 0.0152409 | -0.3061253 | 0.0112136 | -0.563007308 | 0.00149401 |
| PARK2 | rs1893557  | 6 | 162714281 | C | G | intron | -0.2998039 | 0.0234858 | -0.2850318 | 0.0156024 | -0.460169602 | 0.00702167 |
| PARK2 | rs4235937  | 6 | 162729177 | A | G | intron | -0.1950748 | 0.0539734 | -0.1723472 | 0.0570071 | -0.336926553 | 0.01107694 |
| PARK2 | rs6930668  | 6 | 162731343 | C | T | intron | -0.1968455 | 0.051402  | -0.1775991 | 0.0495154 | -0.340333485 | 0.01028418 |
| PARK2 | rs12214761 | 6 | 162732259 | G | T | intron | -0.1542485 | 0.1106979 | -0.1768038 | 0.0398652 | -0.271735042 | 0.02472448 |
| PARK2 | rs7762805  | 6 | 162733428 | C | G | intron | 0.2811367  | 0.0934237 | 0.1723355  | 0.242205  | 0.433311492  | 0.03813876 |
| PARK2 | rs7744521  | 6 | 162733551 | A | T | intron | 0.2798271  | 0.0960395 | 0.1616888  | 0.2742206 | 0.438311406  | 0.0355454  |
| PARK2 | rs7748665  | 6 | 162733743 | A | G | intron | 0.2794345  | 0.0964778 | 0.1609694  | 0.2763227 | 0.438173723  | 0.03553624 |
| PARK2 | rs7752706  | 6 | 162733752 | C | T | intron | -0.2448983 | 0.0109898 | -0.2273872 | 0.0082848 | -0.414673408 | 0.00075897 |
| PARK2 | rs9458508  | 6 | 162735917 | G | T | intron | -0.2418414 | 0.0094957 | -0.2210938 | 0.0077201 | -0.360856584 | 0.00208782 |
| PARK2 | rs12189990 | 6 | 162736190 | A | G | intron | -0.2419905 | 0.0094549 | -0.2212089 | 0.0076912 | -0.361134167 | 0.00207277 |
| PARK2 | rs6455807  | 6 | 162736336 | A | G | intron | -0.1994645 | 0.0467484 | -0.1703163 | 0.0571265 | -0.339135967 | 0.00979396 |
| PARK2 | rs7760647  | 6 | 162736476 | A | G | intron | -0.174994  | 0.0667913 | -0.1406816 | 0.1046933 | -0.25422497  | 0.0279609  |
| PARK2 | rs7740928  | 6 | 162736500 | C | G | intron | -0.1791227 | 0.0658476 | -0.1416586 | 0.1023248 | -0.276375553 | 0.02739986 |
| PARK2 | rs7771045  | 6 | 162738256 | A | G | intron | -0.1834606 | 0.0593845 | -0.1479703 | 0.0878155 | -0.27689761  | 0.02683797 |
| PARK2 | rs9458515  | 6 | 162738705 | C | T | intron | -0.2509713 | 0.0070984 | -0.2316105 | 0.0052839 | -0.366324259 | 0.00178381 |
| PARK2 | rs9458518  | 6 | 162739171 | C | T | intron | -0.1815058 | 0.0620915 | -0.1472534 | 0.0892647 | -0.274319881 | 0.02822342 |
| PARK2 | rs9458519  | 6 | 162739309 | G | T | intron | -0.1796676 | 0.0647209 | -0.1454943 | 0.0930479 | -0.272785294 | 0.02907712 |
| PARK2 | rs9456766  | 6 | 162740106 | A | C | intron | -0.1791933 | 0.0653711 | -0.1453021 | 0.0934266 | -0.271797526 | 0.02961532 |
| PARK2 | rs9365401  | 6 | 162741134 | C | T | intron | -0.2228387 | 0.0200381 | -0.1780085 | 0.0375057 | -0.346631593 | 0.00497152 |
| PARK2 | rs6930880  | 6 | 162744659 | C | T | intron | -0.2170112 | 0.0233903 | -0.1707838 | 0.0456659 | -0.342435777 | 0.00551457 |
| PARK2 | rs13198166 | 6 | 162750015 | G | T | intron | -0.1792009 | 0.060026  | -0.1413568 | 0.0937675 | -0.22919767  | 0.04792241 |
| PARK2 | rs1954950  | 6 | 162751907 | C | T | intron | -0.2049289 | 0.0527059 | -0.1687281 | 0.0734294 | -0.355383779 | 0.01012542 |
| PARK2 | rs2000753  | 6 | 162752050 | C | T | intron | -0.213632  | 0.0358463 | -0.1772101 | 0.051249  | -0.354038293 | 0.00802308 |
| PARK2 | rs9347623  | 6 | 162752693 | A | G | intron | -0.2562819 | 0.0063566 | -0.2404365 | 0.0041924 | -0.409502446 | 0.0007071  |
| PARK2 | rs9346911  | 6 | 162757114 | C | T | intron | -0.1779729 | 0.2232566 | -0.2751295 | 0.0373313 | -0.259583066 | 0.16524369 |
| PARK2 | rs6935149  | 6 | 162767682 | A | G | intron | -0.1672674 | 0.0868527 | -0.1860842 | 0.0325418 | -0.250381143 | 0.04401968 |
| PARK2 | rs9458548  | 6 | 162851541 | C | T | intron | -0.2903402 | 0.1505253 | -0.3615274 | 0.0483344 | -0.308885983 | 0.22589418 |
| PARK2 | rs9365422  | 6 | 162851647 | A | G | intron | -0.2916959 | 0.1487203 | -0.3632127 | 0.0473902 | -0.308527104 | 0.22656902 |
| PARK2 | rs9347637  | 6 | 162851663 | A | G | intron | -0.2924041 | 0.1477636 | -0.3640613 | 0.0469098 | -0.308376399 | 0.22684908 |
| PARK2 | rs9365424  | 6 | 162852205 | A | C | intron | -0.292995  | 0.1469983 | -0.3648064 | 0.0465063 | -0.308152809 | 0.22727133 |
| PARK2 | rs9356015  | 6 | 162854593 | C | T | intron | -0.295481  | 0.1443184 | -0.3688953 | 0.044573  | -0.304950788 | 0.23342196 |
| PARK2 | rs9365426  | 6 | 162854618 | A | G | intron | -0.2958575 | 0.1438623 | -0.3694584 | 0.0442875 | -0.304647982 | 0.23402614 |
| PARK2 | rs9365427  | 6 | 162854752 | A | G | intron | -0.2971126 | 0.1422051 | -0.3711343 | 0.0433782 | -0.303817028 | 0.2355219  |
| PARK2 | rs9365428  | 6 | 162854763 | A | G | intron | -0.2975288 | 0.1416382 | -0.3716325 | 0.0431009 | -0.30363727  | 0.23584284 |
| PARK2 | rs7758844  | 6 | 162860350 | C | T | intron | -0.2995653 | 0.1388829 | -0.3741958 | 0.0416879 | -0.302678018 | 0.23758954 |
| PARK2 | rs9356021  | 6 | 162861831 | C | G | intron | -0.2987145 | 0.1403068 | -0.3742057 | 0.0417905 | -0.301033332 | 0.2406841  |
| PARK2 | rs6905594  | 6 | 162866977 | C | T | intron | -0.29722   | 0.1477155 | -0.3756305 | 0.0441435 | -0.282229312 | 0.27939617 |
| PARK2 | rs9364659  | 6 | 162867818 | C | G | intron | -0.297788  | 0.1473029 | -0.3759634 | 0.0441306 | -0.281592991 | 0.28086531 |
| PARK2 | rs16888779 | 6 | 162868383 | C | T | intron | -0.303292  | 0.1434505 | -0.3779557 | 0.0450994 | -0.2786223   | 0.29045755 |
| PARK2 | rs9458560  | 6 | 162874140 | A | G | intron | -0.1085816 | 0.3845663 | -0.0206152 | 0.0853335 | -0.352177956 | 0.02676957 |
| PARK2 | rs7454474  | 6 | 162889975 | A | C | intron | -0.0703828 | 0.5369508 | -0.2252907 | 0.0267019 | 0.056608587  | 0.6927154  |
| PARK2 | rs6923407  | 6 | 162892755 | C | T | intron | 0.1544637  | 0.1434428 | 0.2226412  | 0.017247  | 0.055730263  | 0.66994675 |
| PARK2 | rs4709623  | 6 | 162895752 | A | G | intron | 0.17606    | 0.0739489 | 0.2237977  | 0.0104826 | 0.10720997   | 0.37926126 |
| PARK2 | rs9364660  | 6 | 162899571 | C | G | intron | 0.1753569  | 0.0750734 | 0.2231441  | 0.0107011 | 0.107179371  | 0.37937573 |

|       |            |   |           |   |   |        |            |           |            |            |              |             |
|-------|------------|---|-----------|---|---|--------|------------|-----------|------------|------------|--------------|-------------|
| PARK2 | rs4493732  | 6 | 162904165 | C | T | intron | -0.0961206 | 0.3100095 | -0.1952588 | 0.0210165  | -0.014653385 | 0.90185127  |
| PARK2 | rs1893113  | 6 | 162906921 | A | G | intron | -0.1001751 | 0.2897637 | -0.1991501 | 0.0185653  | -0.014345419 | 0.9038994   |
| PARK2 | rs4709632  | 6 | 162909935 | G | T | intron | 0.1759729  | 0.0745049 | 0.2273763  | 0.0094087  | 0.099338455  | 0.416229664 |
| PARK2 | rs7758475  | 6 | 162912388 | C | G | intron | 0.1455232  | 0.1338206 | 0.2102392  | 0.0145933  | 0.067350966  | 0.57519931  |
| PARK2 | rs2155500  | 6 | 162914277 | A | G | intron | -0.1095523 | 0.2480153 | -0.2163875 | 0.0107971  | -0.018283706 | 0.87854924  |
| PARK2 | rs9346916  | 6 | 162914938 | C | T | intron | 0.2068841  | 0.0461703 | 0.2435824  | 0.007995   | 0.148918313  | 0.24614173  |
| PARK2 | rs9346917  | 6 | 162914986 | C | T | intron | 0.1794062  | 0.0660588 | 0.2377271  | 0.0060346  | 0.098712236  | 0.41329798  |
| PARK2 | rs10945839 | 6 | 162915180 | C | T | intron | -0.1096711 | 0.2475155 | -0.216476  | 0.010768   | -0.01845245  | 0.87743891  |
| PARK2 | rs2023004  | 6 | 162916549 | A | G | intron | 0.1791423  | 0.0664199 | 0.2378452  | 0.0060029  | 0.0988169    | 0.41278587  |
| PARK2 | rs1893109  | 6 | 162917651 | G | T | intron | 0.1788239  | 0.0668628 | 0.2376665  | 0.0060316  | 0.098835884  | 0.41269287  |
| PARK2 | rs1893108  | 6 | 162917677 | A | C | intron | 0.1784015  | 0.0675002 | 0.2372211  | 0.006124   | 0.098858161  | 0.41258367  |
| PARK2 | rs1893107  | 6 | 162917942 | A | G | intron | 0.1726199  | 0.0822079 | 0.2434657  | 0.0057524  | 0.098170605  | 0.42429345  |
| PARK2 | rs4708963  | 6 | 162918792 | C | T | intron | -0.1098635 | 0.2467876 | -0.2162353 | 0.0108738  | -0.01859525  | 0.87650009  |
| PARK2 | rs9346918  | 6 | 162920212 | C | T | intron | -0.1304805 | 0.1673518 | -0.2314712 | 0.0062762  | -0.032560691 | 0.78353043  |
| PARK2 | rs9356028  | 6 | 162920373 | A | C | intron | -0.1304779 | 0.1673595 | -0.2314657 | 0.0062774  | -0.032560691 | 0.78353043  |
| PARK2 | rs9356029  | 6 | 162920439 | C | T | intron | -0.1304721 | 0.1673789 | -0.2314614 | 0.0062784  | -0.032560691 | 0.78353043  |
| PARK2 | rs9347655  | 6 | 162921182 | C | T | intron | 0.172518   | 0.0768876 | 0.2279968  | 0.0083706  | 0.096349605  | 0.42483262  |
| PARK2 | rs9347656  | 6 | 162921563 | C | T | intron | -0.1267608 | 0.1795541 | -0.2244738 | 0.007971   | -0.032555805 | 0.7835635   |
| PARK2 | rs6920074  | 6 | 162922136 | C | T | intron | 0.1692453  | 0.0821412 | 0.2246887  | 0.0092397  | 0.095074053  | 0.43104232  |
| PARK2 | rs6934419  | 6 | 162926081 | A | G | intron | -0.1139875 | 0.2534643 | -0.2384272 | 0.0077677  | -0.019190419 | 0.87912869  |
| PARK2 | rs6930136  | 6 | 162928898 | C | T | intron | 0.3538897  | 0.0436946 | 0.4042969  | 0.0088759  | 0.203951558  | 0.34786039  |
| PARK2 | rs7767254  | 6 | 162954674 | G | T | intron | 0.30868    | 0.0304952 | 0.2720263  | 0.0287116  | 0.370739793  | 0.04697242  |
| PARK2 | rs7763118  | 6 | 162954720 | A | G | intron | 0.3085279  | 0.0305557 | 0.2719915  | 0.0287104  | 0.370627633  | 0.04698904  |
| PARK2 | rs4273664  | 6 | 162955494 | G | T | intron | 0.3089409  | 0.030336  | 0.2724625  | 0.0284348  | 0.370639893  | 0.04698138  |
| PARK2 | rs13193473 | 6 | 162966852 | A | C | intron | 0.3331656  | 0.0192572 | 0.3024815  | 0.0148572  | 0.38223797   | 0.03779333  |
| PARK2 | rs13206549 | 6 | 162978032 | G | T | intron | 0.3227832  | 0.0231782 | 0.2892087  | 0.0197024  | 0.380884831  | 0.04155403  |
| PARK2 | rs13207671 | 6 | 162979056 | A | G | intron | 0.2817421  | 0.0428177 | 0.2818545  | 0.0204091  | 0.337710733  | 0.06560045  |
| PARK2 | rs13201023 | 6 | 162981381 | C | G | intron | 0.2877936  | 0.0377921 | 0.2921805  | 0.0158276  | 0.148220846  | 0.26292282  |
| PARK2 | rs13209728 | 6 | 162997533 | A | C | intron | 0.2756257  | 0.0464534 | 0.2843047  | 0.0186976  | 0.31232132   | 0.08743173  |
| PARK2 | rs13213408 | 6 | 162998049 | A | T | intron | 0.2751894  | 0.0467833 | 0.2838679  | 0.0188702  | 0.311546291  | 0.08820459  |
| PARK2 | rs13199223 | 6 | 163001083 | C | T | intron | 0.2748993  | 0.0470029 | 0.2835773  | 0.0189852  | 0.311014188  | 0.08872738  |
| PARK2 | rs2846550  | 6 | 163009018 | G | T | intron | 0.1740841  | 0.4147353 | 0.3674709  | 0.0462161  | -0.148032519 | 0.59311375  |
| PARK2 | rs13204439 | 6 | 163015358 | A | C | intron | 0.2721834  | 0.0490481 | 0.2807958  | 0.0200852  | 0.305831622  | 0.0937685   |
| PARK2 | rs2846542  | 6 | 163021497 | A | G | intron | 0.1742439  | 0.4144255 | 0.3674275  | 0.0462817  | -0.148430642 | 0.59230445  |
| PARK2 | rs13212608 | 6 | 163032128 | C | T | intron | 0.2703581  | 0.0556743 | 0.2835133  | 0.0215485  | 0.305528168  | 0.10136048  |
| PARK2 | rs13191362 | 6 | 163033350 | A | G | intron | 0.2359474  | 0.1066566 | 0.2534059  | 0.0465951  | 0.27359297   | 0.15686404  |
| PARK2 | rs13215538 | 6 | 163037975 | C | T | intron | 0.2351729  | 0.1077493 | 0.2528611  | 0.0470276  | 0.272449835  | 0.1586211   |
| PARK2 | rs13192894 | 6 | 163052444 | A | T | intron | 0.2330487  | 0.1143662 | 0.2542455  | 0.0478075  | 0.270153857  | 0.16614086  |
| PARK2 | rs13218900 | 6 | 163081638 | C | T | intron | 0.2331387  | 0.1122742 | 0.2567144  | 0.0445856  | 0.279471054  | 0.15044804  |
| PARK2 | rs13202339 | 6 | 163081812 | A | G | intron | 0.2304539  | 0.1195836 | 0.2545031  | 0.0482886  | 0.126876794  | 0.32446368  |
| PARK2 | rs2156257  | 6 | 163100710 | A | C | intron | 0.2261696  | 0.1283374 | 0.2557705  | 0.0482743  | 0.272479641  | 0.16669939  |
| PARK2 | rs13192618 | 6 | 163132822 | C | T | intron | -0.266949  | 0.0577899 | -0.2903989 | 0.017827   | -0.298317606 | 0.10988887  |
| PARK2 | rs4260737  | 8 | 163137746 | C | T | intron | 0.2592767  | 0.0993195 | 0.2906861  | 0.0337626  | 0.321630262  | 0.12408033  |
| CSMD1 | rs584541   | 8 | 2802745   | C | T | intron | -0.191249  | 0.1512392 | -0.2473022 | 0.0397309  | -0.394122365 | 0.02584204  |
| CSMD1 | rs596775   | 8 | 2803172   | A | G | intron | -0.2015314 | 0.1294872 | -0.2548427 | 0.0336488  | -0.410416619 | 0.01976081  |
| CSMD1 | rs612788   | 8 | 2803337   | A | G | intron | -0.1949834 | 0.143726  | -0.2565757 | 0.0331497  | -0.386668614 | 0.02858972  |
| CSMD1 | rs12682210 | 8 | 2827474   | A | G | intron | 0.3294195  | 0.105323  | 0.1973164  | 0.2710622  | 0.559475066  | 0.01922942  |
| CSMD1 | rs10089936 | 8 | 2901470   | C | T | intron | 0.2420688  | 0.0492967 | 0.1784954  | 0.0995972  | 0.399174925  | 0.00875617  |
| CSMD1 | rs10092843 | 8 | 2902276   | A | G | intron | 0.3491688  | 0.0392251 | 0.2778745  | 0.0600424  | 0.580861765  | 0.00366661  |
| CSMD1 | rs11136562 | 8 | 2902570   | C | T | intron | 0.3486654  | 0.0394881 | 0.277477   | 0.0603801  | 0.580226724  | 0.00370372  |
| CSMD1 | rs11136563 | 8 | 2902600   | A | T | intron | 0.2875144  | 0.1043284 | 0.1947906  | 0.2083788  | 0.504591668  | 0.01535253  |
| CSMD1 | rs10109575 | 8 | 2906958   | C | T | intron | 0.2251485  | 0.2018619 | 0.1447729  | 0.3496661  | 0.419826468  | 0.04401154  |
| CSMD1 | rs10081578 | 8 | 2911102   | C | T | intron | 0.1946571  | 0.109851  | 0.1306832  | 0.2215334  | 0.34156096   | 0.02334052  |
| CSMD1 | rs2199277  | 8 | 2913043   | G | T | intron | 0.1572689  | 0.1873055 | 0.0975012  | 0.3522664  | 0.304077587  | 0.04099164  |
| CSMD1 | rs10866945 | 8 | 2913384   | C | T | intron | 0.1578809  | 0.1858614 | 0.0978353  | 0.350917   | 0.305284329  | 0.04032814  |
| CSMD1 | rs10092374 | 8 | 2919891   | C | T | intron | 0.1877318  | 0.2417284 | 0.0649236  | 0.6468579  | 0.37822347   | 0.04962333  |
| CSMD1 | rs6995874  | 8 | 2920183   | G | T | intron | 0.1878109  | 0.2415015 | 0.0649206  | 0.6468556  | 0.378078889  | 0.04968268  |
| CSMD1 | rs9792185  | 8 | 2934736   | A | C | intron | -0.1194532 | 0.2465846 | -0.2016144 | 0.0300674  | -0.118482596 | 0.35368822  |
| CSMD1 | rs9792343  | 8 | 2934858   | A | G | intron | -0.1193185 | 0.2472233 | -0.2014557 | 0.0302348  | -0.118325318 | 0.35445408  |
| CSMD1 | rs12681676 | 8 | 2934938   | A | G | intron | -0.1104807 | 0.2968464 | -0.1933475 | 0.0435784  | -0.109966024 | 0.4044345   |
| CSMD1 | rs17079516 | 8 | 3024140   | A | T | intron | -0.3334237 | 0.1238092 | -0.2741194 | 0.1575392  | -0.544332572 | 0.04684603  |
| CSMD1 | rs17079527 | 8 | 3025657   | C | T | intron | -0.3661591 | 0.0426219 | -0.2102412 | 0.1847386  | -0.495476575 | 0.02628041  |
| CSMD1 | rs259857   | 8 | 3037377   | C | G | intron | 0.2800534  | 0.0343063 | 0.2195441  | 0.060337   | 0.300192218  | 0.06923126  |
| CSMD1 | rs10216986 | 8 | 3045108   | C | T | intron | -0.2465724 | 0.2803919 | -0.4063472 | 0.0498668  | -0.041325525 | 0.88052554  |
| CSMD1 | rs10086940 | 8 | 3049799   | A | G | intron | 0.3070772  | 0.006272  | 0.191312   | 0.0543026  | 0.327734321  | 0.02006572  |
| CSMD1 | rs7016896  | 8 | 3049850   | A | G | intron | 0.54001    | 0.0096892 | 0.2181796  | 0.2361861  | 0.51791796   | 0.03890792  |
| CSMD1 | rs6558727  | 8 | 3050022   | C | T | intron | 0.5439427  | 0.0090871 | 0.2214992  | 0.2283934  | 0.519972726  | 0.03789031  |
| CSMD1 | rs7834670  | 8 | 3050903   | A | G | intron | 0.5399257  | 0.0093494 | 0.2418171  | 0.1863374  | 0.505374975  | 0.0412217   |
| CSMD1 | rs983778   | 8 | 3051168   | C | G | intron | 0.5767289  | 0.0065473 | 0.2311809  | 0.216897   | 0.546509481  | 0.03152256  |
| CSMD1 | rs898503   | 8 | 3052895   | A | G | intron | 0.2665409  | 0.0205205 | 0.1358858  | 0.1827701  | 0.311988634  | 0.03115641  |
| CSMD1 | rs898505   | 8 | 3053053   | C | T | intron | 0.2634571  | 0.0218433 | 0.1341704  | 0.1876649  | 0.308689951  | 0.03259682  |
| CSMD1 | rs11136590 | 8 | 3053429   | G | T | intron | 0.263135   | 0.0219682 | 0.1340366  | 0.1879658  | 0.308314443  | 0.03272827  |
| CSMD1 | rs9785101  | 8 | 3053876   | G | T | intron | 0.0228381  | 0.1326486 | 0.1923019  | 0.30627899 | 0.03374562   |             |
| CSMD1 | rs9785182  | 8 | 3054039   | C | T | intron | 0.2608703  | 0.022894  | 0.1325612  | 0.1917626  | 0.297250556  | 0.03839921  |
| CSMD1 | rs9785103  | 8 | 3054181   | G | T | intron | 0.2601504  | 0.0232888 | 0.1321249  | 0.1935263  | 0.304741972  | 0.03433387  |
| CSMD1 | rs7835243  | 8 | 3054763   | A | G | intron | 0.2537378  | 0.0268551 | 0.1282813  | 0.2066908  | 0.297102565  | 0.03898078  |
| CSMD1 | rs7823098  | 8 | 3054804   | C | T | intron | 0.2562821  | 0.0253842 | 0.1297045  | 0.2017372  | 0.299593977  | 0.03737624  |
| CSMD1 | rs1867044  | 8 | 3062695   | C | T | intron | 0.5060579  | 0.0306077 | 0.1633845  | 0.4326453  | 0.553017531  | 0.05011724  |
| CSMD1 | rs1867043  | 8 | 3062871   | C | T | intron | 0.5065429  | 0.0305875 | 0.1634653  | 0.4328088  | 0.554454244  | 0.04967626  |
| CSMD1 | rs12216867 | 8 | 3088577   | C | T | intron | 0.1437693  | 0.172321  | 0.2099552  | 0.024515   | 0.142572596  | 0.27157872  |
| CSMD1 | rs12541333 | 8 | 3089581   | A | C | intron | 0.1273606  | 0.2134147 | 0.1943781  | 0.0324093  | 0.144401082  | 0.25466925  |
| CSMD1 | rs7838993  | 8 | 3090514   | A | C | intron | 0.1320316  | 0.2088131 | 0.1996205  | 0.0321921  | 0.170434021  | 0.19132227  |
| CSMD1 | rs13277198 | 8 | 3096056   | A | T | intron | 0.1335676  | 0.2206771 | 0.220782   | 0.0224198  | 0.144859518  | 0.28411181  |

|       |            |   |         |   |   |        |            |           |            |           |              |            |
|-------|------------|---|---------|---|---|--------|------------|-----------|------------|-----------|--------------|------------|
| CSMD1 | rs10104274 | 8 | 3101916 | A | G | intron | 0.2491158  | 0.1021149 | 0.2435496  | 0.0823203 | 0.485730667  | 0.01694291 |
| CSMD1 | rs10107546 | 8 | 3102159 | C | T | intron | 0.2036173  | 0.1411848 | 0.2030404  | 0.1086432 | 0.380466787  | 0.03899661 |
| CSMD1 | rs17391551 | 8 | 3102207 | C | T | intron | 0.2267952  | 0.1970065 | 0.1828396  | 0.2512914 | 0.489224034  | 0.03451823 |
| CSMD1 | rs4875411  | 8 | 3103110 | C | T | intron | 0.2279368  | 0.1942428 | 0.1831932  | 0.2498535 | 0.490727038  | 0.03382504 |
| CSMD1 | rs17079690 | 8 | 3104536 | C | G | intron | 0.2303248  | 0.1874767 | 0.1835012  | 0.2468876 | 0.492723137  | 0.03229673 |
| CSMD1 | rs17079692 | 8 | 3106012 | C | G | intron | 0.223593   | 0.1995838 | 0.1763626  | 0.2635215 | 0.482487043  | 0.03467737 |
| CSMD1 | rs12542735 | 8 | 3127042 | C | T | intron | 0.1487526  | 0.1368529 | 0.1134621  | 0.197331  | 0.307642227  | 0.01291486 |
| CSMD1 | rs12549534 | 8 | 3127088 | C | T | intron | 0.147628   | 0.149857  | 0.102344   | 0.2626796 | 0.301819993  | 0.02117412 |
| CSMD1 | rs12542756 | 8 | 3127119 | C | T | intron | 0.1481443  | 0.1483484 | 0.1027475  | 0.2606984 | 0.302331982  | 0.02093338 |
| CSMD1 | rs13265444 | 8 | 3127416 | C | G | intron | 0.1468901  | 0.183998  | 0.0988629  | 0.3158251 | 0.288922743  | 0.04020329 |
| CSMD1 | rs2099845  | 8 | 3134373 | A | T | intron | 0.1140773  | 0.3031304 | 0.1216384  | 0.213573  | 0.286554637  | 0.03564488 |
| CSMD1 | rs7813353  | 8 | 3135135 | A | C | intron | 0.1513557  | 0.156432  | 0.1043662  | 0.2741077 | 0.315064963  | 0.02098357 |
| CSMD1 | rs17391851 | 8 | 3135398 | C | T | intron | 0.1342132  | 0.4623112 | 0.0771579  | 0.6373124 | 0.488815703  | 0.04349463 |
| CSMD1 | rs10110184 | 8 | 3135739 | C | T | intron | 0.1289674  | 0.2462029 | 0.119494   | 0.2238562 | 0.314998135  | 0.02196336 |
| CSMD1 | rs6558751  | 8 | 3140972 | C | T | intron | 0.3455379  | 0.3252706 | -0.0685533 | 0.8246974 | 1.181991477  | 0.04050771 |
| CSMD1 | rs6558756  | 8 | 3153093 | A | G | intron | -0.7176661 | 0.0015564 | -0.5718051 | 0.0091553 | -0.9345597   | 0.00301116 |
| CSMD1 | rs4875549  | 8 | 3153534 | C | T | intron | -0.7130337 | 0.0016172 | -0.5697111 | 0.0091598 | -0.928252115 | 0.00308088 |
| CSMD1 | rs4875568  | 8 | 3157117 | A | G | intron | -0.7254736 | 0.0009695 | -0.5791715 | 0.0063301 | -0.905873506 | 0.00276759 |
| CSMD1 | rs6981554  | 8 | 3157466 | C | G | intron | -0.7253882 | 0.0009662 | -0.5787221 | 0.0063424 | -0.905743822 | 0.00276013 |
| CSMD1 | rs4626625  | 8 | 3158767 | C | G | intron | -0.7127921 | 0.0011867 | -0.5702097 | 0.0070737 | -0.884718794 | 0.00332755 |
| CSMD1 | rs718119   | 8 | 3159709 | A | G | intron | -0.6312919 | 0.0048726 | -0.5217384 | 0.0145937 | -0.69184753  | 0.01855278 |
| CSMD1 | rs4875572  | 8 | 3159793 | A | T | intron | -0.570501  | 0.009269  | -0.438178  | 0.0330315 | -0.608678178 | 0.03053083 |
| CSMD1 | rs4875574  | 8 | 3160221 | C | T | intron | 0.3606582  | 0.0391968 | 0.1620264  | 0.3033287 | 0.488582387  | 0.03085112 |
| CSMD1 | rs3896041  | 8 | 3160880 | C | G | intron | -0.5320574 | 0.0137305 | -0.3979441 | 0.0473554 | -0.566300412 | 0.03919854 |
| CSMD1 | rs7013739  | 8 | 3162195 | A | G | intron | -0.5271491 | 0.0169892 | -0.408409  | 0.0476664 | -0.557143803 | 0.04852908 |
| CSMD1 | rs1503276  | 8 | 3162736 | A | T | intron | -0.5147753 | 0.0250539 | -0.404873  | 0.0620168 | -0.527868126 | 0.07639366 |
| CSMD1 | rs6985450  | 8 | 3163580 | C | G | intron | -0.5275703 | 0.0169636 | -0.4085766 | 0.0477628 | -0.55743669  | 0.04869534 |
| CSMD1 | rs12545749 | 8 | 3164333 | C | G | intron | -0.2109808 | 0.0368968 | -0.1551534 | 0.0884583 | -0.179515135 | 0.06299018 |
| CSMD1 | rs1503279  | 8 | 3164642 | C | T | intron | -0.5051544 | 0.0318886 | -0.4260453 | 0.0554906 | -0.521048398 | 0.08828768 |
| CSMD1 | rs1393843  | 8 | 3165814 | A | C | intron | -0.4370426 | 0.0488364 | -0.338971  | 0.0975844 | -0.453922102 | 0.01648007 |
| CSMD1 | rs10086567 | 8 | 3167217 | C | T | intron | -0.5151728 | 0.0236839 | -0.4296437 | 0.0437707 | -0.548836118 | 0.06105661 |
| CSMD1 | rs4875592  | 8 | 3168573 | C | T | intron | -0.5087461 | 0.026054  | -0.4310304 | 0.0439882 | -0.543153573 | 0.06542475 |
| CSMD1 | rs13268043 | 8 | 3168770 | C | T | intron | -0.5086057 | 0.0261413 | -0.431248  | 0.0439664 | -0.54281546  | 0.06572963 |
| CSMD1 | rs2161748  | 8 | 3169183 | C | G | intron | -0.466871  | 0.0317127 | -0.3904942 | 0.0523372 | -0.517888266 | 0.06253865 |
| CSMD1 | rs1910376  | 8 | 3169567 | A | G | intron | -0.5067756 | 0.0267848 | -0.4316555 | 0.0443966 | -0.54098686  | 0.06698426 |
| CSMD1 | rs1910377  | 8 | 3169686 | C | G | intron | -0.5061449 | 0.0270204 | -0.431675  | 0.0400252 | -0.540546271 | 0.06735327 |
| CSMD1 | rs924735   | 8 | 3172225 | G | T | intron | -0.500826  | 0.0292543 | -0.4326847 | 0.0445461 | -0.534006239 | 0.07250207 |
| CSMD1 | rs924738   | 8 | 3172588 | A | G | intron | -0.5015372 | 0.0292251 | -0.432835  | 0.0447784 | -0.534069981 | 0.07301601 |
| CSMD1 | rs894333   | 8 | 3174707 | C | T | intron | -0.2061376 | 0.0367237 | -0.146753  | 0.0977763 | -0.148703287 | 0.23333451 |
| CSMD1 | rs924726   | 8 | 3176240 | C | T | intron | -0.1973636 | 0.0465716 | -0.1370804 | 0.1230705 | -0.13559967  | 0.2780453  |
| CSMD1 | rs4875609  | 8 | 3177530 | C | T | intron | -0.1959293 | 0.0476889 | -0.1358175 | 0.1255572 | -0.133228669 | 0.28537985 |
| CSMD1 | rs17079993 | 8 | 3185762 | C | T | intron | -0.4331234 | 0.0276867 | -0.3507771 | 0.0572357 | -0.616995565 | 0.02362596 |
| CSMD1 | rs7350119  | 8 | 3220249 | A | C | intron | 0.2307788  | 0.0518818 | 0.2030094  | 0.0509838 | -0.736855734 | 0.01500983 |
| CSMD1 | rs17065931 | 8 | 3220688 | C | G | intron | 0.2456252  | 0.0447044 | 0.2068207  | 0.0542443 | 0.355929213  | 0.01722715 |
| CSMD1 | rs17065997 | 8 | 3232603 | C | T | intron | 0.2339223  | 0.0599125 | 0.141048   | 0.1956544 | 0.331526769  | 0.02804763 |
| CSMD1 | rs6990027  | 8 | 3264509 | C | T | intron | -0.2670715 | 0.0615545 | -0.261169  | 0.0438628 | -0.339095562 | 0.06269513 |
| CSMD1 | rs10101928 | 8 | 3264780 | A | C | intron | -0.270285  | 0.0585455 | -0.2654323 | 0.0406864 | -0.340094981 | 0.06203672 |
| CSMD1 | rs17066021 | 8 | 3266561 | A | G | intron | -0.2589823 | 0.0652671 | -0.2812956 | 0.0278418 | -0.30389612  | 0.09217926 |
| CSMD1 | rs10098061 | 8 | 3273292 | C | G | intron | -0.3013329 | 0.0401443 | -0.2428355 | 0.0686161 | -0.345752217 | 0.05867788 |
| CSMD1 | rs1393845  | 8 | 3287064 | C | T | intron | 0.2342565  | 0.026052  | 0.1764591  | 0.062008  | 0.214513016  | 0.10090793 |
| CSMD1 | rs1499686  | 8 | 3322528 | C | T | intron | 0.2589432  | 0.044652  | 0.2307695  | 0.0568726 | 0.25295261   | 0.11929045 |
| CSMD1 | rs4875723  | 8 | 3331794 | G | T | intron | 0.237532   | 0.0481721 | 0.2200843  | 0.042983  | 0.183289483  | 0.22094173 |
| CSMD1 | rs6558783  | 8 | 3348663 | A | G | intron | 0.5342239  | 0.0936586 | 0.3289308  | 0.2335508 | 0.824433454  | 0.03786538 |
| CSMD1 | rs10093733 | 8 | 3349496 | C | G | intron | -0.8497739 | 0.0452185 | -0.7730016 | 0.0557808 | -1.183591286 | 0.08397235 |
| CSMD1 | rs6993945  | 8 | 3349599 | A | G | intron | -0.3837862 | 0.0355206 | -0.3386089 | 0.0442964 | -0.410305041 | 0.0817612  |
| CSMD1 | rs10097026 | 8 | 3349967 | C | G | intron | -0.8559898 | 0.0428726 | -0.7794693 | 0.0532266 | -1.173543953 | 0.08427477 |
| CSMD1 | rs9314494  | 8 | 3350062 | A | C | intron | -0.3889479 | 0.032549  | -0.3414572 | 0.0401306 | -0.412833035 | 0.07899792 |
| CSMD1 | rs10106674 | 8 | 3361471 | A | G | intron | 0.399156   | 0.0340158 | 0.3530574  | 0.0366965 | 0.325862561  | 0.16294089 |
| CSMD1 | rs7827872  | 8 | 3372149 | C | G | intron | -0.4032715 | 0.0382135 | -0.3257438 | 0.0650889 | -0.454494635 | 0.06867536 |
| CSMD1 | rs11785154 | 8 | 3374624 | C | G | intron | -0.3137199 | 0.0434632 | -0.2910874 | 0.0402378 | -0.320927193 | 0.10953473 |
| CSMD1 | rs13271783 | 8 | 3384744 | C | G | intron | -0.2072081 | 0.0332393 | -0.1740356 | 0.0445604 | -0.172395133 | 0.15150049 |
| CSMD1 | rs6999415  | 8 | 3390144 | A | G | intron | 0.2913361  | 0.0467055 | 0.2744627  | 0.0322264 | 0.384062051  | 0.02780205 |
| CSMD1 | rs7010391  | 8 | 3392354 | A | G | intron | 0.243646   | 0.0803974 | 0.2527576  | 0.0394833 | 0.329751863  | 0.04797791 |
| CSMD1 | rs10102248 | 8 | 3426669 | C | T | intron | -0.1606896 | 0.161676  | -0.1039528 | 0.3169347 | -0.287650838 | 0.04863954 |
| CSMD1 | rs11785740 | 8 | 3427849 | C | T | intron | 0.2188987  | 0.0537252 | 0.0448686  | 0.6564139 | 0.305356447  | 0.03348304 |
| CSMD1 | rs13273515 | 8 | 3428652 | C | T | intron | 0.1818542  | 0.0742754 | 0.0967208  | 0.2894924 | 0.259572066  | 0.04381361 |
| CSMD1 | rs931200   | 8 | 3456098 | G | T | intron | 0.6107991  | 0.0337984 | 0.4564745  | 0.0661241 | 0.379435661  | 0.27863239 |
| CSMD1 | rs7826633  | 8 | 3462864 | A | G | intron | -0.2798426 | 0.0319391 | -0.2321244 | 0.042687  | -0.302466112 | 0.06004527 |
| CSMD1 | rs7842233  | 8 | 3462875 | A | G | intron | -0.2792094 | 0.0320214 | -0.2311791 | 0.0431258 | -0.300434224 | 0.06106698 |
| CSMD1 | rs1471610  | 8 | 3465842 | C | T | intron | -0.2806245 | 0.0196657 | -0.2442219 | 0.0209962 | -0.309077879 | 0.0368384  |
| CSMD1 | rs2981367  | 8 | 3466405 | C | T | intron | -0.2792623 | 0.0201827 | -0.2427038 | 0.0217249 | -0.30776641  | 0.03757995 |
| CSMD1 | rs2469340  | 8 | 3466649 | A | C | intron | -0.2666146 | 0.026484  | -0.2338327 | 0.0269707 | -0.291626805 | 0.04874851 |
| CSMD1 | rs2469338  | 8 | 3466917 | A | C | intron | 0.2753018  | 0.035576  | 0.202044   | 0.0795352 | 0.212369096  | 0.18295236 |
| CSMD1 | rs2449241  | 8 | 3467705 | G | T | intron | -0.2665072 | 0.026475  | -0.2328172 | 0.0257501 | -0.290743961 | 0.04947279 |
| CSMD1 | rs2469328  | 8 | 3468313 | C | G | intron | -0.2646394 | 0.0270056 | -0.2281511 | 0.0302553 | -0.286742985 | 0.05248274 |
| CSMD1 | rs2046219  | 8 | 3474635 | C | G | intron | 0.4147785  | 0.0423811 | 0.3306908  | 0.0638063 | 0.326488355  | 0.19343379 |
| CSMD1 | rs11786532 | 8 | 3479419 | C | T | intron | -0.2391661 | 0.3065581 | -0.3632344 | 0.0716675 | -0.554309456 | 0.04526362 |
| CSMD1 | rs17066612 | 8 | 3479586 | C | G | intron | -0.2393088 | 0.3062328 | -0.363419  | 0.0714971 | -0.554391577 | 0.04521569 |
| CSMD1 | rs7015502  | 8 | 3481012 | C | G | intron | -0.2789772 | 0.2290325 | -0.3838502 | 0.0550124 | -0.590977018 | 0.03201661 |
| CSMD1 | rs10503211 | 8 | 3482393 | C | G | intron | -0.2783546 | 0.2209327 | -0.3623798 | 0.0649313 | -0.56882395  | 0.03464809 |
| CSMD1 | rs10503212 | 8 | 3482569 | C | T | intron | -0.2782386 | 0.2209623 | -0.3620497 | 0.0650752 | -0.568370898 | 0.03469729 |
| CSMD1 | rs10503213 | 8 | 3482631 | C | G | intron | -0.2782225 | 0.2209489 | -0.3619175 | 0.0651507 | -0.568149134 | 0.03474652 |
| CSMD1 | rs11781825 | 8 | 3483933 | C | T | intron | -0.2769072 | 0.2220707 | -0.3591113 | 0.0665995 | -0.564579769 | 0.03526863 |

|       |            |   |         |   |     |        |            |           |            |           |              |            |
|-------|------------|---|---------|---|-----|--------|------------|-----------|------------|-----------|--------------|------------|
| CSMD1 | rs17066686 | 8 | 3487710 | C | T   | intron | -0.2653494 | 0.2324742 | -0.3333904 | 0.0821995 | -0.533836522 | 0.04078228 |
| CSMD1 | rs11778669 | 8 | 3488044 | A | G   | intron | -0.2649306 | 0.2315713 | -0.2897901 | 0.1295211 | -0.535323597 | 0.03753277 |
| CSMD1 | rs17066733 | 8 | 3504117 | A | G   | intron | 0.416492   | 0.0275499 | 0.3709413  | 0.0252936 | 0.410187146  | 0.0794532  |
| CSMD1 | rs1482209  | 8 | 3505173 | A | T   | intron | 0.2992963  | 0.1133438 | 0.3811155  | 0.0201061 | 0.304924197  | 0.17367378 |
| CSMD1 | rs17066746 | 8 | 3505451 | C | G   | intron | -0.6953547 | 0.076254  | -0.7783282 | 0.0483332 | -0.529865397 | 0.29875685 |
| CSMD1 | rs2469408  | 8 | 3505646 | C | T   | intron | 0.2880658  | 0.1223894 | 0.3624179  | 0.0250346 | 0.295205029  | 0.18186614 |
| CSMD1 | rs9657394  | 8 | 3507746 | C | G   | intron | 0.2743744  | 0.1291883 | 0.3523943  | 0.0247253 | 0.273807719  | 0.20384061 |
| CSMD1 | rs2469402  | 8 | 3508332 | C | G   | intron | 0.2741831  | 0.1287122 | 0.3522518  | 0.0244914 | 0.273674428  | 0.20322699 |
| CSMD1 | rs2449204  | 8 | 3508477 | A | G   | intron | 0.2745304  | 0.1277732 | 0.3526557  | 0.0241453 | 0.273515324  | 0.20288813 |
| CSMD1 | rs2469397  | 8 | 3509181 | A | G   | intron | 0.2747717  | 0.1263431 | 0.3531913  | 0.0234839 | 0.272618013  | 0.20284673 |
| CSMD1 | rs2449206  | 8 | 3510737 | C | G   | intron | 0.2209649  | 0.1907484 | 0.3141036  | 0.0320341 | 0.198315561  | 0.32819541 |
| CSMD1 | rs1384197  | 8 | 3511245 | A | G   | intron | 0.2208326  | 0.1893334 | 0.314128   | 0.0313993 | 0.197992716  | 0.3273169  |
| CSMD1 | rs1384196  | 8 | 3511278 | A | G/T | intron | 0.1682109  | 0.1696038 | 0.2235956  | 0.04682   | 0.145628436  | 0.35571968 |
| CSMD1 | rs2469395  | 8 | 3511972 | A | G   | intron | 0.2202612  | 0.1884986 | 0.3139228  | 0.0307651 | 0.196738061  | 0.3283686  |
| CSMD1 | rs2469394  | 8 | 3512187 | C | G   | intron | 0.2201705  | 0.1883021 | 0.3137205  | 0.0307282 | 0.196986653  | 0.3273254  |
| CSMD1 | rs2449209  | 8 | 3512299 | C | T   | intron | 0.2234542  | 0.1828987 | 0.3158522  | 0.0300459 | 0.202442386  | 0.31557656 |
| CSMD1 | rs2469390  | 8 | 3513337 | A | G   | intron | 0.3044564  | 0.0273779 | 0.3410415  | 0.0050378 | 0.316496655  | 0.06435516 |
| CSMD1 | rs2449211  | 8 | 3513452 | C | T   | intron | 0.2962333  | 0.0768937 | 0.3886704  | 0.0075655 | 0.246709056  | 0.22337353 |
| CSMD1 | rs2469385  | 8 | 3515449 | A | G   | intron | 0.1735079  | 0.1634827 | 0.2768939  | 0.0128828 | 0.13961694   | 0.36683209 |
| CSMD1 | rs900225   | 8 | 3517516 | C | T   | intron | 0.3979907  | 0.0830897 | 0.5009866  | 0.0117363 | 0.129071224  | 0.25734861 |
| CSMD1 | rs2624082  | 8 | 3518457 | C | G   | intron | 0.3414285  | 0.1259067 | 0.4731809  | 0.0144741 | 0.484339119  | 0.07483545 |
| CSMD1 | rs2624084  | 8 | 3518739 | C | G   | intron | 0.3790072  | 0.0872551 | 0.483253   | 0.0120668 | 0.50103048   | 0.06417933 |
| CSMD1 | rs2623587  | 8 | 3556268 | G | T   | intron | -0.3071021 | 0.0478988 | -0.1458285 | 0.291842  | -0.397087136 | 0.04864719 |
| CSMD1 | rs17326699 | 8 | 3564912 | A | G   | intron | 0.3002541  | 0.0383269 | 0.2370987  | 0.0653633 | 0.331572656  | 0.07144894 |
| CSMD1 | rs11996752 | 8 | 3576390 | A | G   | intron | 0.3680727  | 0.0180334 | 0.246068   | 0.0760834 | 0.421926898  | 0.03264997 |
| CSMD1 | rs17067155 | 8 | 3582759 | C | G   | intron | 0.4261043  | 0.0497332 | 0.3096472  | 0.1012357 | 0.337894664  | 0.18924397 |
| CSMD1 | rs2623741  | 8 | 3587188 | C | G   | intron | 0.3046635  | 0.0088476 | 0.2145244  | 0.0361433 | 0.287026857  | 0.04063366 |
| CSMD1 | rs2897573  | 8 | 3587957 | C | T   | intron | 0.2350824  | 0.0271055 | 0.1927027  | 0.0407113 | 0.170432805  | 0.18825066 |
| CSMD1 | rs6558814  | 8 | 3589281 | C | G   | intron | 0.2958485  | 0.0164779 | 0.246764   | 0.0222756 | 0.351989961  | 0.01656475 |
| CSMD1 | rs1994048  | 8 | 3592380 | A | G   | intron | 0.2156574  | 0.0428596 | 0.196913   | 0.0370315 | 0.140563985  | 0.28066409 |
| CSMD1 | rs12716597 | 8 | 3593413 | A | G   | intron | 0.2074331  | 0.0530639 | 0.1951082  | 0.0403476 | 0.127953898  | 0.32880199 |
| CSMD1 | rs12716598 | 8 | 3593436 | C | T   | intron | 0.216995   | 0.0413066 | 0.1979378  | 0.0358885 | 0.141143619  | 0.27771548 |
| CSMD1 | rs2981369  | 8 | 3594287 | C | T   | intron | 0.0411427  | 0.0411427 | 0.1982169  | 0.0356733 | 0.140967831  | 0.2783752  |
| CSMD1 | rs2466281  | 8 | 3594382 | C | G   | intron | 0.2172574  | 0.0411647 | 0.198542   | 0.0354436 | 0.140666816  | 0.27959038 |
| CSMD1 | rs2720820  | 8 | 3594438 | C | T   | intron | 0.2174159  | 0.0410604 | 0.1987967  | 0.0352489 | 0.140726935  | 0.27949757 |
| CSMD1 | rs12676490 | 8 | 3599212 | C | G   | intron | -0.0995035 | 0.450859  | -0.0371571 | 0.7539263 | -0.363979123 | 0.04343491 |
| CSMD1 | rs17067312 | 8 | 3600882 | C | T   | intron | -0.0916081 | 0.4938642 | -0.0375338 | 0.7549537 | -0.359203624 | 0.04936165 |
| CSMD1 | rs12549613 | 8 | 3601137 | C | G   | intron | 0.3196109  | 0.0455546 | 0.2813428  | 0.0433515 | 0.32066481   | 0.10132133 |
| CSMD1 | rs1871820  | 8 | 3623999 | C | G   | intron | 0.1494884  | 0.1188858 | 0.120434   | 0.0536387 | 0.237766564  | 0.04853297 |
| CSMD1 | rs11774223 | 8 | 3666582 | C | T   | intron | -0.141339  | 0.2001711 | -0.2161115 | 0.0284796 | -0.126159124 | 0.36204249 |
| CSMD1 | rs2954201  | 8 | 3671549 | A | G   | intron | 0.4110022  | 0.0296297 | 0.3023648  | 0.0686288 | 0.338824476  | 0.18167138 |
| CSMD1 | rs10092945 | 8 | 3679868 | C | G   | intron | -0.1544623 | 0.186663  | -0.2284784 | 0.0287196 | -0.113641353 | 0.44220164 |
| CSMD1 | rs2930357  | 8 | 3709660 | A | G   | intron | -0.1666283 | 0.1346198 | -0.1084218 | 0.2760444 | -0.301217714 | 0.03651404 |
| CSMD1 | rs10100809 | 8 | 3712585 | A | G   | intron | -0.1557084 | 0.1561675 | -0.1510437 | 0.1288021 | -0.332178167 | 0.02069778 |
| CSMD1 | rs17067746 | 8 | 3713004 | A | C   | intron | -0.2101193 | 0.2177756 | -0.0313612 | 0.8356686 | -0.529256478 | 0.01500847 |
| CSMD1 | rs10092398 | 8 | 3713043 | C | T   | intron | -0.1612785 | 0.1539903 | -0.1610991 | 0.1164865 | -0.353249558 | 0.01687792 |
| CSMD1 | rs13265637 | 8 | 3713503 | A | C   | intron | -0.2025738 | 0.0815593 | -0.1678506 | 0.1115413 | -0.435448381 | 0.00432807 |
| CSMD1 | rs6558825  | 8 | 3715437 | C | G   | intron | -0.1734238 | 0.1632308 | -0.1995156 | 0.0742334 | -0.331622807 | 0.039096   |
| CSMD1 | rs17067771 | 8 | 3715901 | A | G   | intron | -0.2548871 | 0.1584054 | -0.0355953 | 0.8245717 | -0.593982603 | 0.01089515 |
| CSMD1 | rs2930353  | 8 | 3717468 | C | T   | intron | -0.1643349 | 0.1240305 | -0.1283706 | 0.1844055 | -0.327331227 | 0.01801894 |
| CSMD1 | rs17067779 | 8 | 3717980 | G | T   | intron | -0.2335743 | 0.2074543 | -0.014256  | 0.3088554 | -0.556863694 | 0.01801924 |
| CSMD1 | rs6558826  | 8 | 3719976 | A | G   | intron | -0.1379763 | 0.206591  | -0.1290729 | 0.1915062 | -0.303156463 | 0.03374379 |
| CSMD1 | rs2975366  | 8 | 3720473 | C | T   | intron | -0.183328  | 0.1105054 | -0.14007   | 0.1783223 | -0.396641959 | 0.00827991 |
| CSMD1 | rs13276234 | 8 | 3723184 | A | C   | intron | -0.219026  | 0.1999664 | -0.0386901 | 0.7988911 | -0.545521062 | 0.01230081 |
| CSMD1 | rs13276828 | 8 | 3723345 | C | G   | intron | -0.218389  | 0.2012456 | -0.0382952 | 0.8008769 | -0.544705222 | 0.01241423 |
| CSMD1 | rs13274695 | 8 | 3723378 | A | G   | intron | -0.2170045 | 0.2035238 | -0.0372004 | 0.8061538 | -0.543375277 | 0.01243336 |
| CSMD1 | rs13274973 | 8 | 3723462 | C | G   | intron | -0.1914175 | 0.2602792 | -0.0207002 | 0.8908231 | -0.508771392 | 0.01814279 |
| CSMD1 | rs13249429 | 8 | 3723608 | A | C   | intron | -0.1922786 | 0.2557851 | -0.0234936 | 0.875542  | -0.512711891 | 0.01670665 |
| CSMD1 | rs13250493 | 8 | 3723628 | A | C   | intron | -0.1860891 | 0.2708417 | -0.0195692 | 0.8960517 | -0.504013542 | 0.01835667 |
| CSMD1 | rs17067801 | 8 | 3723922 | A | G   | intron | -0.1858655 | 0.2707923 | -0.0197577 | 0.8949046 | -0.50414531  | 0.01814204 |
| CSMD1 | rs4515573  | 8 | 3724248 | A | C   | intron | -0.1855441 | 0.2713988 | -0.0195901 | 0.8957362 | -0.503709554 | 0.01817176 |
| CSMD1 | rs4275246  | 8 | 3724442 | C | G   | intron | -0.1946448 | 0.2759062 | -0.0397056 | 0.8034974 | -0.514603079 | 0.02526759 |
| CSMD1 | rs4379474  | 8 | 3724455 | A | G   | intron | -0.1937423 | 0.2783066 | -0.0392969 | 0.8055208 | -0.514468256 | 0.02534305 |
| CSMD1 | rs17067807 | 8 | 3724695 | C | G   | intron | -0.1745399 | 0.2999572 | -0.0183018 | 0.9023182 | -0.499258375 | 0.0188888  |
| CSMD1 | rs4495446  | 8 | 3725428 | C | G   | intron | -0.1749033 | 0.2974147 | -0.0182855 | 0.9020658 | -0.498673978 | 0.01849262 |
| CSMD1 | rs13268401 | 8 | 3726055 | A | G   | intron | -0.1752464 | 0.2961298 | -0.0185642 | 0.9005111 | 0.251187241  | 0.07940079 |
| CSMD1 | rs4146932  | 8 | 3726907 | A | C   | intron | -0.1143246 | 0.273492  | 0.0156215  | 0.8665181 | -0.305760912 | 0.02040971 |
| CSMD1 | rs7821201  | 8 | 3728613 | C | T   | intron | -0.205081  | 0.2383392 | -0.0436385 | 0.776733  | -0.591896144 | 0.00745875 |
| CSMD1 | rs13259787 | 8 | 3731642 | A | G   | intron | -0.2657608 | 0.1292922 | -0.1052879 | 0.5011472 | -0.726595463 | 0.00160498 |
| CSMD1 | rs13258665 | 8 | 3732359 | A | G   | intron | -0.2682891 | 0.126135  | -0.1086092 | 0.4884708 | -0.731460659 | 0.0015264  |
| CSMD1 | rs13261048 | 8 | 3732413 | C | G   | intron | -0.2689468 | 0.1251853 | -0.1095643 | 0.4846846 | -0.732728532 | 0.00149965 |
| CSMD1 | rs13261072 | 8 | 3732438 | C | T   | intron | -0.2693776 | 0.1247213 | -0.1100812 | 0.4828274 | -0.733554954 | 0.00149021 |
| CSMD1 | rs6996498  | 8 | 3732601 | A | G   | intron | -0.1696018 | 0.1219653 | -0.0393049 | 0.6871032 | -0.414889449 | 0.00301702 |
| CSMD1 | rs13250531 | 8 | 3733157 | C | G   | intron | -0.266981  | 0.143498  | -0.116951  | 0.4737703 | -0.721421958 | 0.00238851 |
| CSMD1 | rs13258918 | 8 | 3733598 | C | G   | intron | -0.2715772 | 0.1382224 | -0.1248813 | 0.4466128 | -0.727091127 | 0.002347   |
| CSMD1 | rs10089344 | 8 | 3736913 | C | T   | intron | -0.1374207 | 0.1963214 | -0.040997  | 0.6648973 | -0.30773241  | 0.02261386 |
| CSMD1 | rs1608368  | 8 | 3740065 | A | G   | intron | -0.3146414 | 0.1138026 | -0.1727895 | 0.3339255 | -0.732403536 | 0.00442345 |
| CSMD1 | rs2627432  | 8 | 3751882 | C | T   | intron | -0.3004134 | 0.1209336 | -0.1805767 | 0.2993244 | -0.747121729 | 0.00324158 |
| CSMD1 | rs2627425  | 8 | 3759339 | C | T   | intron | -0.1484058 | 0.1800369 | -0.0781505 | 0.428234  | -0.299829459 | 0.03129504 |
| CSMD1 | rs17067892 | 8 | 3763540 | C | T   | intron | -0.2090979 | 0.2365211 | -0.1336687 | 0.3982683 | -0.625797096 | 0.00740873 |
| CSMD1 | rs2688286  | 8 | 3764588 | A | G   | intron | -0.1321079 | 0.2429084 | -0.0291282 | 0.7717793 | -0.308732846 | 0.02855749 |
| CSMD1 | rs17063173 | 8 | 3765414 | C | T   | intron | -0.2359125 | 0.1642231 | -0.2022399 | 0.18628   | -0.535703736 | 0.01492101 |
| CSMD1 | rs17067905 | 8 | 3766302 | A | G   | intron | -0.1762189 | 0.3572173 | -0.0877168 | 0.6069961 | -0.60053711  | 0.01598775 |

|       |            |   |         |   |     |        |            |           |            |           |              |             |
|-------|------------|---|---------|---|-----|--------|------------|-----------|------------|-----------|--------------|-------------|
| CSMD1 | rs3889169  | 8 | 3766612 | C | G   | intron | -0.1725116 | 0.3697402 | -0.0811283 | 0.6359084 | -0.605106058 | 0.01599886  |
| CSMD1 | rs2688320  | 8 | 3766980 | C | T   | intron | -0.1725802 | 0.369716  | -0.081047  | 0.6363766 | -0.605953156 | 0.01592466  |
| CSMD1 | rs2554507  | 8 | 3768068 | A | G   | intron | -0.1633209 | 0.3973234 | -0.0742186 | 0.6658905 | -0.602395084 | 0.01711512  |
| CSMD1 | rs2975332  | 8 | 3770162 | C | G   | intron | -0.1335666 | 0.2118019 | -0.0362075 | 0.703254  | -0.329830913 | 0.01547129  |
| CSMD1 | rs2554702  | 8 | 3770471 | C | T   | intron | -0.1088847 | 0.2957109 | -0.0069522 | 0.9399318 | -0.283359095 | 0.03201725  |
| CSMD1 | rs17328881 | 8 | 3770866 | A | G   | intron | -0.1937438 | 0.2646529 | -0.1595826 | 0.3083429 | -0.608200207 | 0.0008378   |
| CSMD1 | rs2948652  | 8 | 3770943 | C | G   | intron | -0.147875  | 0.2032393 | -0.0645575 | 0.5324497 | -0.238776658 | 0.02513345  |
| CSMD1 | rs2912288  | 8 | 3771236 | A | G   | intron | -0.1287435 | 0.2756194 | -0.0390003 | 0.7098119 | -0.306524003 | 0.0390825   |
| CSMD1 | rs2930370  | 8 | 3771353 | A | G   | intron | -0.1285801 | 0.2779514 | -0.038918  | 0.7115036 | -0.307357372 | 0.03936348  |
| CSMD1 | rs17067967 | 8 | 3772322 | G | T   | intron | -0.1182387 | 0.4670971 | -0.0825644 | 0.572478  | -0.44286844  | 0.04183898  |
| CSMD1 | rs2554630  | 8 | 3776903 | C | T   | intron | 0.3519555  | 0.0943939 | 0.2397882  | 0.19164   | 0.506854567  | 0.04806173  |
| CSMD1 | rs2688298  | 8 | 3778132 | C | T   | intron | -0.1932421 | 0.3230849 | -0.1793703 | 0.3104875 | -0.665050118 | 0.01130117  |
| CSMD1 | rs2627395  | 8 | 3778852 | C | T   | intron | 0.1817561  | 0.2623752 | 0.0439776  | 0.760479  | 0.440569878  | 0.03217619  |
| CSMD1 | rs2948644  | 8 | 3788431 | G | T   | intron | 0.2214739  | 0.0379111 | 0.1454416  | 0.1282544 | 0.296786046  | 0.02625275  |
| CSMD1 | rs2930336  | 8 | 3788599 | A | C   | intron | 0.2067044  | 0.0471683 | 0.1313154  | 0.1579795 | 0.297163832  | 0.0224416   |
| CSMD1 | rs2954607  | 8 | 3788749 | A | G   | intron | 0.1994355  | 0.0538598 | 0.1243323  | 0.178203  | 0.295915952  | 0.02190485  |
| CSMD1 | rs2554660  | 8 | 3789272 | C | T   | intron | 0.198847   | 0.0534829 | 0.1240303  | 0.1770422 | 0.294564329  | 0.02179023  |
| CSMD1 | rs2688270  | 8 | 3789287 | C | T   | intron | 0.1900041  | 0.0626483 | 0.122271   | 0.1789576 | 0.279076694  | 0.02820181  |
| CSMD1 | rs2554659  | 8 | 3789547 | C | T   | intron | 0.1979578  | 0.0534172 | 0.1239045  | 0.175255  | 0.293200805  | 0.0217162   |
| CSMD1 | rs2954605  | 8 | 3790398 | A | G   | intron | 0.1966461  | 0.0467692 | 0.1267086  | 0.1527479 | 0.285699603  | 0.02257118  |
| CSMD1 | rs2688267  | 8 | 3791265 | C | G   | intron | 0.1938096  | 0.0463235 | 0.134629   | 0.1208347 | 0.259649562  | 0.03153278  |
| CSMD1 | rs2975401  | 8 | 3792481 | C | T   | intron | -0.3680977 | 0.0165012 | -0.2359655 | 0.0897905 | -0.510610749 | 0.01090772  |
| CSMD1 | rs1593488  | 8 | 3793261 | C | G   | intron | 0.2105656  | 0.0302487 | 0.1497945  | 0.0844433 | 0.284993742  | 0.01893579  |
| CSMD1 | rs2162263  | 8 | 3794761 | C | T   | intron | 0.2081346  | 0.0397575 | 0.1494467  | 0.0947626 | 0.201071933  | 0.10641069  |
| CSMD1 | rs2114244  | 8 | 3794891 | A | G   | intron | 0.2090531  | 0.0386521 | 0.1488474  | 0.0957721 | 0.202640641  | 0.10337587  |
| CSMD1 | rs17068071 | 8 | 3795203 | A | G   | intron | 0.2057631  | 0.041795  | 0.1464834  | 0.1011707 | 0.204845131  | 0.09937568  |
| CSMD1 | rs2554622  | 8 | 3795532 | G | T   | intron | 0.2173761  | 0.0245419 | 0.1474516  | 0.0875223 | 0.299289939  | 0.01319736  |
| CSMD1 | rs2554621  | 8 | 3795574 | A | C   | intron | 0.2211463  | 0.0221463 | 0.1490868  | 0.0841188 | 0.301979584  | 0.01242129  |
| CSMD1 | rs2627531  | 8 | 3795620 | O | A/C | intron | 0.2211974  | 0.0221476 | 0.1490733  | 0.0841498 | 0.301985094  | 0.01241958  |
| CSMD1 | rs2688307  | 8 | 3795910 | A | C   | intron | 0.2156864  | 0.0258318 | 0.1545143  | 0.0372978 | 0.292578645  | 0.015440085 |
| CSMD1 | rs2688305  | 8 | 3796650 | A | G   | intron | 0.2262808  | 0.0199648 | 0.1793015  | 0.0393711 | 0.2902124768 | 0.01656023  |
| CSMD1 | rs1426280  | 8 | 3797729 | A | C   | intron | 0.2352781  | 0.016659  | 0.1874969  | 0.0329346 | 0.294784261  | 0.0160656   |
| CSMD1 | rs2627525  | 8 | 3797879 | C | T   | intron | -0.3668104 | 0.0282688 | -0.2529171 | 0.0960159 | -0.393105467 | 0.06069174  |
| CSMD1 | rs2259076  | 8 | 3799195 | C | T   | intron | 0.2346961  | 0.0173774 | 0.1869761  | 0.0341835 | 0.294045002  | 0.01682944  |
| CSMD1 | rs2258265  | 8 | 3799327 | C | T   | intron | -0.3867561 | 0.014663  | -0.2636207 | 0.0677797 | -0.478196229 | 0.01765151  |
| CSMD1 | rs1464617  | 8 | 3799582 | C | T   | intron | 0.2004797  | 0.0399293 | 0.1622805  | 0.0600705 | 0.239206854  | 0.04932507  |
| CSMD1 | rs2407189  | 8 | 3800808 | C | G   | intron | 0.2461437  | 0.019023  | 0.2118617  | 0.0230397 | 0.275310567  | 0.03185182  |
| CSMD1 | rs2627468  | 8 | 3825199 | C | T   | intron | -0.1304603 | 0.2785204 | -0.0521931 | 0.6240679 | -0.297274923 | 0.04891932  |
| CSMD1 | rs2954644  | 8 | 3826459 | G | T   | intron | -0.5570046 | 0.0850536 | -0.2007483 | 0.4924344 | -1.12122533  | 0.01711448  |
| CSMD1 | rs940155   | 8 | 3848750 | C | T   | intron | 0.1439178  | 0.1753774 | 0.0168064  | 0.8574974 | 0.286605625  | 0.0295693   |
| CSMD1 | rs17068473 | 8 | 3854987 | G | T   | intron | 0.1636596  | 0.1368637 | 0.0555473  | 0.5664006 | 0.289055927  | 0.03664214  |
| CSMD1 | rs3860859  | 8 | 3899910 | A | T   | intron | 0.3112016  | 0.0040888 | 0.1859254  | 0.056512  | 0.446359018  | 0.00166088  |
| CSMD1 | rs3990497  | 8 | 3900189 | C | T   | intron | 0.3112016  | 0.0040888 | 0.1859254  | 0.056512  | 0.446359018  | 0.00166088  |
| CSMD1 | rs7016290  | 8 | 3900276 | C | G   | intron | 0.3112016  | 0.0040888 | 0.1859254  | 0.056512  | 0.446359018  | 0.00166088  |
| CSMD1 | rs2897595  | 8 | 3900305 | C | T   | intron | 0.3113436  | 0.0040793 | 0.186041   | 0.056402  | 0.446716061  | 0.00165068  |
| CSMD1 | rs7003625  | 8 | 3900812 | A | G   | intron | 0.3019569  | 0.0057926 | 0.1748479  | 0.075614  | 0.436106222  | 0.00234882  |
| CSMD1 | rs2740909  | 8 | 3901193 | A | G   | intron | 0.3576922  | 0.0171946 | 0.1995577  | 0.1295772 | 0.474994038  | 0.00922369  |
| CSMD1 | rs2554560  | 8 | 3901223 | C | G   | intron | 0.3477298  | 0.0205564 | 0.2031979  | 0.1227119 | 0.452215386  | 0.0134211   |
| CSMD1 | rs7834045  | 8 | 3901269 | A | G   | intron | 0.3259903  | 0.0042294 | 0.2043539  | 0.046215  | 0.464709589  | 0.00174596  |
| CSMD1 | rs9773977  | 8 | 3902295 | C | G   | intron | 0.2438561  | 0.0140237 | 0.1596736  | 0.0703633 | 0.320939951  | 0.01039885  |
| CSMD1 | rs2740903  | 8 | 3902387 | A | G   | intron | 0.357069   | 0.0173783 | 0.2004355  | 0.127859  | 0.474748974  | 0.00923612  |
| CSMD1 | rs9772485  | 8 | 3902502 | A | T   | intron | 0.356591   | 0.0012444 | 0.2276411  | 0.0223104 | 0.535559695  | 0.0025911   |
| CSMD1 | rs2740902  | 8 | 3902552 | A | C   | intron | 0.2885999  | 0.0122723 | 0.2117296  | 0.0376506 | 0.320930104  | 0.02568419  |
| CSMD1 | rs4629888  | 8 | 3902583 | C | T   | intron | -0.6054335 | 0.0026727 | -0.449026  | 0.0157969 | -0.722529167 | 0.00664806  |
| CSMD1 | rs4416840  | 8 | 3902702 | C | G   | intron | 0.3437728  | 0.0027971 | 0.2245131  | 0.030735  | 0.533220023  | 0.00054777  |
| CSMD1 | rs4421367  | 8 | 3902849 | A | C   | intron | 0.3437425  | 0.002803  | 0.2244896  | 0.0307827 | 0.533283085  | 0.00054824  |
| CSMD1 | rs4642668  | 8 | 3902910 | G | T   | intron | 0.3437282  | 0.002805  | 0.2245198  | 0.0307714 | 0.533313075  | 0.00054841  |
| CSMD1 | rs2554557  | 8 | 3903171 | C | T   | intron | 0.3732404  | 0.0098278 | 0.2250818  | 0.0752541 | 0.498239815  | 0.00490176  |
| CSMD1 | rs7813093  | 8 | 3903546 | A | C   | intron | 0.1703175  | 0.1218459 | 0.0869208  | 0.3794205 | 0.291646897  | 0.03984166  |
| CSMD1 | rs17331272 | 8 | 3903579 | A | G   | intron | 0.3595401  | 0.1176044 | 0.2207986  | 0.1114569 | 0.489135562  | 0.01975889  |
| CSMD1 | rs4875264  | 8 | 3903796 | G | T   | intron | 0.4444277  | 0.010556  | 0.2315134  | 0.1451883 | 0.552874548  | 0.0237478   |
| CSMD1 | rs3906471  | 8 | 3904034 | G | T   | intron | 0.1691473  | 0.1186485 | 0.0890777  | 0.3613157 | 0.289365756  | 0.03798859  |
| CSMD1 | rs3860860  | 8 | 3904248 | A | T   | intron | 0.3901719  | 0.0128534 | 0.1983243  | 0.1674066 | 0.499010963  | 0.02429287  |
| CSMD1 | rs3849819  | 8 | 3904302 | A | T   | intron | 0.1692459  | 0.1183228 | 0.0898922  | 0.3568076 | 0.288941001  | 0.03809601  |
| CSMD1 | rs3843921  | 8 | 3904671 | G | T   | intron | 0.1615942  | 0.1374115 | 0.0828608  | 0.3969702 | 0.276259114  | 0.04750502  |
| CSMD1 | rs2554556  | 8 | 3904730 | C | G   | intron | 0.3479519  | 0.0137639 | 0.21073    | 0.0885532 | 0.473845069  | 0.00606257  |
| CSMD1 | rs7004524  | 8 | 3904874 | A | G   | intron | 0.3722473  | 0.0105305 | 0.2252292  | 0.0916025 | 0.527472125  | 0.00968949  |
| CSMD1 | rs2554553  | 8 | 3905917 | G | T   | intron | 0.3382436  | 0.0169477 | 0.1926352  | 0.1205983 | 0.475282666  | 0.00605847  |
| CSMD1 | rs2554552  | 8 | 3906319 | A | G   | intron | 0.3372629  | 0.0172964 | 0.1910047  | 0.1238826 | 0.476731054  | 0.00591086  |
| CSMD1 | rs2740894  | 8 | 3906718 | G | T   | intron | 0.3269338  | 0.0211262 | 0.190917   | 0.1243846 | 0.456816123  | 0.00867952  |
| CSMD1 | rs2554548  | 8 | 3907141 | C | G   | intron | 0.3342104  | 0.0183148 | 0.1866248  | 0.132701  | 0.479028948  | 0.00566796  |
| CSMD1 | rs2740893  | 8 | 3907180 | C | T   | intron | 0.333938   | 0.0184025 | 0.1862475  | 0.1334609 | 0.479307632  | 0.00563758  |
| CSMD1 | rs2740892  | 8 | 3907367 | C | T   | intron | 0.3335454  | 0.0185212 | 0.1857518  | 0.1344428 | 0.479848791  | 0.0055774   |
| CSMD1 | rs2740891  | 8 | 3908147 | A | G   | intron | 0.3325119  | 0.0188482 | 0.1844012  | 0.137149  | 0.48049688   | 0.00550417  |
| CSMD1 | rs2554547  | 8 | 3908317 | A | G   | intron | 0.3316394  | 0.0191139 | 0.1832779  | 0.1393994 | 0.48132605   | 0.00540777  |
| CSMD1 | rs2554546  | 8 | 3909057 | C | G   | intron | 0.3316792  | 0.0190665 | 0.1837008  | 0.1383664 | 0.481759059  | 0.00535554  |
| CSMD1 | rs2554545  | 8 | 3909072 | C | T   | intron | 0.331769   | 0.0190084 | 0.1841492  | 0.1373096 | 0.481974548  | 0.00532978  |
| CSMD1 | rs2740889  | 8 | 3909838 | G | T   | intron | 0.3344157  | 0.0179935 | 0.1896075  | 0.1257175 | 0.482183568  | 0.00530408  |
| CSMD1 | rs2554541  | 8 | 3910096 | A | G   | intron | 0.3346672  | 0.0178192 | 0.1908153  | 0.1230179 | 0.482519979  | 0.00526186  |
| CSMD1 | rs2554540  | 8 | 3910428 | A | G   | intron | 0.3491816  | 0.0132209 | 0.2135409  | 0.0834457 | 0.484051987  | 0.00505261  |
| CSMD1 | rs2554539  | 8 | 3910545 | A | C   | intron | 0.3500189  | 0.0126807 | 0.2188071  | 0.075045  | 0.485537887  | 0.00478849  |
| CSMD1 | rs2912275  | 8 | 3910836 | A | G   | intron | 0.3500316  | 0.0126764 | 0.2188045  | 0.0750451 | 0.485544326  | 0.00478757  |
| CSMD1 | rs2554537  | 8 | 3910850 | C | G   | intron | 0.3500428  | 0.0126733 | 0.2188113  | 0.0750351 | 0.485552469  | 0.00478667  |
| CSMD1 | rs2554536  | 8 | 3910891 | C | T   | intron | 0.3500605  |           |            |           |              |             |

Sheet1

|       |            |   |         |   |     |        |            |           |            |           |              |            |
|-------|------------|---|---------|---|-----|--------|------------|-----------|------------|-----------|--------------|------------|
| CSMD1 | rs2554532  | 8 | 3911941 | G | T   | intron | 0.3544196  | 0.0123699 | 0.2196109  | 0.0766072 | 0.492617779  | 0.00450816 |
| CSMD1 | rs2554531  | 8 | 3912305 | C | G   | intron | 0.3553378  | 0.0126417 | 0.2193222  | 0.0785472 | 0.495425761  | 0.00456163 |
| CSMD1 | rs2554530  | 8 | 3912408 | C | G   | intron | 0.3559636  | 0.0125973 | 0.2195866  | 0.0785775 | 0.496255777  | 0.00454004 |
| CSMD1 | rs2740881  | 8 | 3912457 | C | T   | intron | 0.357977   | 0.0124612 | 0.2195804  | 0.0798135 | 0.499902428  | 0.00437645 |
| CSMD1 | rs2552155  | 8 | 3912587 | A | G   | intron | 0.3851492  | 0.0106245 | 0.2410611  | 0.0674593 | 0.490375084  | 0.0079644  |
| CSMD1 | rs2554529  | 8 | 3912606 | A | G   | intron | 0.2849556  | 0.0133113 | 0.1990739  | 0.0504942 | 0.330472407  | 0.02109865 |
| CSMD1 | rs7001863  | 8 | 3912898 | A | G   | intron | 0.3946205  | 0.0111359 | 0.2143442  | 0.1327531 | 0.481414859  | 0.02865738 |
| CSMD1 | rs17068827 | 8 | 3919870 | C | G   | intron | 0.343463   | 0.0238306 | 0.1774468  | 0.2004604 | 0.396015951  | 0.0625109  |
| CSMD1 | rs1365273  | 8 | 3922801 | G | T   | intron | -0.4903249 | 0.0679885 | -0.4328679 | 0.090228  | -0.952377417 | 0.01515274 |
| CSMD1 | rs2552122  | 8 | 3928521 | A | C   | intron | 0.2197112  | 0.0257396 | 0.2667921  | 0.0021965 | 0.225510208  | 0.0636133  |
| CSMD1 | rs1863478  | 8 | 3931495 | C | G   | intron | 0.2478384  | 0.0454661 | 0.2650432  | 0.0148375 | 0.264480949  | 0.08687827 |
| CSMD1 | rs1541718  | 8 | 3937191 | C | T   | intron | 0.1781258  | 0.0582638 | 0.1911581  | 0.0216035 | 0.17762292   | 0.12265741 |
| CSMD1 | rs2552143  | 8 | 3937798 | A | G   | intron | 0.2678844  | 0.0584156 | 0.2601079  | 0.0358514 | 0.315033588  | 0.07306704 |
| CSMD1 | rs2552144  | 8 | 3937827 | C | G   | intron | 0.1817063  | 0.0548838 | 0.1940982  | 0.0204792 | 0.184077223  | 0.11214775 |
| CSMD1 | rs2554636  | 8 | 3937864 | C | T   | intron | 0.1822054  | 0.1132427 | 0.2165565  | 0.0325542 | 0.177771622  | 0.11214936 |
| CSMD1 | rs2161929  | 8 | 3938349 | A | G   | intron | 0.1803819  | 0.1168891 | 0.2149269  | 0.0338876 | 0.175827919  | 0.22275653 |
| CSMD1 | rs2552145  | 8 | 3938481 | C | T   | intron | 0.1546852  | 0.0999824 | 0.1844545  | 0.0269864 | 0.116779803  | 0.31544687 |
| CSMD1 | rs2740897  | 8 | 3938980 | C | G   | intron | 0.1793342  | 0.1190109 | 0.2140814  | 0.0345904 | 0.174532882  | 0.22613499 |
| CSMD1 | rs2554639  | 8 | 3939181 | C | T   | intron | 0.1537608  | 0.1020903 | 0.1838118  | 0.0275588 | 0.11560354   | 0.32055344 |
| CSMD1 | rs2554640  | 8 | 3939228 | A | G   | intron | 0.1789314  | 0.1198424 | 0.2138132  | 0.032482  | 0.174005263  | 0.22756445 |
| CSMD1 | rs2554642  | 8 | 3939817 | C | T   | intron | 0.3012817  | 0.0176859 | 0.3165898  | 0.006621  | 0.243495981  | 0.13585277 |
| CSMD1 | rs2554644  | 8 | 3942072 | G | T   | intron | 0.1806648  | 0.1155689 | 0.2200315  | 0.0294866 | 0.176305286  | 0.22108186 |
| CSMD1 | rs2554645  | 8 | 3942311 | C | G   | intron | 0.3545605  | 0.0074181 | 0.3915725  | 0.0014289 | 0.280590164  | 0.10259093 |
| CSMD1 | rs2554646  | 8 | 3942747 | C | T   | intron | 0.1501201  | 0.1148291 | 0.2080534  | 0.0137386 | 0.193560307  | 0.10522038 |
| CSMD1 | rs9644362  | 8 | 3943127 | C | G   | intron | 0.3558785  | 0.007221  | 0.3928829  | 0.0013882 | 0.282144994  | 0.09875596 |
| CSMD1 | rs2912284  | 8 | 3950008 | C | T   | intron | 0.1864117  | 0.0983931 | 0.2359012  | 0.0176407 | 0.217854251  | 0.2213614  |
| CSMD1 | rs9644282  | 8 | 3944366 | A | T   | intron | 0.3100422  | 0.0147349 | 0.3268348  | 0.0052401 | 0.255433606  | 0.12015802 |
| CSMD1 | rs17068875 | 8 | 3945333 | A | G   | intron | 0.1743661  | 0.1274433 | 0.214661   | 0.0370725 | 0.168786883  | 0.23964756 |
| CSMD1 | rs17068887 | 8 | 3946649 | C | T   | intron | 0.2287334  | 0.0607063 | 0.2410516  | 0.0244407 | 0.235980133  | 0.12034616 |
| CSMD1 | rs17068893 | 8 | 3947046 | A | G   | intron | 0.3134476  | 0.0137743 | 0.3299516  | 0.0049021 | 0.259049038  | 0.11615287 |
| CSMD1 | rs10095133 | 8 | 3947058 | C | T   | intron | 0.1724231  | 0.1311418 | 0.2129034  | 0.0342486 | 0.16677107   | 0.24450058 |
| CSMD1 | rs7009032  | 8 | 3948018 | C | G   | intron | 0.1820302  | 0.1052302 | 0.2315322  | 0.0193715 | 0.168953522  | 0.23061725 |
| CSMD1 | rs17068917 | 8 | 3949981 | C | T   | intron | -0.3017147 | 0.0431642 | -0.3041946 | 0.0250517 | -0.224078898 | 0.24122116 |
| CSMD1 | rs7815908  | 8 | 3950008 | A | G   | intron | 0.2096121  | 0.0833065 | 0.2205316  | 0.0382709 | 0.217985065  | 0.14837041 |
| CSMD1 | rs7819946  | 8 | 3950194 | C | T   | intron | 0.2266142  | 0.0628342 | 0.2358639  | 0.027394  | 0.235919343  | 0.11981154 |
| CSMD1 | rs13340602 | 8 | 3950898 | C | G   | intron | 0.2542807  | 0.0394811 | 0.2566586  | 0.0178461 | 0.273335033  | 0.07486916 |
| CSMD1 | rs7008378  | 8 | 3951083 | A | C   | intron | 0.1171902  | 0.235163  | 0.2053337  | 0.0192483 | 0.157118948  | 0.20453489 |
| CSMD1 | rs918915   | 8 | 3951857 | C | G   | intron | 0.1516052  | 0.1184985 | 0.1858674  | 0.0306262 | 0.216189463  | 0.07703004 |
| CSMD1 | rs13340565 | 8 | 3952388 | A | G   | intron | 0.2210896  | 0.066101  | 0.2295444  | 0.029786  | 0.242795879  | 0.10429619 |
| CSMD1 | rs13340606 | 8 | 3952623 | A | C   | intron | 0.2151048  | 0.0725658 | 0.2228176  | 0.03413   | 0.238346819  | 0.10950245 |
| CSMD1 | rs10107190 | 8 | 3952646 | C | G   | intron | 0.2149934  | 0.0728125 | 0.2197676  | 0.0367493 | 0.23829753   | 0.10958056 |
| CSMD1 | rs13340613 | 8 | 3952784 | C | T   | intron | 0.2164406  | 0.0710745 | 0.2209522  | 0.035844  | 0.239850316  | 0.1075577  |
| CSMD1 | rs13340578 | 8 | 3952966 | C | T   | intron | 0.2178707  | 0.0692393 | 0.2220652  | 0.0349244 | 0.241451791  | 0.10524093 |
| CSMD1 | rs17068940 | 8 | 3953046 | C | T   | intron | 0.0693325  | 0.2178339 | 0.2219984  | 0.0350103 | 0.241504084  | 0.10522801 |
| CSMD1 | rs17068944 | 8 | 3953282 | C | G   | intron | 0.2175504  | 0.069811  | 0.2217895  | 0.0352662 | 0.241153926  | 0.10591429 |
| CSMD1 | rs17068949 | 8 | 3953954 | A | G   | intron | 0.2171105  | 0.0706006 | 0.2214247  | 0.0357281 | 0.240694365  | 0.10692466 |
| CSMD1 | rs7839158  | 8 | 3954057 | C | T   | intron | 0.2170346  | 0.0707883 | 0.2213019  | 0.0358891 | 0.240803049  | 0.10688342 |
| CSMD1 | rs7816895  | 8 | 3954216 | A | G   | intron | 0.2169999  | 0.0708912 | 0.2212117  | 0.0360045 | 0.240944866  | 0.10674268 |
| CSMD1 | rs17068953 | 8 | 3954681 | A | G   | intron | 0.2162832  | 0.0721472 | 0.2205291  | 0.0368077 | 0.240329119  | 0.10809449 |
| CSMD1 | rs17068954 | 8 | 3954773 | A | G   | intron | 0.2162751  | 0.0722199 | 0.2205013  | 0.0368744 | 0.240391771  | 0.10809054 |
| CSMD1 | rs6990225  | 8 | 3954821 | A | C   | intron | 0.2161679  | 0.0724441 | 0.2203287  | 0.0370783 | 0.240456394  | 0.10810652 |
| CSMD1 | rs918917   | 8 | 3955025 | A | G   | intron | 0.2161883  | 0.072485  | 0.2202516  | 0.0371886 | 0.240710969  | 0.10780661 |
| CSMD1 | rs918918   | 8 | 3955092 | A | G/T | intron | 0.2161891  | 0.0725432 | 0.2201953  | 0.0372766 | 0.240894147  | 0.10761436 |
| CSMD1 | rs17068975 | 8 | 3957182 | C | G   | intron | 0.2334445  | 0.0563842 | 0.2210547  | 0.0394082 | 0.272536488  | 0.07340467 |
| CSMD1 | rs7011876  | 8 | 3958851 | C | G   | intron | -0.3150116 | 0.026266  | -0.2975683 | 0.0204829 | -0.263963228 | 0.15200061 |
| CSMD1 | rs17069006 | 8 | 3961402 | A | T   | intron | -0.2516064 | 0.06163   | -0.2398531 | 0.0480446 | -0.204960351 | 0.24053412 |
| CSMD1 | rs17404496 | 8 | 3961468 | A | T   | intron | 0.196589   | 0.1825931 | 0.2617271  | 0.0425606 | 0.196498157  | 0.25916329 |
| CSMD1 | rs17069009 | 8 | 3961881 | C | G   | intron | -0.2585549 | 0.0180257 | -0.2428435 | 0.0139129 | -0.216594276 | 0.2519639  |
| CSMD1 | rs7004070  | 8 | 3966060 | A | G   | intron | 0.2528033  | 0.0319676 | 0.229546   | 0.0268529 | 0.210042303  | 0.15049485 |
| CSMD1 | rs12164173 | 8 | 3973083 | G | T   | intron | -0.250566  | 0.0737043 | -0.2745298 | 0.0290143 | -0.186802875 | 0.29957658 |
| CSMD1 | rs10088637 | 8 | 3980158 | A | G   | intron | -0.2109958 | 0.0373292 | -0.16167   | 0.0730826 | -0.154519501 | 0.21832949 |
| CSMD1 | rs17404676 | 8 | 3980613 | C | T   | intron | 0.2548785  | 0.1143412 | 0.3124768  | 0.0263699 | 0.293684084  | 0.11940503 |
| CSMD1 | rs9314517  | 8 | 3980642 | C | T   | intron | -0.2969065 | 0.0204698 | -0.3292101 | 0.0044379 | -0.264210531 | 0.1127132  |
| CSMD1 | rs3891533  | 8 | 3980781 | C | T   | intron | -0.2969341 | 0.0204888 | -0.329166  | 0.0044535 | -0.264268168 | 0.11274    |
| CSMD1 | rs10108082 | 8 | 3981264 | A | G   | intron | -0.29674   | 0.0206587 | -0.3289283 | 0.0045109 | -0.2638834   | 0.11354894 |
| CSMD1 | rs9314518  | 8 | 3982506 | G | T   | intron | -0.3088703 | 0.0206277 | -0.3139951 | 0.0091383 | -0.325066008 | 0.06680257 |
| CSMD1 | rs17332797 | 8 | 3984068 | A | C   | intron | 0.2395787  | 0.1384363 | 0.3066712  | 0.029689  | 0.275478881  | 0.14522674 |
| CSMD1 | rs7011371  | 8 | 3985130 | A | G   | intron | 0.1601679  | 0.2079456 | 0.2269999  | 0.0426273 | 0.103187989  | 0.50511586 |
| CSMD1 | rs17069085 | 8 | 3987816 | C | T   | intron | 0.2093716  | 0.092461  | 0.2689385  | 0.014118  | 0.188677661  | 0.20982196 |
| CSMD1 | rs11774739 | 8 | 3987971 | C | T   | intron | 0.1725656  | 0.1785258 | 0.2332185  | 0.0390238 | 0.12986398   | 0.40613472 |
| CSMD1 | rs17069103 | 8 | 3988689 | A | G   | intron | 0.2108425  | 0.0961776 | 0.256253   | 0.0214459 | 0.188455355  | 0.21673423 |
| CSMD1 | rs12155841 | 8 | 3989696 | A | C   | intron | 0.1194201  | 0.4864751 | 0.3087475  | 0.040138  | 0.193386408  | 0.35781407 |
| CSMD1 | rs17405426 | 8 | 4040963 | A | G   | intron | -0.2783526 | 0.0636289 | -0.2379247 | 0.0796532 | -0.409790377 | 0.0333082  |
| CSMD1 | rs17405766 | 8 | 4052994 | C | G   | intron | 0.025956   | 0.8963828 | 0.3600205  | 0.0365904 | -0.124908018 | 0.6268278  |
| CSMD1 | rs7840813  | 8 | 4054720 | A | T   | intron | 0.023875   | 0.9047076 | 0.3558281  | 0.0389832 | -0.125863023 | 0.62458513 |
| CSMD1 | rs7837656  | 8 | 4055063 | A | G   | intron | 0.0311517  | 0.8749202 | 0.3435795  | 0.0446942 | -0.142002925 | 0.57859923 |
| CSMD1 | rs7841311  | 8 | 4055073 | C | T   | intron | 0.0310193  | 0.8754352 | 0.3431918  | 0.0449155 | -0.142208106 | 0.5780519  |
| CSMD1 | rs17069425 | 8 | 4060141 | A | G   | intron | 0.0568934  | 0.7785021 | 0.3629762  | 0.0378254 | -0.109212114 | 0.67733224 |
| CSMD1 | rs11779968 | 8 | 4062601 | A | C   | intron | 0.0472447  | 0.8147987 | 0.3525543  | 0.0432858 | -0.120211043 | 0.64693247 |
| CSMD1 | rs10503240 | 8 | 4062819 | A | C   | intron | 0.0660061  | 0.7444894 | 0.3678579  | 0.0354929 | -0.097573759 | 0.71069895 |
| CSMD1 | rs11776490 | 8 | 4062910 | C | T   | intron | 0.0668431  | 0.7413036 | 0.3670291  | 0.0358601 | -0.094523011 | 0.71929643 |
| CSMD1 | rs11780805 | 8 | 4063099 | A | T   | intron | 0.0499407  | 0.8043252 | 0.3525339  | 0.0431764 | -0.113809054 | 0.66446428 |
| CSMD1 | rs11994662 | 8 | 4130911 | C | T   | intron | 0.5810746  | 0.0453712 | 0.4039216  | 0.1060122 | 0.678817327  | 0.05796457 |
| CSMD1 | rs11787185 | 8 | 4145796 |   |     |        |            |           |            |           |              |            |

Sheet1

|       |            |   |         |   |     |        |            |           |            |           |              |            |
|-------|------------|---|---------|---|-----|--------|------------|-----------|------------|-----------|--------------|------------|
| CSMD1 | rs10108386 | 8 | 4161522 | A | G   | intron | -0.2930553 | 0.0275664 | -0.2727329 | 0.0242164 | -0.232896043 | 0.1694779  |
| CSMD1 | rs10112948 | 8 | 4162450 | C | G   | intron | -0.2688191 | 0.0477188 | -0.2683712 | 0.0297044 | -0.226884624 | 0.1933675  |
| CSMD1 | rs4875319  | 8 | 4162862 | A | G   | intron | -0.3016112 | 0.0230581 | -0.2803381 | 0.0203552 | -0.247468901 | 0.14404772 |
| CSMD1 | rs4875320  | 8 | 4164013 | A | T   | intron | -0.2639277 | 0.0525384 | -0.2653043 | 0.032019  | -0.223604719 | 0.20084087 |
| CSMD1 | rs9314522  | 8 | 4165205 | C | G   | intron | -0.2954925 | 0.0188846 | -0.3019137 | 0.0081222 | -0.198930979 | 0.21166415 |
| CSMD1 | rs17335309 | 8 | 4165497 | A | T   | intron | -0.4575592 | 0.0356193 | -0.4926081 | 0.0142921 | -0.400137257 | 0.1534579  |
| CSMD1 | rs11783438 | 8 | 4166030 | A | T   | intron | -0.2734955 | 0.0602123 | -0.2334349 | 0.0092429 | -0.250418302 | 0.04505798 |
| CSMD1 | rs10503249 | 8 | 4166426 | A | G   | intron | -0.2734451 | 0.0061169 | -0.2340894 | 0.0091919 | -0.249694966 | 0.0459789  |
| CSMD1 | rs10503250 | 8 | 4166522 | A | G   | intron | -0.272655  | 0.0062929 | -0.2369268 | 0.0084255 | -0.24694847  | 0.04825902 |
| CSMD1 | rs10503251 | 8 | 4166712 | C | T   | intron | -0.2761085 | 0.0056433 | -0.2399428 | 0.0076287 | -0.25132699  | 0.04464892 |
| CSMD1 | rs6984591  | 8 | 4166781 | A | C   | intron | -0.3627683 | 0.0008833 | -0.3051531 | 0.0020494 | -0.358752151 | 0.00990676 |
| CSMD1 | rs4875322  | 8 | 4167608 | G | T   | intron | -0.3635964 | 0.0008563 | -0.2963742 | 0.0027194 | -0.358523773 | 0.00991897 |
| CSMD1 | rs4875323  | 8 | 4167720 | C | T   | intron | -0.2729405 | 0.0062411 | -0.2359625 | 0.0086815 | -0.247108247 | 0.04818474 |
| CSMD1 | rs4875324  | 8 | 4167854 | C | T   | intron | -0.274819  | 0.0058158 | -0.2497824 | 0.0054811 | -0.246349642 | 0.0487599  |
| CSMD1 | rs7008640  | 8 | 4169488 | C | G   | intron | -0.3543369 | 0.0028749 | -0.3123161 | 0.0035908 | -0.361775765 | 0.01560129 |
| CSMD1 | rs10088254 | 8 | 4170786 | C | T   | intron | -0.2780806 | 0.016669  | -0.2600209 | 0.0132025 | -0.334715771 | 0.02342253 |
| CSMD1 | rs10088341 | 8 | 4170818 | C | T   | intron | -0.2926897 | 0.0078068 | -0.2483643 | 0.012374  | -0.321292124 | 0.02210911 |
| CSMD1 | rs10098267 | 8 | 4170933 | C | G   | intron | -0.2737917 | 0.017734  | -0.2544146 | 0.0146282 | -0.330043009 | 0.02462679 |
| CSMD1 | rs12541509 | 8 | 4171623 | A | T   | intron | -0.2971094 | 0.0105266 | -0.2752394 | 0.0088447 | -0.36739218  | 0.01329443 |
| CSMD1 | rs7002661  | 8 | 4171740 | A | G   | intron | -0.3050536 | 0.0087751 | -0.2822849 | 0.0074537 | -0.381736647 | 0.01209347 |
| CSMD1 | rs6983013  | 8 | 4171758 | C | T   | intron | -0.3057632 | 0.0086816 | -0.2830856 | 0.0073508 | -0.382365274 | 0.0103669  |
| CSMD1 | rs7002670  | 8 | 4171765 | A | T   | intron | -0.3519214 | 0.0038814 | -0.326248  | 0.0032336 | -0.441464316 | 0.00483681 |
| CSMD1 | rs6558860  | 8 | 4172109 | C | T   | intron | -0.2804504 | 0.0167674 | -0.2787227 | 0.0087804 | -0.37203453  | 0.01336561 |
| CSMD1 | rs10112765 | 8 | 4172625 | A | G   | intron | -0.3179409 | 0.0070413 | -0.2967509 | 0.0056582 | -0.404550776 | 0.007635   |
| CSMD1 | rs11784405 | 8 | 4173207 | A | G   | intron | -0.2273257 | 0.0263597 | -0.2105738 | 0.0218506 | -0.307760497 | 0.02058033 |
| CSMD1 | rs10089612 | 8 | 4173651 | C | T   | intron | -0.3311899 | 0.0054817 | -0.3093638 | 0.004321  | -0.400663367 | 0.00857078 |
| CSMD1 | rs12679077 | 8 | 4173675 | C | T   | intron | -0.2299449 | 0.0248144 | -0.2138195 | 0.0200464 | -0.311612517 | 0.01926237 |
| CSMD1 | rs4875329  | 8 | 4174454 | A | C   | intron | -0.1738425 | 0.0895882 | -0.179338  | 0.0843749 | -0.183371617 | 0.15971291 |
| CSMD1 | rs17335476 | 8 | 4174633 | C | G   | intron | -0.2849212 | 0.0171545 | -0.2798674 | 0.0096142 | -0.353263267 | 0.01908887 |
| CSMD1 | rs10091666 | 8 | 4177231 | A | T   | intron | -0.3558903 | 0.0052914 | -0.323781  | 0.0055884 | -0.478003398 | 0.00488586 |
| CSMD1 | rs11136729 | 8 | 4177791 | A | G   | intron | -0.3798062 | 0.005779  | -0.2908961 | 0.0194598 | -0.510275008 | 0.0045581  |
| CSMD1 | rs10096058 | 8 | 4178508 | A | T   | intron | -0.3193652 | 0.0098743 | -0.2367569 | 0.033614  | -0.392739025 | 0.01321231 |
| CSMD1 | rs13264536 | 8 | 4178539 | C | G   | intron | 0.1909636  | 0.1460552 | 0.1195436  | 0.3029127 | 0.387337971  | 0.02067499 |
| CSMD1 | rs10108628 | 8 | 4178604 | G | T   | intron | -0.3192839 | 0.0099703 | -0.2359034 | 0.0344598 | -0.391064533 | 0.01365851 |
| CSMD1 | rs10108772 | 8 | 4178791 | A | G   | intron | -0.3229998 | 0.0058299 | -0.2496936 | 0.0178811 | -0.458513441 | 0.00253488 |
| CSMD1 | rs2407887  | 8 | 4179584 | C | G   | intron | 0.1682564  | 0.1893101 | 0.1054028  | 0.3520138 | 0.382661148  | 0.01974717 |
| CSMD1 | rs10112705 | 8 | 4179805 | A | G   | intron | 0.1677157  | 0.1906841 | 0.1044325  | 0.3564067 | 0.380399285  | 0.0204339  |
| CSMD1 | rs2134951  | 8 | 4180726 | A | C   | intron | 0.1660257  | 0.1956846 | 0.1014068  | 0.3710984 | 0.376186248  | 0.0218942  |
| CSMD1 | rs10503253 | 8 | 4180844 | A | C   | intron | -0.3294787 | 0.0056309 | -0.2463703 | 0.0213611 | -0.480168319 | 0.00190111 |
| CSMD1 | rs1566860  | 8 | 4181781 | A | G   | intron | 0.1822526  | 0.1635559 | 0.1034815  | 0.3705871 | 0.365820796  | 0.02796468 |
| CSMD1 | rs13269120 | 8 | 4182519 | C | G   | intron | -0.3386998 | 0.0037491 | -0.2513922 | 0.0169505 | -0.480015488 | 0.00161817 |
| CSMD1 | rs2036549  | 8 | 4182632 | A | G   | intron | 0.182854   | 0.1629454 | 0.1032113  | 0.3727825 | 0.372326356  | 0.02567026 |
| CSMD1 | rs12541979 | 8 | 4183528 | A | C   | intron | 0.1715946  | 0.1878435 | 0.0926213  | 0.4216051 | 0.372796208  | 0.02523759 |
| CSMD1 | rs9314525  | 8 | 4183960 | A | T   | intron | -0.3335275 | 0.004552  | -0.2437043 | 0.0212562 | -0.477537724 | 0.00182631 |
| CSMD1 | rs1847570  | 8 | 4185750 | C | T   | intron | -0.200823  | 0.0352567 | -0.1582042 | 0.0623645 | -0.323726429 | 0.00796135 |
| CSMD1 | rs10086105 | 8 | 4188180 | C | T   | intron | -0.2057572 | 0.0348681 | -0.1561959 | 0.0719992 | -0.323534241 | 0.01002465 |
| CSMD1 | rs10866968 | 8 | 4188511 | C | T   | intron | -0.2157744 | 0.0299189 | -0.1580593 | 0.0731884 | -0.330157125 | 0.0085939  |
| CSMD1 | rs10104209 | 8 | 4189745 | C | G   | intron | -0.1992673 | 0.0357531 | -0.148216  | 0.078841  | -0.318823382 | 0.00829862 |
| CSMD1 | rs10103601 | 8 | 4189947 | C | G   | intron | -0.2314641 | 0.0243888 | -0.175005  | 0.055656  | -0.343087267 | 0.00891721 |
| CSMD1 | rs10091031 | 8 | 4190180 | A | G   | intron | -0.200085  | 0.0350062 | -0.1490583 | 0.0771815 | -0.318487088 | 0.00835691 |
| CSMD1 | rs10103969 | 8 | 4190206 | A | G   | intron | -0.2012496 | 0.0339237 | -0.1499594 | 0.0753653 | -0.31849471  | 0.0083412  |
| CSMD1 | rs10091134 | 8 | 4190222 | A | G   | intron | -0.2016925 | 0.0381167 | -0.1595659 | 0.064798  | -0.324454848 | 0.00894718 |
| CSMD1 | rs10094349 | 8 | 4190312 | C | T   | intron | -0.1997457 | 0.0348187 | -0.1527229 | 0.0693922 | -0.304370794 | 0.01116314 |
| CSMD1 | rs10105113 | 8 | 4190489 | C | T   | intron | -0.2213892 | 0.0293077 | -0.1666541 | 0.0661057 | -0.325185494 | 0.01154361 |
| CSMD1 | rs13276771 | 8 | 4190638 | C | T   | intron | -0.5863197 | 0.02604   | -0.5314686 | 0.0328257 | -0.887859732 | 0.01728091 |
| CSMD1 | rs13268424 | 8 | 4190753 | C | T   | intron | -0.2217156 | 0.0290646 | -0.1666304 | 0.066142  | -0.32574599  | 0.01139784 |
| CSMD1 | rs10108270 | 8 | 4190793 | A | C   | intron | -0.2392949 | 0.0218589 | -0.1977746 | 0.0349246 | -0.358491097 | 0.00801387 |
| CSMD1 | rs10107472 | 8 | 4190874 | A | G   | intron | -0.2394875 | 0.0217611 | -0.1978035 | 0.0349061 | -0.358957408 | 0.00793466 |
| CSMD1 | rs10108725 | 8 | 4191202 | C | T   | intron | -0.2932628 | 0.012311  | -0.2261389 | 0.0314069 | -0.407916934 | 0.00693763 |
| CSMD1 | rs4875336  | 8 | 4192528 | C | G   | intron | -0.2884209 | 0.0143321 | -0.210645  | 0.0463751 | -0.434971289 | 0.00438672 |
| CSMD1 | rs6558863  | 8 | 4194883 | C | G   | intron | -0.287151  | 0.0298489 | -0.1976817 | 0.0953816 | -0.334792688 | 0.04439991 |
| CSMD1 | rs13273281 | 8 | 4200440 | 0 | A/G | intron | -0.2813383 | 0.1354785 | -0.2431949 | 0.1531136 | -0.636936054 | 0.01245487 |
| CSMD1 | rs13253947 | 8 | 4202182 | G | T   | intron | -0.3230526 | 0.082338  | -0.2871594 | 0.0897218 | -0.652350974 | 0.00976871 |
| CSMD1 | rs17413882 | 8 | 4204310 | C | T   | intron | -0.2494178 | 0.0451321 | -0.2051502 | 0.0676918 | -0.260956246 | 0.09624114 |
| CSMD1 | rs17069985 | 8 | 4204987 | A | G   | intron | -0.2652937 | 0.1437057 | -0.2548463 | 0.1214653 | -0.515022269 | 0.03523944 |
| CSMD1 | rs7832549  | 8 | 4205477 | A | G   | intron | 0.1797436  | 0.0688602 | 0.1544874  | 0.0797848 | 0.249165451  | 0.04799005 |
| CSMD1 | rs13250773 | 8 | 4207082 | C | G   | intron | -0.291359  | 0.1144536 | -0.2650562 | 0.1134346 | -0.561038079 | 0.02530124 |
| CSMD1 | rs13248280 | 8 | 4209955 | A | G   | intron | -0.2972294 | 0.1076676 | -0.2690455 | 0.1085541 | -0.568013761 | 0.02379133 |
| CSMD1 | rs1560428  | 8 | 4210140 | C | G   | intron | -0.2308347 | 0.0211359 | -0.1839385 | 0.0400989 | -0.357197633 | 0.00594629 |
| CSMD1 | rs7832586  | 8 | 4210746 | C | G   | intron | -0.2904785 | 0.0066408 | -0.2207557 | 0.0215741 | -0.395165497 | 0.00413451 |
| CSMD1 | rs10092429 | 8 | 4215270 | A | G   | intron | -0.4697441 | 0.0243344 | -0.4480033 | 0.0213743 | -0.632737062 | 0.0326728  |
| CSMD1 | rs1594353  | 8 | 4225233 | A | G   | intron | -0.130596  | 0.1850348 | -0.1072652 | 0.2194334 | -0.287215884 | 0.02564349 |
| CSMD1 | rs1583652  | 8 | 4226397 | C | G   | intron | -0.3069322 | 0.088265  | -0.24606   | 0.1327426 | -0.50809327  | 0.03688781 |
| CSMD1 | rs11136738 | 8 | 4234680 | A | G   | intron | -0.1458774 | 0.1363931 | -0.1362634 | 0.1180383 | -0.25518358  | 0.04624028 |
| CSMD1 | rs7844370  | 8 | 4253449 | C | G   | intron | -0.5342966 | 0.0109901 | -0.4226716 | 0.0292859 | -0.579580531 | 0.03080434 |
| CSMD1 | rs12676259 | 8 | 4320301 | A | G   | intron | -0.2099693 | 0.1134772 | -0.1236653 | 0.3086199 | -0.347153737 | 0.04639575 |
| CSMD1 | rs1725119  | 8 | 4338477 | A | T   | intron | 0.2276874  | 0.031583  | 0.1969071  | 0.0373214 | 0.217238248  | 0.10292469 |
| CSMD1 | rs6982571  | 8 | 4348020 | A | C   | intron | -0.6547645 | 0.1212501 | -1.161722  | 0.007046  | -1.0644482   | 0.05863713 |
| CSMD1 | rs1997138  | 8 | 4380397 | C | G   | intron | 0.3235461  | 0.0456894 | 0.1992952  | 0.1649131 | 0.182779489  | 0.38893982 |
| CSMD1 | rs1358117  | 8 | 4397042 | C | T   | intron | 0.6526166  | 0.0407514 | 0.4282773  | 0.1188495 | 0.53604601   | 0.16367195 |
| CSMD1 | rs7814036  | 8 | 4405692 | A | G   | intron | 0.4173918  | 0.025374  | 0.3367676  | 0.0380276 | 0.387363044  | 0.08928974 |
| CSMD1 | rs7818189  | 8 | 4405955 | C | T   | intron | -0.2355304 | 0.0286926 | -0.1363434 | 0.1554658 | -0.162309007 | 0.22838864 |
| CSMD1 | rs7831820  | 8 | 4406368 | C | T   | intron | -0.2271981 | 0.0340341 | -0.132797  | 0.1643998 | -0.159602043 | 0.23440751 |
| CSMD1 | rs6992457  | 8 | 4413    |   |     |        |            |           |            |           |              |            |

|        |            |    |           |   |   |             |            |           |            |           |              |            |
|--------|------------|----|-----------|---|---|-------------|------------|-----------|------------|-----------|--------------|------------|
| CSMD1  | rs12677365 | 8  | 4419329   | C | G | intron      | -0.2476196 | 0.0268967 | -0.1182765 | 0.2339205 | -0.181604938 | 0.19571192 |
| CSMD1  | rs2725009  | 8  | 4422926   | A | C | intron      | -0.2394579 | 0.037028  | -0.1340428 | 0.1912642 | -0.164371747 | 0.24797543 |
| CSMD1  | rs2617061  | 8  | 4424370   | C | G | intron      | -0.2471209 | 0.0288673 | -0.1648019 | 0.1036865 | -0.16770638  | 0.23403864 |
| CSMD1  | rs11995080 | 8  | 4442206   | C | T | intron      | -0.1578678 | 0.2550228 | -0.1409773 | 0.2568763 | -0.41390259  | 0.0238     |
| CSMD1  | rs44875364 | 8  | 4444592   | C | T | intron      | 0.2496307  | 0.0671242 | 0.2367959  | 0.0476422 | 0.273892553  | 0.09663362 |
| CSMD1  | rs2724992  | 8  | 4445199   | C | G | intron      | -0.1177585 | 0.2449129 | -0.0985967 | 0.2743626 | -0.264088899 | 0.03962777 |
| CSMD1  | rs11986310 | 8  | 4445860   | A | G | intron      | 0.5904106  | 0.0391301 | 0.5699419  | 0.0196738 | 0.710965726  | 0.03426057 |
| CSMD1  | rs2617078  | 8  | 4445944   | G | T | intron      | -0.112773  | 0.2710356 | -0.1161064 | 0.2044289 | -0.266295878 | 0.04177969 |
| CSMD1  | rs17070693 | 8  | 4447199   | A | G | intron      | 0.590364   | 0.0393862 | 0.5707079  | 0.0196558 | 0.709169501  | 0.03488176 |
| CSMD1  | rs17070710 | 8  | 4449506   | C | T | intron      | -0.6164097 | 0.0387594 | -0.2993742 | 0.2758305 | -1.589524215 | 0.00153303 |
| CSMD1  | rs7018306  | 8  | 4454813   | C | G | intron      | -0.1317546 | 0.2215222 | -0.0418797 | 0.6620671 | -0.325198846 | 0.01638608 |
| CSMD1  | rs2617098  | 8  | 4459341   | A | T | intron      | -0.5089877 | 0.188026  | -0.2382342 | 0.5057027 | -1.837898977 | 0.00589844 |
| CSMD1  | rs2725087  | 8  | 4459506   | A | T | intron      | -0.5075262 | 0.1907785 | -0.2374687 | 0.5086862 | -1.858223619 | 0.00578171 |
| CSMD1  | rs13257897 | 8  | 4459755   | A | T | intron      | -0.1504031 | 0.2404498 | -0.0770293 | 0.5021214 | -0.350052299 | 0.03250502 |
| CSMD1  | rs11781113 | 8  | 4460277   | A | G | intron      | -0.2686629 | 0.0170661 | -0.1960678 | 0.0533225 | -0.508506018 | 0.00039795 |
| CSMD1  | rs13259575 | 8  | 4460811   | C | G | intron      | -0.1495647 | 0.2456353 | -0.077278  | 0.5033906 | -0.348259446 | 0.03435486 |
| CSMD1  | rs13260653 | 8  | 4460880   | A | T | intron      | -0.1494522 | 0.2464148 | -0.0774775 | 0.5027345 | -0.347988386 | 0.03465339 |
| CSMD1  | rs6990838  | 8  | 4461958   | C | T | intron      | -0.3274553 | 0.1119676 | -0.3089474 | 0.1094986 | -0.637172344 | 0.02563114 |
| CSMD1  | rs17070859 | 8  | 4481712   | A | G | intron      | 0.3455153  | 0.1696067 | 0.210462   | 0.3361396 | 0.611872275  | 0.04277551 |
| CSMD1  | rs17070864 | 8  | 4481970   | A | C | intron      | -0.3311896 | 0.0125194 | -0.1371879 | 0.2405443 | -0.398535096 | 0.01550254 |
| CSMD1  | rs2616984  | 8  | 4483141   | A | G | intron      | -0.1676639 | 0.1365951 | -0.2130966 | 0.0362481 | -0.10769493  | 0.45838099 |
| CSMD1  | rs10104818 | 8  | 4484498   | A | G | intron      | -0.1952389 | 0.0985862 | -0.2480356 | 0.0217578 | -0.14886795  | 0.33199841 |
| CSMD1  | rs2724956  | 8  | 4484717   | C | G | intron      | -0.1667105 | 0.1485781 | -0.2277139 | 0.0305213 | -0.114987219 | 0.44408084 |
| CSMD1  | rs4875113  | 8  | 4485185   | A | C | intron      | 0.3681115  | 0.03291   | 0.1423912  | 0.3471728 | 0.330742849  | 0.11689245 |
| CSMD1  | rs2616986  | 8  | 4485684   | C | G | intron      | -0.162975  | 0.1668297 | -0.2235927 | 0.0375249 | -0.107084838 | 0.48619341 |
| CSMD1  | rs3804     | 8  | 4489017   | A | T | intron      | 0.3331704  | 0.0379303 | 0.1552592  | 0.2279651 | 0.311429848  | 0.11586522 |
| CSMD1  | rs10503267 | 8  | 4489552   | C | T | intron      | 0.3207474  | 0.0433305 | 0.1476132  | 0.2899719 | 0.299710822  | 0.12535665 |
| CSMD1  | rs17070920 | 8  | 4491629   | A | T | intron      | 0.3204753  | 0.0473527 | 0.1418855  | 0.3178164 | 0.307329948  | 0.12185476 |
| CSMD1  | rs11993901 | 8  | 4491931   | A | T | intron      | 0.3203256  | 0.0475485 | 0.1417445  | 0.3185178 | 0.307325473  | 0.12200259 |
| CSMD1  | rs4875371  | 8  | 4492509   | C | T | intron      | 0.3188991  | 0.0392344 | 0.1078828  | 0.4287665 | 0.313383293  | 0.10246567 |
| CSMD1  | rs4875372  | 8  | 4492520   | A | C | intron      | 0.3190198  | 0.0392637 | 0.1079422  | 0.4287804 | 0.314016237  | 0.10193773 |
| CSMD1  | rs17070935 | 8  | 4493449   | A | G | intron      | 0.3153848  | 0.0451319 | 0.0972668  | 0.4837711 | 0.307664833  | 0.11453504 |
| CSMD1  | rs2617004  | 8  | 4493979   | A | G | intron      | -0.2452644 | 0.0466623 | -0.273123  | 0.0149748 | -0.228450648 | 0.14915834 |
| CSMD1  | rs11991366 | 8  | 4494048   | G | T | intron      | 0.3537985  | 0.0220846 | 0.16643    | 0.2221445 | 0.343278628  | 0.07600856 |
| CSMD1  | rs4529488  | 8  | 4585550   | C | G | intron      | 0.1612743  | 0.0936563 | 0.1817468  | 0.0338558 | 0.212046119  | 0.0801889  |
| CSMD1  | rs2725079  | 8  | 4567583   | C | G | intron      | 0.1009277  | 0.2996225 | 0.1718113  | 0.0475271 | 0.119593912  | 0.32970229 |
| CSMD1  | rs1457181  | 8  | 4649611   | A | G | intron      | -0.205768  | 0.0539916 | -0.1962099 | 0.0409581 | -0.229503323 | 0.09056186 |
| CSMD1  | rs11786958 | 8  | 4650764   | C | T | intron      | -0.2126154 | 0.0436287 | -0.1887975 | 0.0456051 | -0.214063474 | 0.10823253 |
| CSMD1  | rs13252930 | 8  | 4651961   | A | C | intron      | -0.2128764 | 0.0441361 | -0.1932675 | 0.0416025 | -0.206599779 | 0.12229321 |
| CSMD1  | rs13251215 | 8  | 4652448   | A | G | intron      | -0.2276675 | 0.0322226 | -0.2197345 | 0.0212893 | -0.21733258  | 0.10489612 |
| CSMD1  | rs13251256 | 8  | 4652490   | C | G | intron      | -0.2113258 | 0.0448783 | -0.1873344 | 0.0472824 | -0.21349175  | 0.10925293 |
| CSMD1  | rs13251493 | 8  | 4652510   | C | G | intron      | -0.2110862 | 0.04511   | -0.187048  | 0.0476143 | -0.213434947 | 0.10935826 |
| CSMD1  | rs11136779 | 8  | 4659274   | G | T | intron      | -0.2284908 | 0.0336624 | -0.2092053 | 0.0304338 | -0.199268805 | 0.1425373  |
| CSMD1  | rs6558946  | 8  | 4807157   | C | T | intron      | 0.3472016  | 0.1563142 | 0.4670161  | 0.04627   | 0.300448438  | 0.34227887 |
| CSMD1  | rs7005169  | 8  | 4807919   | A | C | intron      | 0.351284   | 0.1515148 | 0.4667044  | 0.0463904 | 0.302757759  | 0.33870385 |
| CSMD1  | rs7004535  | 8  | 4808243   | C | G | intron      | 0.3535403  | 0.148852  | 0.467047   | 0.0462102 | 0.30402555   | 0.3366601  |
| CSMD1  | rs6981024  | 8  | 4815560   | C | G | intron      | 0.2794902  | 0.0379373 | 0.2549631  | 0.0375606 | 0.326228329  | 0.05682687 |
| CSMD1  | rs7017888  | 8  | 4815582   | G | T | intron      | 0.2462824  | 0.0448896 | 0.2155793  | 0.0547005 | 0.30363749   | 0.05279324 |
| CSMD1  | rs6558949  | 8  | 4816528   | G | T | intron      | 0.2815549  | 0.0348955 | 0.2555814  | 0.0353276 | 0.324595102  | 0.05553363 |
| CSMD1  | rs6985569  | 8  | 4816748   | C | G | intron      | 0.281878   | 0.0345787 | 0.2557914  | 0.0350726 | 0.324705686  | 0.05529258 |
| CSMD1  | rs10104410 | 8  | 4819971   | A | G | intron      | 0.3277622  | 0.0122554 | 0.2780183  | 0.0201286 | 0.386527966  | 0.02141945 |
| CSMD1  | rs7011965  | 8  | 4820177   | A | G | intron      | 0.3277408  | 0.0121675 | 0.2777835  | 0.0200719 | 0.386322834  | 0.02131485 |
| CSMD1  | rs17071931 | 8  | 4820695   | A | T | intron      | 0.129043   | 0.323002  | 0.2269785  | 0.0475247 | 0.054770213  | 0.73681097 |
| CSMD1  | rs7016302  | 8  | 4833041   | C | G | intron      | -0.2273855 | 0.0756211 | -0.0490856 | 0.6649581 | -0.411861356 | 0.0116811  |
| IL2RA  | rs12722519 | 10 | 6079649   | C | T | intron      | 0.6332034  | 0.0432748 | 0.2270067  | 0.4040827 | 0.802282078  | 0.04461791 |
| IL2RA  | rs12722514 | 10 | 6081406   | C | T | intron      | 0.6284502  | 0.0430477 | 0.2273147  | 0.3994063 | 0.796405706  | 0.04327519 |
| IL2RA  | rs765060   | 10 | 6081935   | C | T | intron      | 0.62471    | 0.0433694 | 0.2084192  | 0.4382091 | 0.799010967  | 0.04137753 |
| CD6    | rs1859206  | 11 | 60738832  | C | T | near-gene-5 | 0.3971848  | 0.1088309 | 0.456121   | 0.0355261 | 0.647815291  | 0.02150632 |
| CD6    | rs2905690  | 11 | 60739751  | C | T | intron      | 0.39899233 | 0.1080949 | 0.4578735  | 0.0349748 | 0.651197114  | 0.02114878 |
| CD6    | rs2905504  | 11 | 60742788  | A | G | intron      | -0.2825724 | 0.0171488 | -0.101014  | 0.3371911 | -0.414182257 | 0.00562057 |
| CD6    | rs3019561  | 11 | 60743853  | G | T | intron      | -0.2835203 | 0.0167872 | -0.1016137 | 0.3343717 | -0.415178794 | 0.00550667 |
| CD6    | rs3019548  | 11 | 60748939  | A | G | intron      | -0.191343  | 0.0763925 | -0.0601555 | 0.5281322 | -0.286759996 | 0.03788729 |
| CD6    | rs2905509  | 11 | 60756588  | C | T | intron      | -0.1885554 | 0.0705265 | -0.0731935 | 0.4261907 | -0.26073938  | 0.04747117 |
| CD6    | rs2905517  | 11 | 60768044  | A | G | intron      | 0.2142056  | 0.029039  | 0.1701463  | 0.051643  | 0.207583406  | 0.09155041 |
| CSMD1  | rs12418513 | 11 | 123738694 | A | G | intron      | -0.3742584 | 0.0013231 | -0.3119224 | 0.0033118 | -0.432255099 | 0.0042876  |
| PDZRN4 | rs2608709  | 12 | 41856777  | C | G | intron      | 0.2384053  | 0.0439452 | 0.1185405  | 0.2642616 | 0.18110843   | 0.22481366 |
| PDZRN4 | rs10785269 | 12 | 41857421  | C | T | intron      | 0.2381646  | 0.0439963 | 0.1182578  | 0.2651101 | 0.180239802  | 0.22688954 |
| PDZRN4 | rs3110189  | 12 | 41859018  | A | T | intron      | 0.2381198  | 0.0440012 | 0.1181988  | 0.265286  | 0.180025327  | 0.22741644 |
| PDZRN4 | rs11180936 | 12 | 41865737  | G | T | intron      | -0.2511717 | 0.0368746 | -0.1263143 | 0.2421172 | -0.205842994 | 0.17653729 |
| PDZRN4 | rs11180943 | 12 | 41872743  | A | G | intron      | -0.2572474 | 0.0334576 | -0.1468207 | 0.1766762 | -0.211765749 | 0.16631198 |
| PDZRN4 | rs17579291 | 12 | 41882598  | A | G | intron      | -0.244771  | 0.0410184 | -0.1429341 | 0.1843666 | -0.20263902  | 0.18145057 |
| PDZRN4 | rs10880081 | 12 | 41884344  | A | T | intron      | -0.2396437 | 0.0452293 | -0.1373814 | 0.2015404 | -0.201516928 | 0.18355764 |
| PDZRN4 | rs4768355  | 12 | 41891909  | A | T | intron      | -0.2380894 | 0.0468092 | -0.1297585 | 0.2276947 | -0.197441531 | 0.1917403  |
| PDZRN4 | rs10880082 | 12 | 41895573  | A | C | intron      | -0.2377413 | 0.0471198 | -0.1292356 | 0.2295172 | -0.197028953 | 0.19258589 |
| PDZRN4 | rs285569   | 12 | 41960165  | G | T | intron      | -0.3065983 | 0.0180208 | -0.1966345 | 0.0933007 | -0.247219178 | 0.12970576 |
| PDZRN4 | rs285568   | 12 | 41961096  | A | G | intron      | -0.3058639 | 0.018212  | -0.1963098 | 0.0935554 | -0.245877554 | 0.13145623 |
| PDZRN4 | rs17582686 | 12 | 41961745  | C | T | intron      | -0.3586203 | 0.0148823 | -0.2492165 | 0.0626413 | -0.340107189 | 0.07051132 |
| GPC5   | rs7993829  | 13 | 92156920  | C | G | intron      | -0.2808023 | 0.0458067 | -0.1700133 | 0.1718008 | -0.148052391 | 0.39618396 |
| GPC5   | rs16946071 | 13 | 92163357  | C | T | intron      | 0.6018524  | 0.0015539 | 0.3426386  | 0.0386866 | 0.433820364  | 0.05923049 |
| GPC5   | rs16946095 | 13 | 92173289  | A | T | intron      | 0.5999063  | 0.0013366 | 0.3430989  | 0.0349954 | 0.43468477   | 0.05390276 |
| GPC5   | rs10492619 | 13 | 92178895  | A | G | intron      | 0.5991341  | 0.0013514 | 0.3400163  | 0.0366202 | 0.434962593  | 0.05365271 |
| GPC5   | rs17419728 | 13 | 92223140  | C | G | intron      | 0.3397058  | 0.0360431 | 0.2088575  | 0.1417378 | 0.211161628  | 0.27738334 |
| GPC5   | rs9589296  | 13 | 92223762  | G | T | intron      | -0.2030099 | 0.0489456 | -0.1144463 | 0.2107634 | -0.143077805 | 0.         |

Sheet1

|      |            |    |          |   |   |        |            |           |            |           |              |            |
|------|------------|----|----------|---|---|--------|------------|-----------|------------|-----------|--------------|------------|
| GPC5 | rs1326741  | 13 | 92261830 | C | T | intron | 0.3348862  | 0.0109255 | 0.2721213  | 0.0185182 | 0.269809664  | 0.10418457 |
| GPC5 | rs9515956  | 13 | 92262024 | C | T | intron | -0.2138634 | 0.0496928 | -0.1928349 | 0.0443266 | -0.157527538 | 0.2418121  |
| GPC5 | rs17420943 | 13 | 92262991 | C | T | intron | 0.4473272  | 0.0480224 | 0.2306053  | 0.2418848 | 0.179817141  | 0.50395391 |
| GPC5 | rs1409605  | 13 | 92283533 | C | T | intron | 0.2846765  | 0.0452776 | 0.2918033  | 0.0193369 | 0.297395815  | 0.09750122 |
| GPC5 | rs6492556  | 13 | 92283820 | A | G | intron | 0.2848763  | 0.0451995 | 0.2920378  | 0.0192803 | 0.297694133  | 0.0972686  |
| GPC5 | rs1926661  | 13 | 92284310 | G | T | intron | 0.2849251  | 0.0452202 | 0.2920936  | 0.0192904 | 0.297783629  | 0.09725924 |
| GPC5 | rs2038953  | 13 | 92286322 | C | T | intron | 0.2862919  | 0.0453809 | 0.2938083  | 0.0192629 | 0.293882651  | 0.09795018 |
| GPC5 | rs6492557  | 13 | 92292553 | G | T | intron | 0.2994609  | 0.0495448 | 0.3129459  | 0.0193846 | 0.308600755  | 0.10844664 |
| GPC5 | rs2182544  | 13 | 92294834 | G | T | intron | 0.3009703  | 0.049314  | 0.314578   | 0.0192436 | 0.309802209  | 0.108465   |
| GPC5 | rs9523402  | 13 | 92381450 | A | G | intron | -0.2150292 | 0.0341374 | -0.1794151 | 0.0495356 | -0.218374948 | 0.08177229 |
| GPC5 | rs4771843  | 13 | 92405287 | A | T | intron | -0.2491939 | 0.0092088 | -0.2344526 | 0.0062157 | -0.232811023 | 0.05096886 |
| GPC5 | rs9560849  | 13 | 92408087 | A | T | intron | -0.2875986 | 0.0870151 | -0.1481441 | 0.3136186 | -0.450031608 | 0.03370147 |
| GPC5 | rs3783054  | 13 | 92408505 | G | T | intron | -0.2457012 | 0.0091347 | -0.2311992 | 0.006083  | -0.228575492 | 0.05146392 |
| GPC5 | rs2174504  | 13 | 92410270 | A | C | intron | -0.2384907 | 0.0114394 | -0.2288147 | 0.006641  | -0.213492951 | 0.0702284  |
| GPC5 | rs17668312 | 13 | 92413395 | C | T | intron | 1.12362    | 0.0047986 | 0.9958031  | 0.0028196 | 0.99295296   | 0.03340272 |
| GPC5 | rs1412313  | 13 | 92416553 | A | G | intron | 1.110827   | 0.005602  | 0.983966   | 0.0030088 | 0.986026777  | 0.03502793 |
| GPC5 | rs12050058 | 13 | 92417970 | A | G | intron | 1.109518   | 0.0050626 | 0.9818564  | 0.0030406 | 0.983855705  | 0.03528861 |
| GPC5 | rs9560852  | 13 | 92419732 | C | T | intron | 1.110909   | 0.0049815 | 0.9815024  | 0.0030361 | 0.984529046  | 0.03509368 |
| GPC5 | rs9523407  | 13 | 92420372 | A | C | intron | -0.2142952 | 0.0294099 | -0.2178374 | 0.0132488 | -0.13069725  | 0.28182588 |
| GPC5 | rs9515967  | 13 | 92420510 | C | T | intron | -0.2072396 | 0.0297997 | -0.2134015 | 0.0123212 | -0.120671549 | 0.30839345 |
| GPC5 | rs9515968  | 13 | 92420551 | A | G | intron | -0.2148703 | 0.0250735 | -0.2168388 | 0.0114452 | -0.136622031 | 0.24908136 |
| GPC5 | rs1332092  | 13 | 92421439 | A | C | intron | -0.214362  | 0.0253276 | -0.2167105 | 0.0114326 | -0.136210167 | 0.25023634 |
| GPC5 | rs4773648  | 13 | 92423630 | A | G | intron | -0.2360326 | 0.0153133 | -0.213509  | 0.0138852 | -0.187960509 | 0.11658499 |
| GPC5 | rs9515971  | 13 | 92424209 | A | G | intron | -0.2403288 | 0.0109467 | -0.2276885 | 0.006979  | -0.184768689 | 0.11222137 |
| GPC5 | rs1542158  | 13 | 92425008 | C | T | intron | -0.1782304 | 0.0602    | -0.169157  | 0.0449118 | -0.132353999 | 0.25834429 |
| GPC5 | rs9523410  | 13 | 92425967 | C | T | intron | -0.2362279 | 0.0127308 | -0.2356366 | 0.0054146 | -0.182432417 | 0.12079289 |
| GPC5 | rs1445396  | 13 | 92426880 | A | G | intron | -0.185143  | 0.0523457 | -0.1840522 | 0.0301835 | -0.146710278 | 0.21352455 |
| GPC5 | rs9560853  | 13 | 92428051 | C | T | intron | 0.9694121  | 0.0120271 | 0.8583353  | 0.0081141 | 0.857952278  | 0.05868106 |
| GPC5 | rs342697   | 13 | 92428976 | A | G | intron | 0.2093749  | 0.0426753 | 0.2126803  | 0.0192708 | 0.189315786  | 0.13088026 |
| GPC5 | rs9523412  | 13 | 92429361 | C | T | intron | -0.2412618 | 0.012552  | -0.2422971 | 0.0050557 | -0.198951262 | 0.09827517 |
| GPC5 | rs9301750  | 13 | 92429514 | C | T | intron | -0.230795  | 0.0146274 | -0.2343612 | 0.0055493 | -0.184314197 | 0.11695828 |
| GPC5 | rs1854980  | 13 | 92433957 | A | G | intron | -0.2080005 | 0.030175  | -0.219123  | 0.010853  | -0.142384743 | 0.23442049 |
| GPC5 | rs3864180  | 13 | 92436488 | A | G | intron | -0.2079708 | 0.0302212 | -0.2191471 | 0.010853  | -0.142512244 | 0.23406164 |
| GPC5 | rs2352202  | 13 | 92456283 | C | T | intron | -0.2106255 | 0.0323223 | -0.2396933 | 0.0063385 | -0.11324471  | 0.35465781 |
| GPC5 | rs9515975  | 13 | 92456597 | A | C | intron | -0.1818472 | 0.0827983 | -0.230498  | 0.0136488 | -0.08156173  | 0.53154656 |
| GPC5 | rs1831564  | 13 | 92457768 | C | T | intron | -0.2115901 | 0.0313605 | -0.2403679 | 0.0061426 | -0.113173427 | 0.3545357  |
| GPC5 | rs9301756  | 13 | 92458607 | A | G | intron | -0.1534333 | 0.1183634 | -0.1849255 | 0.0340942 | -0.058285639 | 0.63355551 |
| GPC5 | rs1831565  | 13 | 92458911 | A | G | intron | -0.2115998 | 0.0313521 | -0.2403787 | 0.0061402 | -0.113185825 | 0.35448198 |
| GPC5 | rs1505565  | 13 | 92462364 | A | T | intron | -0.211607  | 0.0313464 | -0.2403896 | 0.0061379 | -0.11318675  | 0.35447725 |
| GPC5 | rs1847713  | 13 | 92462727 | A | G | intron | -0.21267   | 0.0252108 | -0.2163489 | 0.0108709 | -0.148571013 | 0.20722176 |
| GPC5 | rs1988500  | 13 | 92462942 | A | G | intron | -0.2116062 | 0.0313468 | -0.2403869 | 0.0061384 | -0.113182215 | 0.35449763 |
| GPC5 | rs1394888  | 13 | 92464226 | A | G | intron | -0.2116003 | 0.0313519 | -0.2403802 | 0.0061399 | -0.113170597 | 0.35454813 |
| GPC5 | rs1827755  | 13 | 92464742 | C | T | intron | -0.2126846 | 0.0305862 | -0.2408916 | 0.0060584 | -0.114277048 | 0.35021433 |
| GPC5 | rs9560860  | 13 | 92464980 | C | T | intron | 0.825555   | 0.0266566 | 0.7270675  | 0.0204477 | 0.763543551  | 0.08252645 |
| GPC5 | rs7985030  | 13 | 92468571 | A | C | intron | 0.8196304  | 0.0278082 | 0.7180026  | 0.0221394 | 0.758383187  | 0.083828   |
| GPC5 | rs7995788  | 13 | 92469478 | C | T | intron | -0.1586702 | 0.1069027 | -0.1884143 | 0.0311124 | -0.062926423 | 0.60753265 |
| GPC5 | rs9560863  | 13 | 92470793 | A | G | intron | -0.1598167 | 0.1044413 | -0.1891399 | 0.030487  | -0.063975956 | 0.60161033 |
| GPC5 | rs9523424  | 13 | 92476602 | A | G | intron | -0.2113157 | 0.0263358 | -0.213865  | 0.0119042 | -0.145717846 | 0.21706424 |
| GPC5 | rs9515980  | 13 | 92476627 | A | G | intron | -0.246594  | 0.0093384 | -0.2417625 | 0.0043688 | -0.202495753 | 0.08374108 |
| GPC5 | rs7995130  | 13 | 92481236 | A | G | intron | -0.1588364 | 0.1068262 | -0.1899909 | 0.029854  | -0.062159285 | 0.6122597  |
| GPC5 | rs7995950  | 13 | 92483970 | C | T | intron | -0.1940524 | 0.0406063 | -0.1935919 | 0.0217411 | -0.154167355 | 0.18925961 |
| GPC5 | rs9515981  | 13 | 92490952 | C | T | intron | -0.2107981 | 0.0266968 | -0.2141495 | 0.0117859 | -0.144471686 | 0.22119165 |
| GPC5 | rs7990703  | 13 | 92492002 | C | T | intron | -0.1585961 | 0.1074962 | -0.1929255 | 0.0274962 | -0.059900896 | 0.62546816 |
| GPC5 | rs7986386  | 13 | 92492127 | A | G | intron | -0.1951532 | 0.0392993 | -0.1971529 | 0.0193521 | -0.15230584  | 0.19461492 |
| GPC5 | rs1537027  | 13 | 92495728 | C | T | intron | -0.1510283 | 0.1096328 | -0.1676485 | 0.0460858 | -0.085860529 | 0.46649461 |
| GPC5 | rs9589358  | 13 | 92496197 | C | T | intron | 0.8175904  | 0.0280134 | 0.6634017  | 0.0340422 | 0.747585061  | 0.08167516 |
| GPC5 | rs1999231  | 13 | 92497920 | C | T | intron | -0.2315575 | 0.0149112 | -0.2336342 | 0.0060718 | -0.15747648  | 0.18435554 |
| GPC5 | rs17668748 | 13 | 92501540 | C | T | intron | 0.7994817  | 0.029575  | 0.6490472  | 0.0354112 | 0.712126687  | 0.08449188 |
| GPC5 | rs7993839  | 13 | 92505786 | G | T | intron | 0.2182223  | 0.1085638 | 0.1402395  | 0.2383531 | 0.333002875  | 0.04954803 |
| GPC5 | rs8000830  | 13 | 92505881 | C | T | intron | 0.2178353  | 0.1091543 | 0.1402118  | 0.2384025 | 0.337124754  | 0.00862712 |
| GPC5 | rs7985482  | 13 | 92507188 | C | T | intron | 0.2825744  | 0.04211   | 0.1928297  | 0.1125872 | 0.382428701  | 0.02609447 |
| GPC5 | rs7984514  | 13 | 92507887 | A | G | intron | 0.2818232  | 0.0425846 | 0.1928457  | 0.1124333 | 0.382144193  | 0.02611751 |
| GPC5 | rs7996921  | 13 | 92508621 | A | T | intron | 0.2798094  | 0.0467319 | 0.1839262  | 0.1350476 | 0.379469658  | 0.02929869 |
| GPC5 | rs7992519  | 13 | 92509181 | A | C | intron | 0.2820481  | 0.042773  | 0.1939081  | 0.1110633 | 0.380866667  | 0.02681275 |
| GPC5 | rs9560869  | 13 | 92510221 | C | T | intron | 0.7546179  | 0.0382936 | 0.641741   | 0.035954  | 0.701343713  | 0.08860978 |
| GPC5 | rs7984987  | 13 | 92510929 | C | T | intron | 0.2828899  | 0.0428759 | 0.1967543  | 0.1071243 | 0.378608506  | 0.02813133 |
| GPC5 | rs9560870  | 13 | 92511214 | C | G | intron | 0.2830506  | 0.0429442 | 0.1974565  | 0.1061972 | 0.377777209  | 0.02858891 |
| GPC5 | rs7997028  | 13 | 92512354 | A | C | intron | 0.2826298  | 0.0434968 | 0.1978135  | 0.1059867 | 0.375632775  | 0.02966957 |
| GPC5 | rs9556124  | 13 | 92513489 | A | G | intron | 0.297992   | 0.0319925 | 0.2195718  | 0.0708861 | 0.363532537  | 0.03483769 |
| GPC5 | rs9560874  | 13 | 92514822 | A | C | intron | 0.7735076  | 0.0353569 | 0.6708132  | 0.0297172 | 0.70428334   | 0.08826903 |
| GPC5 | rs9560875  | 13 | 92515927 | C | T | intron | 0.7736831  | 0.0353546 | 0.6715417  | 0.0295657 | 0.703897546  | 0.08847416 |
| GPC5 | rs9523440  | 13 | 92519053 | C | T | intron | -0.1718983 | 0.0703896 | -0.1796365 | 0.0341704 | -0.105037704 | 0.36966435 |
| GPC5 | rs12431259 | 13 | 92522253 | A | G | intron | 0.7757785  | 0.035767  | 0.6813074  | 0.0279332 | 0.701813459  | 0.09112731 |
| GPC5 | rs2065193  | 13 | 92526445 | A | T | intron | -0.1749767 | 0.0737503 | -0.1832813 | 0.0364134 | -0.101067408 | 0.40641747 |
| GPC5 | rs1330469  | 13 | 92548841 | C | T | intron | 0.150734   | 0.1081044 | 0.1773987  | 0.0338378 | 0.179445524  | 0.12238103 |
| GPC5 | rs17267116 | 13 | 92787557 | A | C | intron | 0.2997156  | 0.0388101 | 0.2165572  | 0.0929543 | 0.266035709  | 0.13204918 |
| GPC5 | rs1330987  | 13 | 92828701 | G | T | intron | 0.3404282  | 0.0241173 | 0.1964175  | 0.1393411 | 0.381438864  | 0.04037582 |
| GPC5 | rs12872259 | 13 | 92882063 | A | G | intron | -0.3000286 | 0.0470727 | -0.2001719 | 0.1381157 | -0.321550764 | 0.07969085 |
| GPC5 | rs16947178 | 13 | 92911745 | A | G | intron | -0.3315125 | 0.0276564 | -0.219387  | 0.1032812 | -0.368261364 | 0.04452654 |
| GPC5 | rs16947202 | 13 | 92919435 | G | T | intron | 0.4142024  | 0.0563605 | 0.203787   | 0.2808718 | 0.74939994   | 0.00500095 |
| GPC5 | rs10492501 | 13 | 92923825 | C | T | intron | 0.414498   | 0.0511967 | 0.2076869  | 0.2617801 | 0.743542226  | 0.00447053 |
| GPC5 | rs17429394 | 13 | 92928145 | A | G | intron | 0.4125784  | 0.0532726 | 0.2197734  | 0.2367394 | 0.748425738  | 0.00427746 |
| GPC5 | rs17429575 | 13 | 92930064 | A | C | intron | 0.4122849  | 0.053766  | 0.2194153  | 0.2381554 | 0.749933816  | 0.00425295 |

|         |            |    |          |   |   |                   |            |           |            |           |              |            |
|---------|------------|----|----------|---|---|-------------------|------------|-----------|------------|-----------|--------------|------------|
| GPC5    | rs17430373 | 13 | 92964812 | A | G | intron            | 0.8262365  | 0.0039545 | 0.521124   | 0.0366407 | 1.432016517  | 0.00003119 |
| GPC5    | rs12877104 | 13 | 92965743 | A | C | intron            | 0.8486373  | 0.0392306 | 0.3363287  | 0.3392478 | 0.945795714  | 0.04154615 |
| GPC5    | rs9584014  | 13 | 92966163 | C | T | intron            | 0.3946178  | 0.0513015 | 0.2336916  | 0.1842207 | 0.765804073  | 0.00195627 |
| GPC5    | rs9301795  | 13 | 92967948 | A | G | intron            | 0.3938286  | 0.0518574 | 0.2334226  | 0.1849045 | 0.765618822  | 0.00197033 |
| GPC5    | rs9584015  | 13 | 92968290 | C | T | intron            | 0.3933597  | 0.0521936 | 0.2331991  | 0.1854431 | 0.765556674  | 0.00197884 |
| GPC5    | rs16947365 | 13 | 92969050 | A | C | intron            | 0.3428814  | 0.1109063 | 0.1588434  | 0.3966469 | 0.753016527  | 0.00389633 |
| GPC5    | rs9584016  | 13 | 92971863 | C | T | intron            | 0.3899606  | 0.0549691 | 0.2326695  | 0.1877832 | 0.766741411  | 0.00202508 |
| GPC5    | rs12871876 | 13 | 92972732 | C | T | intron            | 0.8433005  | 0.0410729 | 0.3368485  | 0.3400319 | 0.944459537  | 0.0420111  |
| GPC5    | rs7993023  | 13 | 92974307 | A | G | intron            | 0.7557462  | 0.0221366 | 0.4465985  | 0.1114113 | 0.865253376  | 0.02549227 |
| GPC5    | rs16947465 | 13 | 93013596 | G | T | intron            | 0.3621815  | 0.102924  | 0.1752331  | 0.365314  | 0.79747196   | 0.00294373 |
| GPC5    | rs12868141 | 13 | 93016526 | C | T | intron            | 0.9523901  | 0.0297224 | 0.4165756  | 0.2636961 | 1.044108922  | 0.03049416 |
| GPC5    | rs12583412 | 13 | 93026077 | C | T | intron            | -0.2182379 | 0.130151  | -0.1226751 | 0.3326803 | -0.469195008 | 0.00713308 |
| GPC5    | rs2182841  | 13 | 93062256 | C | T | intron            | 0.1466721  | 0.4461055 | 0.0787706  | 0.6428418 | 0.664259038  | 0.00515478 |
| GPC5    | rs2209837  | 13 | 93073297 | A | G | intron            | 0.0943566  | 0.4383568 | 0.0162707  | 0.8797535 | 0.312769334  | 0.03415054 |
| GPC5    | rs720801   | 13 | 93074341 | A | C | intron            | -0.1098001 | 0.3478864 | -0.0445411 | 0.6663222 | -0.32588771  | 0.02280289 |
| GPC5    | rs4545664  | 13 | 93074815 | C | T | intron            | -0.1109531 | 0.3439415 | -0.0484322 | 0.6399449 | -0.325195471 | 0.02338081 |
| GPC5    | rs2149064  | 13 | 93075529 | C | G | intron            | 0.0931797  | 0.4437895 | 0.019474   | 0.8561875 | 0.308977277  | 0.03639768 |
| GPC5    | rs7994262  | 13 | 93077170 | C | T | intron            | 0.0930114  | 0.4445758 | 0.0194456  | 0.8563821 | 0.308760742  | 0.03652193 |
| GPC5    | rs16947594 | 13 | 93080774 | C | T | intron            | 0.0875876  | 0.4714705 | 0.0178977  | 0.8676788 | 0.304116281  | 0.03952092 |
| GPC5    | rs7989492  | 13 | 93085946 | A | C | intron            | 0.0876324  | 0.4722474 | 0.0185894  | 0.8629589 | 0.304197613  | 0.03988166 |
| GPC5    | rs2149065  | 13 | 93088176 | A | G | intron            | 0.1174459  | 0.3297156 | 0.0337914  | 0.7507953 | 0.350309592  | 0.01679945 |
| GPC5    | rs7991869  | 13 | 93090345 | C | T | intron            | 0.1182083  | 0.3273218 | 0.0344733  | 0.7463398 | 0.351288891  | 0.01659374 |
| GPC5    | rs7330819  | 13 | 93091818 | A | C | intron            | 0.130723   | 0.5056374 | 0.0735473  | 0.6717834 | 0.623532987  | 0.00965478 |
| GPC5    | rs7320220  | 13 | 93093322 | C | T | intron            | -0.1113311 | 0.3474037 | -0.0501412 | 0.6321967 | -0.331036211 | 0.02221997 |
| GPC5    | rs7320711  | 13 | 93094111 | A | C | intron            | -0.1116701 | 0.3460726 | -0.0503582 | 0.6307983 | -0.331530161 | 0.02204699 |
| GPC5    | rs7320877  | 13 | 93094173 | C | G | intron            | 0.1390135  | 0.4800803 | 0.0808406  | 0.642198  | 0.625991756  | 0.00946395 |
| GPC5    | rs16947619 | 13 | 93095917 | A | G | intron            | 0.135484   | 0.4919377 | 0.0768542  | 0.6592869 | 0.619929207  | 0.01026864 |
| GPC5    | rs12859741 | 13 | 93097125 | C | T | intron            | -0.1373545 | 0.2423563 | -0.0635581 | 0.5404949 | -0.368464251 | 0.01025793 |
| GPC5    | rs4405428  | 13 | 93118518 | C | T | intron            | 0.1439259  | 0.1622462 | 0.0941838  | 0.3010264 | 0.252032007  | 0.0488495  |
| GPC5    | rs634099   | 13 | 93168982 | A | T | intron            | 0.1467887  | 0.1548025 | 0.1798615  | 0.0492945 | 0.225668621  | 0.07846275 |
| GPC5    | rs606022   | 13 | 93177261 | A | T | intron            | 0.1472147  | 0.1548124 | 0.1804533  | 0.0492557 | 0.256763892  | 0.07820617 |
| GPC5    | rs16947827 | 13 | 93282113 | C | T | intron            | 0.2764636  | 0.0267882 | 0.1868427  | 0.090533  | 0.117651236  | 0.43931287 |
| GPC5    | rs9523739  | 13 | 93289806 | A | C | intron            | -0.2311515 | 0.2360745 | -0.0821773 | 0.6409204 | -0.561886972 | 0.04363168 |
| GPC5    | rs9301827  | 13 | 93294367 | C | T | intron            | -0.2279504 | 0.2396293 | -0.0755727 | 0.6655851 | -0.546830871 | 0.04700321 |
| GPC5    | rs7334843  | 13 | 93296384 | C | T | intron            | -0.2391984 | 0.2148726 | -0.0838064 | 0.6300263 | -0.558877183 | 0.04097877 |
| GPC5    | rs7335480  | 13 | 93296694 | C | T | intron            | -0.2396673 | 0.2139125 | -0.083107  | 0.6327899 | -0.560707259 | 0.040431   |
| GPC5    | rs1855366  | 13 | 93304940 | C | G | intron            | -0.2483095 | 0.1986021 | -0.0906392 | 0.6033061 | -0.573653811 | 0.03758946 |
| GPC5    | rs2007557  | 13 | 93305318 | A | G | intron            | -0.2484237 | 0.1984281 | -0.09075   | 0.6028997 | -0.573817793 | 0.03756623 |
| GPC5    | rs4771861  | 13 | 93312631 | G | T | intron            | -0.2495745 | 0.1980253 | -0.0916283 | 0.6006353 | -0.574193839 | 0.03795572 |
| GPC5    | rs7994061  | 13 | 93427789 | C | G | intron            | 0.1948989  | 0.0962477 | 0.2182442  | 0.0354501 | 0.250536572  | 0.07448076 |
| CLEC16A | rs16957801 | 16 | 11039202 | A | G | intron            | 0.6527075  | 0.0309396 | 0.6850067  | 0.0102308 | 0.604245389  | 0.10415098 |
| CLEC16A | rs12922318 | 16 | 11040626 | A | T | intron            | -0.431664  | 0.0006519 | -0.3551569 | 0.0014709 | -0.463588974 | 0.00272407 |
| CLEC16A | rs6498138  | 16 | 11045278 | A | T | intron            | -0.4294824 | 0.0016694 | -0.3673307 | 0.0020539 | -0.416511044 | 0.00902513 |
| CLEC16A | rs10492842 | 16 | 11045593 | A | T | intron            | 0.670459   | 0.0212698 | 0.659432   | 0.0113694 | 0.784817999  | 0.03015173 |
| CLEC16A | rs8059156  | 16 | 11045992 | C | T | intron            | -0.3451829 | 0.0224839 | -0.2760206 | 0.0348474 | -0.311859981 | 0.0712564  |
| CLEC16A | rs12443971 | 16 | 11046826 | A | G | intron            | -0.1329875 | 0.1589471 | -0.1772469 | 0.0349528 | -0.198428372 | 0.09063387 |
| CLEC16A | rs6498139  | 16 | 11047923 | A | G | intron            | -0.4277023 | 0.001758  | -0.3666567 | 0.0021082 | -0.416039884 | 0.0091661  |
| CLEC16A | rs7185978  | 16 | 11048274 | A | T | intron            | -0.4275788 | 0.0017663 | -0.3667128 | 0.0021086 | -0.416340036 | 0.00913229 |
| CLEC16A | rs7192171  | 16 | 11049119 | C | T | intron            | -0.3419302 | 0.0237824 | -0.2745051 | 0.0358692 | -0.308882966 | 0.0731495  |
| CLEC16A | rs16957835 | 16 | 11052055 | G | T | intron            | -0.3414926 | 0.0239615 | -0.2742981 | 0.0360101 | -0.309549074 | 0.07346554 |
| CLEC16A | rs4781027  | 16 | 11052448 | A | G | intron            | -0.1402694 | 0.1368508 | -0.1812611 | 0.0308981 | -0.207151213 | 0.07768576 |
| CLEC16A | rs7404554  | 16 | 11052924 | C | T | intron            | -0.135116  | 0.1512157 | -0.1791419 | 0.0325563 | -0.199843462 | 0.08772382 |
| CLEC16A | rs16957836 | 16 | 11053086 | A | G | intron            | -0.3393443 | 0.0248159 | -0.2733294 | 0.0366283 | -0.308464434 | 0.07442978 |
| CLEC16A | rs16957839 | 16 | 11056378 | C | T | coding-synonymous | -0.3359531 | 0.0262327 | -0.2717519 | 0.0376748 | -0.306175478 | 0.07654267 |
| CLEC16A | rs1700820  | 16 | 11056618 | C | T | intron            | -0.158085  | 0.0922916 | -0.1983635 | 0.0179466 | -0.222909358 | 0.0574553  |
| CLEC16A | rs1700818  | 16 | 11057269 | C | G | intron            | -0.1583515 | 0.0918039 | -0.198453  | 0.0179162 | -0.22289745  | 0.05755097 |
| CLEC16A | rs8059260  | 16 | 11060151 | A | G | intron            | -0.4263099 | 0.0018378 | -0.367034  | 0.0021095 | -0.418786708 | 0.0088016  |
| CLEC16A | rs8049278  | 16 | 11062623 | G | T | intron            | -0.3324609 | 0.0277305 | -0.270098  | 0.0387427 | -0.30366998  | 0.07879642 |
| CLEC16A | rs2302558  | 16 | 11063011 | A | G | intron            | -0.3395683 | 0.0248921 | -0.2767997 | 0.0345139 | -0.307815891 | 0.07554521 |
| CLEC16A | rs17803698 | 16 | 11070289 | A | G | intron            | -0.2694503 | 0.0484958 | -0.2422335 | 0.0411877 | -0.242007725 | 0.13248239 |
| CLEC16A | rs16957854 | 16 | 11070323 | C | T | intron            | -0.4470444 | 0.0087649 | -0.371556  | 0.0113236 | -0.414457233 | 0.03137433 |
| CLEC16A | rs8055893  | 16 | 11071795 | C | T | intron            | -0.3575927 | 0.0184181 | -0.2949753 | 0.0244737 | -0.317142891 | 0.0680361  |
| CLEC16A | rs16957864 | 16 | 11076276 | C | T | intron            | 0.4400837  | 0.0144457 | 0.3608629  | 0.0220321 | 0.558040359  | 0.01475644 |
| CLEC16A | rs7202408  | 16 | 11078615 | A | G | intron            | -0.3316806 | 0.0298604 | -0.2717319 | 0.0400604 | -0.289193058 | 0.09933188 |
| CLEC16A | rs16957872 | 16 | 11082692 | C | T | intron            | -0.3277511 | 0.0318084 | -0.2681401 | 0.042771  | -0.28482921  | 0.10435449 |
| CLEC16A | rs16957883 | 16 | 11088645 | G | T | intron            | -0.3319879 | 0.0298363 | -0.2702012 | 0.041421  | -0.289511768 | 0.09903235 |
| CLEC16A | rs8050144  | 16 | 11090087 | C | G | intron            | -0.1717848 | 0.0670794 | -0.1944804 | 0.0202541 | -0.230317447 | 0.04965848 |
| CLEC16A | rs16957894 | 16 | 11090358 | A | G | intron            | -0.3312137 | 0.0300571 | -0.2666446 | 0.0440263 | -0.290100099 | 0.09819024 |
| CLEC16A | rs8055544  | 16 | 11091561 | G | T | intron            | -0.17025   | 0.069446  | -0.1932309 | 0.0210074 | -0.228798238 | 0.05101838 |
| CLEC16A | rs8062322  | 16 | 11092319 | A | C | intron            | -0.202034  | 0.0522151 | -0.1865816 | 0.0416311 | -0.273242907 | 0.0321675  |
| CLEC16A | rs9926367  | 16 | 11093179 | C | T | intron            | -0.202402  | 0.0518067 | -0.1866159 | 0.0415884 | -0.273699649 | 0.0318852  |
| CLEC16A | rs13337334 | 16 | 11094418 | C | G | intron            | 0.2103094  | 0.0457562 | 0.2043084  | 0.0281314 | 0.316737613  | 0.01611543 |
| CLEC16A | rs7200623  | 16 | 11095045 | C | G | intron            | -0.3305547 | 0.0303571 | -0.2641979 | 0.0459817 | -0.292271938 | 0.09570763 |
| CLEC16A | rs9940155  | 16 | 11095506 | C | G | intron            | 0.3299835  | 0.0294976 | 0.2870238  | 0.0304927 | 0.395820922  | 0.03832327 |
| CLEC16A | rs9925481  | 16 | 11097479 | C | T | intron            | 0.4615598  | 0.0097863 | 0.3821464  | 0.0144055 | 0.556871006  | 0.01355418 |
| CLEC16A | rs11074944 | 16 | 11097553 | A | G | intron            | 0.4612744  | 0.0098223 | 0.3817563  | 0.0144912 | 0.555815194  | 0.01370538 |
| CLEC16A | rs723586   | 16 | 11098379 | C | G | intron            | 0.2069341  | 0.0494374 | 0.200491   | 0.031264  | 0.31379731   | 0.01718991 |
| CLEC16A | rs7192695  | 16 | 11099252 | C | T | intron            | -0.3325329 | 0.0294629 | -0.2651748 | 0.0452725 | -0.29579789  | 0.09193997 |
| CLEC16A | rs7194305  | 16 | 11099707 | A | G | intron            | -0.3098442 | 0.0013971 | -0.2814022 | 0.0011234 | -0.408580107 | 0.00087907 |
| CLEC16A | rs17804470 | 16 | 11099968 | C | G | intron            | -0.3155384 | 0.0011358 | -0.2845584 | 0.000987  | -0.413921327 | 0.00075296 |
| CLEC16A | rs7199305  | 16 | 11100333 | C | G | intron            | -0.3411516 | 0.0254518 | -0.2704262 | 0.041035  | -0.304474941 | 0.08245314 |
| CLEC16A | rs9926862  | 16 | 11103431 | G | T | intron            | 0.3203081  | 0.0335165 | 0.2743465  | 0.0375238 | 0.373269333  | 0.04810016 |
| CLEC16A | rs9932895  | 16 |          |   |   |                   |            |           |            |           |              |            |

|         |            |    |          |   |   |                   |            |           |            |           |              |            |
|---------|------------|----|----------|---|---|-------------------|------------|-----------|------------|-----------|--------------|------------|
| CLEC16A | rs7203687  | 16 | 11106920 | C | T | intron            | -0.4274116 | 0.0004564 | -0.3477825 | 0.0011547 | -0.444273833 | 0.00278377 |
| CLEC16A | rs9935174  | 16 | 11111347 | C | T | intron            | -0.3144234 | 0.0011738 | -0.2811301 | 0.0011223 | -0.413537468 | 0.000766   |
| CLEC16A | rs6498148  | 16 | 11112231 | A | C | intron            | -0.3275661 | 0.0316142 | -0.2597388 | 0.0493031 | -0.293925575 | 0.09318623 |
| CLEC16A | rs2286975  | 16 | 11114006 | C | T | intron            | 0.2151907  | 0.0409757 | 0.2031988  | 0.0290009 | 0.32197629   | 0.01474969 |
| CLEC16A | rs1003603  | 16 | 11114623 | C | T | intron            | -0.3155564 | 0.0011267 | -0.2818478 | 0.0010906 | -0.414480617 | 0.00074758 |
| CLEC16A | rs1985372  | 16 | 11114839 | A | G | intron            | -0.3160918 | 0.0011064 | -0.282305  | 0.001072  | -0.415171751 | 0.00073424 |
| CLEC16A | rs1861548  | 16 | 11118500 | C | G | intron            | -0.3163702 | 0.0010956 | -0.2825279 | 0.0010627 | -0.415438014 | 0.00072888 |
| CLEC16A | rs8045749  | 16 | 11119653 | A | G | intron            | -0.3168311 | 0.0010779 | -0.2829239 | 0.0010465 | -0.415799967 | 0.00072165 |
| CLEC16A | rs7194545  | 16 | 11124296 | C | T | intron            | -0.4346248 | 0.000427  | -0.3654005 | 0.0007495 | -0.444273947 | 0.00320793 |
| CLEC16A | rs11074946 | 16 | 11125903 | A | G | intron            | 0.4911192  | 0.0062002 | 0.4122441  | 0.0084151 | 0.572579925  | 0.01079966 |
| CLEC16A | rs7196077  | 16 | 11127055 | C | T | intron            | -0.3227654 | 0.0382494 | -0.2690097 | 0.0465893 | -0.279802015 | 0.11912698 |
| CLEC16A | rs9923455  | 16 | 11131864 | C | G | intron            | -0.3216741 | 0.0009685 | -0.2989663 | 0.0005772 | -0.414294538 | 0.00083577 |
| CLEC16A | rs9932114  | 16 | 11134903 | A | G | intron            | 0.5735308  | 0.0010156 | 0.5093185  | 0.0007564 | 0.653022236  | 0.00215382 |
| CLEC16A | rs7185202  | 16 | 11135064 | C | G | intron            | -0.1677635 | 0.0801074 | -0.199644  | 0.0200564 | -0.223428211 | 0.06240384 |
| CLEC16A | rs7184431  | 16 | 11135386 | C | G | intron            | -0.1745578 | 0.0678187 | -0.2022317 | 0.0181146 | -0.237102134 | 0.04783672 |
| CLEC16A | rs2302557  | 16 | 11136048 | C | G | intron            | -0.1751276 | 0.0671207 | -0.2025975 | 0.0179801 | -0.23817149  | 0.04701588 |
| CLEC16A | rs8056098  | 16 | 11138812 | A | G | intron            | -0.3275103 | 0.0007199 | -0.2982903 | 0.0005469 | -0.425390683 | 0.00053365 |
| CLEC16A | rs11859648 | 16 | 11140652 | A | G | intron            | 0.3810923  | 0.0099788 | 0.3578811  | 0.0055278 | 0.442318041  | 0.01567428 |
| CLEC16A | rs16957976 | 16 | 11141321 | C | T | intron            | 0.3783452  | 0.0103688 | 0.3556621  | 0.0057453 | 0.439934589  | 0.01603738 |
| CLEC16A | rs11865480 | 16 | 11142002 | A | G | intron            | 0.5439423  | 0.0016249 | 0.486751   | 0.0011757 | 0.630381717  | 0.00281106 |
| CLEC16A | rs3901386  | 16 | 11142720 | A | G | intron            | -0.3172973 | 0.0010035 | -0.2915023 | 0.0006929 | -0.415006713 | 0.0006831  |
| CLEC16A | rs876457   | 16 | 11143726 | A | G | intron            | 0.5405146  | 0.0017556 | 0.4816519  | 0.0013398 | 0.630012257  | 0.00284154 |
| CLEC16A | rs9939298  | 16 | 11145719 | C | T | intron            | 0.3738712  | 0.0114413 | 0.3498998  | 0.0066837 | 0.437660043  | 0.01675938 |
| CLEC16A | rs876476   | 16 | 11150248 | A | G | intron            | 0.2530259  | 0.0149615 | 0.2443444  | 0.0078576 | 0.384114521  | 0.00330808 |
| CLEC16A | rs2286973  | 16 | 11154770 | C | T | coding-synonymous | -0.312772  | 0.0012166 | -0.2885164 | 0.0008075 | -0.407836096 | 0.00086509 |
| CLEC16A | rs2160042  | 16 | 11158232 | C | T | intron            | 0.3800421  | 0.0432957 | 0.2927493  | 0.0733529 | 0.318328733  | 0.04046801 |
| CLEC16A | rs741175   | 16 | 11159685 | A | G | intron            | -0.2749817 | 0.0048989 | -0.2577406 | 0.003013  | -0.361012485 | 0.00337839 |
| CLEC16A | rs741174   | 16 | 11159838 | A | G | intron            | -0.2741714 | 0.0050274 | -0.2571551 | 0.0030792 | -0.359815955 | 0.0034851  |
| CLEC16A | rs741173   | 16 | 11159919 | G | T | intron            | -0.27362   | 0.0051171 | -0.2567736 | 0.0031235 | -0.358966544 | 0.00356311 |
| CLEC16A | rs8061043  | 16 | 11160929 | G | T | intron            | 0.460971   | 0.0149051 | 0.3564593  | 0.0298911 | 0.38355825   | 0.07696007 |
| CLEC16A | rs7195452  | 16 | 11163326 | C | G | intron            | 0.4702518  | 0.0114672 | 0.378946   | 0.0186995 | 0.387185003  | 0.06954968 |
| CLEC16A | rs11860603 | 16 | 11165017 | C | T | intron            | -0.2033147 | 0.053658  | -0.1865094 | 0.044146  | -0.266195968 | 0.04002394 |
| CLEC16A | rs11865121 | 16 | 11166688 | A | C | intron            | -0.20340   | 0.0534675 | -0.1866795 | 0.0438761 | -0.266127961 | 0.03999752 |
| CLEC16A | rs7198621  | 16 | 11167458 | C | G | intron            | -0.203437  | 0.0533674 | -0.1867629 | 0.0437287 | -0.26601588  | 0.04002349 |
| CLEC16A | rs16958021 | 16 | 11170047 | A | G | intron            | 0.5006849  | 0.0059078 | 0.4020579  | 0.0106559 | 0.417111849  | 0.04434547 |
| CLEC16A | rs12925642 | 16 | 11171602 | A | G | intron            | -0.2046931 | 0.0050709 | -0.188137  | 0.0412116 | -0.265429394 | 0.03937062 |
| CLEC16A | rs9652600  | 16 | 11174014 | A | G | intron            | 0.493284   | 0.0055599 | 0.3602864  | 0.0199516 | 0.380528986  | 0.0643061  |
| CLEC16A | rs9652601  | 16 | 11174365 | A | G | intron            | -0.2039244 | 0.0514636 | -0.1877528 | 0.0414638 | -0.264033076 | 0.04023835 |
| CLEC16A | rs9652582  | 16 | 11174564 | A | G | intron            | -0.1956006 | 0.0683998 | -0.1740154 | 0.0653231 | -0.259764564 | 0.04805377 |
| CLEC16A | rs2041670  | 16 | 11174652 | C | T | intron            | -0.2029486 | 0.0522455 | -0.1872382 | 0.0417133 | -0.261944749 | 0.04146283 |
| CLEC16A | rs16958028 | 16 | 11176668 | A | T | intron            | 0.5641028  | 0.0051411 | 0.4568106  | 0.0084445 | 0.512728746  | 0.02216053 |
| CLEC16A | rs7200786  | 16 | 11177801 | A | G | intron            | -0.1630246 | 0.0950894 | -0.1763818 | 0.0437859 | -0.221244352 | 0.06807356 |
| CLEC16A | rs9929994  | 16 | 11178245 | A | G | intron            | -0.1755653 | 0.0833205 | -0.1762099 | 0.0487287 | -0.228328567 | 0.06967254 |
| CLEC16A | rs12708716 | 16 | 11179873 | A | G | intron            | -0.1745157 | 0.0846583 | -0.1752232 | 0.0496333 | -0.226316811 | 0.07153252 |
| CLEC16A | rs12926153 | 16 | 11180762 | C | G | intron            | 0.4443322  | 0.0124971 | 0.3905299  | 0.0111443 | 0.372265632  | 0.06747281 |
| CLEC16A | rs9888908  | 16 | 11181244 | A | C | intron            | -0.1943843 | 0.0609109 | -0.1823784 | 0.0454882 | -0.249219131 | 0.05020162 |
| CLEC16A | rs11861236 | 16 | 11183626 | C | T | intron            | -0.255593  | 0.0078576 | -0.249545  | 0.0034836 | -0.312795016 | 0.00942832 |
| CLEC16A | rs17805769 | 16 | 11185873 | A | G | intron            | -0.2547142 | 0.0080591 | -0.2485876 | 0.0036004 | -0.311854354 | 0.00961383 |
| CLEC16A | rs12917656 | 16 | 11187862 | C | T | intron            | -0.2467792 | 0.0100329 | -0.2411651 | 0.0045796 | -0.301989077 | 0.0117657  |
| CLEC16A | rs12917716 | 16 | 11189148 | C | G | intron            | -0.2485889 | 0.0096106 | -0.2430884 | 0.0043256 | -0.305922729 | 0.01092571 |
| CLEC16A | rs7205916  | 16 | 11189256 | A | C | intron            | 0.5064233  | 0.0039772 | 0.4084142  | 0.0071205 | 0.42274515   | 0.03318876 |
| CLEC16A | rs12599402 | 16 | 11189888 | C | T | intron            | -0.2493434 | 0.0093873 | -0.243533  | 0.004252  | -0.307079346 | 0.0106361  |
| CLEC16A | rs16958051 | 16 | 11191219 | A | T | intron            | 0.5054265  | 0.0040467 | 0.40785    | 0.0071973 | 0.421622576  | 0.03365066 |
| CLEC16A | rs8061826  | 16 | 11192787 | A | G | intron            | -0.2501205 | 0.0091429 | -0.2438961 | 0.00418   | -0.308581998 | 0.0102594  |
| CLEC16A | rs3893661  | 16 | 11193880 | C | G | intron            | -0.2503188 | 0.0090164 | -0.244057  | 0.0041483 | -0.309111053 | 0.01012875 |
| CLEC16A | rs3893660  | 16 | 11193930 | C | T | intron            | -0.2516722 | 0.0086714 | -0.244728  | 0.0040253 | -0.310778452 | 0.00968585 |
| CLEC16A | rs3862468  | 16 | 11194018 | C | G | intron            | -0.2527675 | 0.0084249 | -0.2459431 | 0.0038747 | -0.310516006 | 0.0097505  |
| CLEC16A | rs9941107  | 16 | 11196041 | A | G | intron            | -0.2540416 | 0.0082384 | -0.2490363 | 0.0035155 | -0.310617645 | 0.00978552 |
| CLEC16A | rs12929596 | 16 | 11199352 | C | T | intron            | 0.4456331  | 0.0111282 | 0.3866518  | 0.0107494 | 0.370620016  | 0.06281752 |
| CLEC16A | rs998592   | 16 | 11199678 | A | G | intron            | -0.2598071 | 0.007001  | -0.2549553 | 0.0028609 | -0.312076571 | 0.00952265 |
| CLEC16A | rs9933507  | 16 | 11201428 | C | T | intron            | -0.2594601 | 0.0070854 | -0.2556211 | 0.0027929 | -0.310086396 | 0.00999802 |
| CLEC16A | rs9926078  | 16 | 11203565 | C | G | intron            | -0.2587912 | 0.0072347 | -0.255719  | 0.0027823 | -0.308218574 | 0.01045506 |
| CLEC16A | rs12103174 | 16 | 11203730 | A | G | intron            | -0.2445061 | 0.0134253 | -0.245696  | 0.0049768 | -0.283445935 | 0.01994854 |
| CLEC16A | rs767448   | 16 | 11204221 | A | G | intron            | -0.2570983 | 0.0076029 | -0.2556894 | 0.0027748 | -0.30359748  | 0.01164054 |
| CLEC16A | rs11644969 | 16 | 11205764 | A | G | intron            | 0.3398491  | 0.0513763 | 0.3308865  | 0.0306611 | 0.366880268  | 0.09500571 |
| CLEC16A | rs7198004  | 16 | 11207617 | A | G | intron            | -0.254572  | 0.0081524 | -0.2550004 | 0.0028206 | -0.298964571 | 0.01288801 |
| CLEC16A | rs7203150  | 16 | 11207722 | C | T | intron            | -0.2545307 | 0.0081629 | -0.2549721 | 0.0028237 | -0.298903207 | 0.01290622 |
| CLEC16A | rs12924985 | 16 | 11208322 | C | G | intron            | -0.2503549 | 0.0093781 | -0.2523625 | 0.0031571 | -0.294160966 | 0.01452964 |
| CLEC16A | rs12917947 | 16 | 11210243 | C | G | intron            | 0.5068613  | 0.004416  | 0.4140514  | 0.0070736 | 0.413342252  | 0.03942007 |
| CLEC16A | rs9931657  | 16 | 11210593 | C | T | intron            | 0.3339041  | 0.0571164 | 0.3365834  | 0.0288158 | 0.343723166  | 0.12001543 |
| CLEC16A | rs12925474 | 16 | 11214655 | G | T | intron            | 0.5332192  | 0.0102676 | 0.4096842  | 0.0211637 | 0.493905756  | 0.03201791 |
| CLEC16A | rs2867880  | 16 | 11231857 | A | G | intron            | -0.1913634 | 0.0576707 | -0.1746003 | 0.0494309 | -0.25996491  | 0.0374781  |
| CLEC16A | rs16958089 | 16 | 11233179 | C | T | intron            | 0.4686917  | 0.0112869 | 0.3701126  | 0.0205129 | 0.405119348  | 0.05480494 |
| CLEC16A | rs2903692  | 16 | 11238783 | A | G | intron            | -0.1958934 | 0.054491  | -0.182694  | 0.0420547 | -0.265730856 | 0.03525968 |
| CLEC16A | rs12917893 | 16 | 11239978 | A | T | intron            | -0.1988317 | 0.0513022 | -0.1827649 | 0.0424236 | -0.283042126 | 0.02572818 |
| CLEC16A | rs12927046 | 16 | 11242191 | G | T | intron            | 0.5013352  | 0.0084457 | 0.4135119  | 0.0116766 | 0.413428787  | 0.05536121 |
| CLEC16A | rs11643123 | 16 | 11260440 | A | G | intron            | 0.3888809  | 0.0119664 | 0.3179872  | 0.0175944 | 0.37299671   | 0.03675617 |
| CLEC16A | rs11640376 | 16 | 11262277 | G | T | intron            | 0.3913441  | 0.0114532 | 0.3203603  | 0.0167807 | 0.374947251  | 0.03578695 |
| CLEC16A | rs16958108 | 16 | 11263856 | G | T | intron            | 0.3486042  | 0.0236974 | 0.2998693  | 0.0247228 | 0.35426873   | 0.04711046 |
| CLEC16A | rs3960630  | 16 | 11270904 | A | C | intron            | 0.2384044  | 0.0231353 | 0.2643677  | 0.0082246 | 0.196927906  | 0.167253   |
| STAT3   | rs1053023  | 17 | 40465616 | A | G | utr-3             | -0.2461169 | 0.0348836 | -0.191739  | 0.0673701 | -0.186777021 | 0.20247488 |
| STAT3   | rs1053005  | 17 | 40465910 | A | G | utr-3             | -0.2483011 | 0.03244   | -0.1921863 | 0.0651745 | -0           |            |

Sheet1

|       |            |    |          |   |   |             |            |           |            |           |              |            |
|-------|------------|----|----------|---|---|-------------|------------|-----------|------------|-----------|--------------|------------|
| STAT3 | rs8078731  | 17 | 40480381 | A | T | intron      | -0.2467481 | 0.0399454 | -0.1744203 | 0.1065472 | -0.263245557 | 0.08308545 |
| CD226 | rs8098294  | 18 | 67550775 | G | T | intron      | -0.4991112 | 0.1710161 | -0.8219721 | 0.0414855 | -0.278718951 | 0.56912266 |
| CD226 | rs1790970  | 18 | 67555201 | G | T | intron      | -0.4968249 | 0.1738783 | -0.8199484 | 0.0424921 | -0.275652815 | 0.57398664 |
| CD226 | rs17081853 | 18 | 67597396 | A | G | intron      | 0.5634752  | 0.1406471 | 0.7023346  | 0.0338783 | 0.429882518  | 0.37989749 |
| CD226 | rs10048373 | 18 | 67600383 | C | T | intron      | 0.5578026  | 0.1438707 | 0.6986365  | 0.0345103 | 0.419338184  | 0.39093169 |
| CD226 | rs11151547 | 18 | 67600991 | C | T | intron      | 0.330295   | 0.0159341 | 0.2827366  | 0.0221165 | 0.396573241  | 0.01963013 |
| CD226 | rs9965747  | 18 | 67620887 | A | G | intron      | 0.6000568  | 0.1071952 | 0.7338821  | 0.0231845 | 0.501669301  | 0.28471213 |
| CD226 | rs1539964  | 18 | 67625285 | A | G | near-gene-5 | 0.3133776  | 0.0177773 | 0.2622074  | 0.0276824 | 0.373304481  | 0.02283789 |
| CD40  | rs11569345 | 20 | 44758521 | A | G | near-gene-3 | 0.2961024  | 0.1764126 | 0.3889682  | 0.041899  | 0.241586572  | 0.34619501 |
